# Supplementary material for: Detailed analysis of chick optic fissure closure reveals Netrin-1 as an essential mediator of epithelial fusion
Source: eLife. 2019 Jun 4;8:e43877. doi: 10.7554/eLife.43877 (PMC6606025; doi:10.7554/eLife.43877)
Supplement: Figure 3—source data 1. [file elife-43877-fig3-data1.xlsx]

## Sheet: Sheet1
Kallisto analysis of RNAseq data from segmentally dissected E5 chick eyes
length	eff_length	est_counts	transcript	ens_gene	ext_gene	dorsal 1	dorsal 2	dorsal 3	fissure 1	fissure 2	fissure 3	whole 1	whole 2	whole 3	ventral 1	ventral 2	ventral 3
1548	1249	117895	ENSGALT00000029093	ENSGALG00000018373	COX1	21755.3	30356.5	818.206	22676.6	25202.1	19071.9	22195.3	24285.3	20745	10305.2	10345.9	17755.2
784	485	59292	ENSGALT00000029087	ENSGALG00000018367	COX3	26675.6	40781.9	674.055	29369.7	30859.3	24223.9	30990.1	46528.8	19399.1	17623.9	21382	18637.6
684	385	52888	ENSGALT00000029090	ENSGALG00000018370	Cu	28808.6	41916.9	1039.73	33002.1	37596.4	74065.4	40460.9	71215.4	47867.7	32690.3	32940.8	42860.6
684	385	45304	ENSGALT00000029088	ENSGALG00000018368	ATP6	23303.7	34302.1	951.623	28269.7	28869.1	20618.8	29958.7	37210	17560.6	12313.1	14585	15537
1684	1385	43949	ENSGALT00000025653	ENSGALG00000015917	EF1A	7589.99	5997.36	7976.91	7623.33	6284.55	5243.36	6022.3	4795.21	6524.69	5078.7	4588.81	5278.41
1143	844	43581	ENSGALT00000029080	ENSGALG00000018360	cytb	11711.5	16817.9	684.051	12405.1	14914.6	10003.7	14362	19816.5	11146.5	6066.97	7313.62	9139.38
1685	1386	34418.3	ENSGALT00000015673	ENSGALG00000009621	ACTB	6135.14	5946.25	8149.85	5965.84	7549.93	5072.85	5654.14	4106	5242.87	5224.11	4684.22	6485.26
1818	1519	32566	ENSGALT00000029081	ENSGALG00000018361	ND5	5241.19	7504.38	355.811	5150.53	6904.59	5352.68	5370.48	5706.01	6600.54	2617.16	2550.75	4387.24
1378	1079	30170	ENSGALT00000029084	ENSGALG00000018364	ND4	6761.23	8631.15	502.028	6717.37	8024.13	8044.91	7994.81	8127.57	9513.92	3351.56	3637.34	6655.02
975	676	27833	ENSGALT00000029102	ENSGALG00000018382	ND1	10653.2	13740.6	901.67	9891.42	12166.8	11929.2	12513.2	13417.1	12747.5	6283.56	7522.88	11827.1
1041	742	25831	ENSGALT00000029098	ENSGALG00000018378	ND2	8568.98	10413.5	429.393	8363.4	10602.5	8121.38	8203.52	7722.05	9724	3960.46	3841.31	5977.85
1205	906	20247	ENSGALT00000023323	ENSGALG00000014442	GAPDH	5550.16	4740.54	5439.27	5368.81	5954.36	4115.34	5850.94	6444.01	4264.51	4293.58	4984.26	4620.33
3972	3673	17505	ENSGALT00000010524	ENSGALG00000006512	HSPA8	1075.92	820.417	1285.42	1144.95	901.731	1021.51	826.394	730.708	1215.52	834.483	769.616	1004.03
1826	1527	16331	ENSGALT00000045981	ENSGALG00000028749		2741.08	2558.74	2870.85	2569.32	3319.16	2177.59	2498.26	2481.99	1941.41	1967.68	1423.74	2266.12
1071	772	13874	ENSGALT00000019495	ENSGALG00000011951	RPSA	4840.14	3913.67	5157.82	4317.47	4453.96	3137.92	5379.95	6013.81	3492.09	4269.48	3861.86	3741.84
1029	730	12794	ENSGALT00000045693	ENSGALG00000026742		2960.29	3528.52	2591.92	4210.45	3794.64	1739.12	3098.75	1592.91	2217.34	2070.79	6976.62	1588.46
1727	1428	12687	ENSGALT00000003745	ENSGALG00000002377	ENO1	2831.78	1700.54	3772.37	2134.4	1874.82	2436.44	2372.14	1921.14	3022.34	2308.15	2085.17	2478.6
880	581	12224.2	ENSGALT00000007741	ENSGALG00000004848	YBX1	4750.89	3383.84	3232.86	5054.63	4788.9	3815.41	3552.32	3961.45	4166.27	4547	3714.68	2758
4212	3913	11937.9	ENSGALT00000039859	ENSGALG00000005587	EIF4G2	726.797	508.395	1064.45	732.932	608.863	451.86	274.674	153.382	602.682	413.858	385.016	605.203
1398	1099	11464	ENSGALT00000012495	ENSGALG00000007711	RPL4	2298.78	1931.76	2492.33	2506.02	2107.16	1793.55	2041.81	1924.7	1785.15	2053.11	1983.43	1772.12
2567	2268	11202.7	ENSGALT00000012486	ENSGALG00000007705	NCL	1002.54	689.191	56.9247	1186.66	933.303	911.469	674.179	449.604	1105.11	899.831	1101.24	1048.82
889	590	9463	ENSGALT00000003436	ENSGALG00000002197	NPM1	3647.36	2555.84	5140.27	3853.21	3371.24	4273.93	2572.78	2868.63	3650.19	3953.32	3635.85	4246.33
1638	1339	9325	ENSGALT00000018765	ENSGALG00000011511	CKB	1732.44	1112.75	2453	1673.07	1436.06	1456.05	1625.34	1575.65	1560.31	1931.21	1586.93	1882.9
882	583	9293	ENSGALT00000016380	ENSGALG00000010077	RPS3A	3546.78	2555.7	5259.58	3829.42	3810.07	3728.12	4174.07	4290.67	3112.08	4575.84	4731.7	4434.86
622	323	9072	ENSGALT00000044106	ENSGALG00000028600	PPIA	6922.52	6734.8	6548.01	6747.55	6634.89	5175.34	12540.3	10917	5477.95	6115.78	4456.7	5839.86
1030	731	8871	ENSGALT00000024329	ENSGALG00000015082	RPS6	3033.06	2700.67	129.975	2915.42	3612.66	3550.1	4622.57	4275.57	4443.92	5220.84	6211.75	4225.61
906	607	8425	ENSGALT00000008816	ENSGALG00000005490	RPS2	4398.05	3764.44	3825.64	3334.47	4238.58	3203.08	5113.03	4095.34	2811.63	3961.41	4843.14	3812.04
2261	1962	8168	ENSGALT00000018521	ENSGALG00000011351	HSP90AA1	947.582	667.909	1101.18	1000.14	748.141	699.009	488.164	382.051	754.971	674.41	711.423	706.572
5124	4825	8103.01	ENSGALT00000032638	ENSGALG00000013239	NES	135.432	103.677	236.943	403.454	340.253	380.011	82.8369	52.9207	263.579	119.492	94.1615	257.056
846	547	8060	ENSGALT00000007717	ENSGALG00000004831	RPS4X	3595.12	3419.85	3722.28	3539.92	3693.7	2963.06	4153.96	4515.46	2681.85	4827.52	4920.34	3333.25
988	689	7902	ENSGALT00000011731	ENSGALG00000023294	RPLP0	2713.83	2442.57	2471.87	2755.26	2662.24	1668.7	3149.7	2952.36	1698.21	2789.88	2548.75	1896.11
947	648	7727	ENSGALT00000007692	ENSGALG00000004818	RPL6	2778.7	2375.19	2428.49	2864.71	2499.64	1657.14	2797.6	3401.56	1653.03	3047.22	3291.5	1920.05
1139	840	7605	ENSGALT00000000171	ENSGALG00000000122	GNB2L1	2043.69	1938.2	1959.94	2175.03	2036.57	2374.63	2525.48	2264.73	1282.89	1695.38	1806.98	1636.2
1307	1008	7592	ENSGALT00000030605	ENSGALG00000012172	RPL3	1892.57	1583.12	2210.85	1809.43	1729.49	1474.73	1768.62	1398.69	1589.35	1959.72	2014.45	1737.67
165	165	7516	ENSGALT00000035259	ENSGALG00000021717	ATP8	11752.7	17119.7	861.121	10943.3	14958.5	9026	13948.1	12307	8448.63	5535.97	5885.13	6723.04
592	293	7432	ENSGALT00000000206	ENSGALG00000000150	RPL9	6643.43	5672.34	4054.29	6093.73	6732.86	5721.44	7617.04	7482.09	3824.45	6855.52	5675.16	5264.29
1615	1316	7387.99	ENSGALT00000022476	ENSGALG00000029076	TUBB	1303.48	945.683	1873.28	1348.7	1458.53	1199.26	967.765	678.389	1353.57	584.413	497.836	1358.59
5065	4766	7367	ENSGALT00000009355	ENSGALG00000005823	HDLBP	309.428	206.969	8.96908	371.349	301.342	273.539	156.696	80.947	343.655	162.13	127.48	266.749
964	665	7299	ENSGALT00000039524	ENSGALG00000004509	UbI	2555.62	2126.27	3719.95	2636.86	3036.14	2849.71	3149.18	3892.02	2449.45	2785.96	2611.89	3540.14
1963	1664	7122.83	ENSGALT00000038318	ENSGALG00000000433		924.354	761.635	991.775	1028.36	891.482	948.514	941.419	891.799	828.571	547.755	521.65	832.335
905	606	6955	ENSGALT00000002237	ENSGALG00000001475	STMN1	2600.18	2052.42	2840.98	2757.21	2267.03	2443.43	2506.44	2503.31	2085.57	3204.83	2747.45	2208.83
2538	2239	6921.86	ENSGALT00000034751	ENSGALG00000001992	PKM	688.279	525.929	838.204	742.701	573.058	589.464	526.081	389.358	723.969	448.316	404.478	707.838
863	564	6688	ENSGALT00000039254	ENSGALG00000003197	RPL7A	2810.83	2431.6	3132.02	2848.8	2784.37	2256.13	2858.74	2968.68	2679.88	3323.81	3260.1	2516.16
297	297	6626	ENSGALT00000035261	ENSGALG00000021719	ND4L	6469.52	7395.63	258.721	5359.7	5758.42	5456.02	4558.59	3203.19	6323.65	1570.47	1423.01	3977.34
673	374	6609	ENSGALT00000043161	ENSGALG00000026383	TMSB4X	4493.09	4953.08	4314.09	4245.31	6337.19	3773.02	3819.97	3935.93	2441.2	6501.7	5065.93	3693.99
3314	3015	6539	ENSGALT00000038715	ENSGALG00000009250	HNRNPA3	545.318	424.602	1052.04	521.038	527.754	552.115	337.694	243.34	711.322	441.985	366.087	704.77
2609	2310	6527	ENSGALT00000016542	ENSGALG00000010175	HSP90AB1	683.799	493.608	1017.48	678.808	535	618.81	479.679	317.19	773.818	446.285	441.592	685.352
2717	2418	6395	ENSGALT00000002401	ENSGALG00000001580	ANP32B	611.056	509.297	1012.76	635.374	587.12	645.439	447.271	363.936	806.776	553.941	636.77	755.068
751	452	6389	ENSGALT00000013725	ENSGALG00000027142	RPL32	3338.23	2637.92	4012.62	3395.78	3567.87	3789.8	3774.99	5203.15	3053.6	6678.96	5274.14	3535.73
727	428	6383	ENSGALT00000016466	ENSGALG00000010124	RPS8	3697.76	3238.28	3161.24	3582.83	3484.21	4048.48	3624.84	3821.16	2842.01	5013.39	4132.9	2647.38
4158	3859	6291	ENSGALT00000035835	ENSGALG00000013587	COL2A1	337.012	385.572	221.324	391.643	390.476	371.063	299.657	275.505	374.492	281.997	185.478	296.504
2924	2625	6163	ENSGALT00000036604	ENSGALG00000016691		611.143	622.739	1008.58	564.038	561.072	538.888	523.045	437.774	540.614	485.516	501.892	749.177
4208	3909	6102	ENSGALT00000011551	ENSGALG00000007129	ALDH6	10.0322	5.70466	23.2876	375.018	200.777	333.418	18.9357	14.8095	83.6069	83.6066	55.218	197.244
2907	2608	6036	ENSGALT00000010215	ENSGALG00000006319	TGFBI	276.135	294.554	236.17	556.016	452.49	287.546	103.14	79.8199	194.538	113.289	94.2074	313.147
2675	2376	5983.72	ENSGALT00000002831	ENSGALG00000001830	EEF2	451.296	194.82	692.05	605.02	304.328	397.46	33.4599	1.86868	460.02	18.6536	7.46016	486.888
1436	1137	5815	ENSGALT00000025572	ENSGALG00000015862	CA2	2090.56	1216.98	3977.87	1228.67	951.461	1409.68	1470.03	1248.64	1977.79	1284.31	1131.07	1875.08
9661	9362	5773.72	ENSGALT00000023397	ENSGALG00000001183	MYH10	115.049	81.2617	184.057	148.16	108.997	133.228	42.6951	26.8837	136.779	56.6256	49.2369	113.445
649	350	5703.47	ENSGALT00000004252	ENSGALG00000002696		4113.04	3099.51	88.3727	3914.87	3792.36	3030.86	4703.38	5367.48	2736.51	3908.37	4861.11	2933.53
3430	3131	5676.28	ENSGALT00000045049	ENSGALG00000001830	EEF2	531.086	536.54	512.048	435.538	573.727	319.764	502.749	370.758	398.715	478.568	403.035	333.416
693	394	5661	ENSGALT00000040117	ENSGALG00000001658	RPL19	2742.57	2310.11	6376.11	3451.77	3546.22	5172.3	3593.85	3484.57	3701.97	6876.71	5808.41	5134.84
13969	13670	5649	ENSGALT00000037512	ENSGALG00000011330	DYNC1H1	88.912	66.1498	128.652	99.277	55.3047	68.7005	30.9437	16.8847	82.4243	39.163	24.9519	68.6902
803	504	5582	ENSGALT00000025211	ENSGALG00000015637	RPL7	2823.9	2364.85	3452.68	2660.75	2804.59	2655.1	2909.36	2942.33	2638.99	3987.35	4282.68	2845.2
2611	2312	5522	ENSGALT00000005586	ENSGALG00000003532	DDX5	568.57	498.987	1095.79	573.791	584.915	525.5	383.909	290.028	605.33	489.002	389.113	763.974
952	653	5504	ENSGALT00000009525	ENSGALG00000005922	RPL5	2099.47	1738.13	2900.73	2024.93	2094.46	2079.42	1961.47	2072.71	1923.49	2890.78	3156.11	2312.49
351	52	5431	ENSGALT00000029086	ENSGALG00000018366	ND3	25779.7	37427	908.582	25091.2	29799.9	33192.7	34240.9	38617.5	18658.3	20532.5	24075.3	19799.1
1794	1495	5383	ENSGALT00000023333	ENSGALG00000014450	PABPC1	910.693	847.019	1240.5	865.025	937.118	677.02	812.233	628.707	907.092	743.67	906.204	777.414
4682	4383	5377	ENSGALT00000040062	ENSGALG00000003922	TOP2A	248.241	153.826	347.588	294.723	176.1	236.402	72.5646	35.3593	255.353	120.219	93.2643	250.062
1004	705	5359	ENSGALT00000026174	ENSGALG00000016232	RPL8	2071.57	1812.3	1701.18	1826.17	1687.3	1169.39	2085.03	2074.52	1067.3	1912.09	2243.71	1221.66
1383	1084	5111	ENSGALT00000014123	ENSGALG00000008677	vimentin	1220.54	1247.93	1535.86	1132.72	1430.17	1132.44	995.922	1008.67	1148.02	1108.46	922.348	1285.99
741	442	4959	ENSGALT00000013622	ENSGALG00000008367	MDK	2775.79	2745.48	3700.89	2695.36	3373.85	3480.62	3210.56	2955.12	2605.73	2171.4	1686.89	3345.74
705	406	4874	ENSGALT00000009974	ENSGALG00000006179	RPL13	3112.59	2868.43	3140.29	2884.06	2970.64	2420.24	3640.78	3728.05	2062.7	5664.21	5095.9	2466.69
1296	997	4854	ENSGALT00000000504	ENSGALG00000000372	HMGN2	1259.09	1048.72	2164.59	1169.63	1167.53	1062.49	1228.64	907.071	1070.8	1188.58	1148.23	1429.1
715	416	4823	ENSGALT00000023987	ENSGALG00000014866	FABP7	3494.37	2180.29	6628.41	2785.28	3086.08	4779.1	4481.13	3531.62	5320.06	8915.06	6617.11	5067.3
1648	1349	4776	ENSGALT00000036114	ENSGALG00000022539	ATP5B	847.886	806.11	555.881	850.546	872.69	722.786	1003.95	857.4	813.21	829.349	747.087	802.484
11496	11197	4746	ENSGALT00000000433	ENSGALG00000000327	FBN3	119.438	115.633	139.431	101.829	77.2676	73.3185	35.6253	19.4788	105.756	25.1645	16.4214	80.5685
1359	1060	4740	ENSGALT00000045491	ENSGALG00000028932		969.45	722.781	429.883	1074.28	1049.33	1021.39	728.084	548.151	947.809	580.896	448.99	955.349
1796	1497	4674	ENSGALT00000014113	ENSGALG00000008667	DSTN	791.949	690.238	1559.77	750.088	831.548	816.892	750.944	609.674	951.193	1040.32	1017.85	1150.2
833	534	4583.35	ENSGALT00000028006	ENSGALG00000017330	RPS3	2129.72	1912.41	1549.72	2061.99	1755.83	1350.44	2126.5	2065.47	1432.11	2611.48	2483.66	1368.33
1624	1325	4580	ENSGALT00000040330	ENSGALG00000005955	HNRNPH1	828.118	621.765	1167.89	830.415	692.539	764.175	397.085	296.485	860.703	454.197	301.271	911.453
7264	6965	4577	ENSGALT00000004650	ENSGALG00000002943	PRPF8	161.846	144.368	218.336	157.872	124.08	132.823	81.0378	56.5711	163.836	85.8921	75.1418	131.039
868	569	4495	ENSGALT00000011687	ENSGALG00000007220	FTH1	1981.12	1936.74	3788.84	1897.85	2328.5	2194.74	2406.43	2488.14	3470.67	3438.69	2761.26	2500.17
978	679	4487	ENSGALT00000016648	ENSGALG00000010243	PRDX1	1668.23	1416.55	3567.81	1587.57	2168.74	2469.63	2346.45	1591.59	1870.16	2175.92	1883.79	2905.71
6353	6054	4487	ENSGALT00000023339	ENSGALG00000013565	CHD4	161.105	109.789	220.746	178.057	129.874	142.809	76.0375	51.6225	164.773	85.7484	84.8645	131.485
2324	2025	4364	ENSGALT00000001476	ENSGALG00000001000	HSPA5	505.884	576.225	673.879	517.732	388.741	455.763	334.665	229.23	564.992	324.592	284.243	493.557
412	113	4353	ENSGALT00000023311	ENSGALG00000014432	RPS20	7701.06	7843.29	8003.8	9254.56	8302.38	5755.36	14364.7	9842.48	5263.52	13090.3	12644.7	7104.76
2244	1945	4342	ENSGALT00000016679	ENSGALG00000010255	NASP	393.373	295.166	672.856	536.31	420.886	462.239	249.944	206.808	516.246	357.913	365.808	466.549
4526	4227	4262	ENSGALT00000026171	ENSGALG00000016231	DDX3X	255.257	180.067	637.063	242.229	215.687	310.965	118.541	70.9785	417.22	185.327	136.423	411.744
5092	4793	4219	ENSGALT00000044027	ENSGALG00000028872	TPT1	227.674	194.076	333.561	211.469	232.558	192.969	208.485	160.247	245.207	319.112	346.371	240.032
902	603	4196	ENSGALT00000013189	ENSGALG00000008125	UbI	1770.54	1646.78	2399.64	1671.72	1763.1	1109.07	1933.97	2001.03	1254.88	2596.68	2742.56	1757
2164	1865	4132	ENSGALT00000027593	ENSGALG00000017082	HMGB1	485.631	401.53	806.113	532.264	522.041	612.19	312.822	238.244	643.885	572.916	512.667	580.355
2732	2433	4129	ENSGALT00000020773	ENSGALG00000012726	HSP90B1	423.024	501.574	607.607	407.707	336.661	369.38	228.175	191.404	421.147	361.238	333.18	378.429
2858	2559	4116	ENSGALT00000009619	ENSGALG00000005980		363.519	270.405	344.301	386.412	356.644	418.077	323.638	225.346	415.908	333.498	347.182	446.168
521	222	4107	ENSGALT00000025176	ENSGALG00000015617	RPS23	4931.73	4892.24	120.832	4444.44	5382.78	3050.43	7291.1	9859.13	3133.82	6819.38	8289.63	4230.56
3241	2942	4059	ENSGALT00000019428	ENSGALG00000011905	CTNNB1	365.523	314.326	476.424	331.453	300.418	257.116	187.248	129.245	304.99	202.911	144.742	319.986
960	661	4039	ENSGALT00000022666	ENSGALG00000013990	RPS12	1320.15	1201.76	1501.02	1467.97	1261.69	975.755	1398.16	1226.28	900.4	2182.43	2285.83	1246.73
890	591	4030.81	ENSGALT00000028027	ENSGALG00000017345	HBG1	3423.83	4616.03	2945.03	1638.51	1394.71	1732.12	3512.03	4672.57	2575.49	3599.64	2796.17	1303.64
4481	4182	4025.94	ENSGALT00000007488	ENSGALG00000004701	SET	239.791	178.957	439.776	231.275	234.73	230.762	178.96	123.868	303.712	218.801	235.51	288.68
1678	1379	4024	ENSGALT00000034226	ENSGALG00000003806	cRhoA	776.337	677.523	1291.51	701.034	728.296	718.513	653.399	565.026	825.957	850.325	771.414	953.606
811	512	3904	ENSGALT00000012307	ENSGALG00000007611	RPL35A	1891.13	1783.48	37.8576	1831.83	2190.9	1297.89	2145.43	2566.96	1187.68	4222.28	3235.21	1370.91
2384	2085	3869	ENSGALT00000005575	ENSGALG00000003522	RBBP4	508.664	389.175	773.68	445.798	434.777	416.495	371.432	277.242	527.398	327.62	297.535	534.648
2889	2590	3830	ENSGALT00000045278	ENSGALG00000027035	RPL21	330.533	293.086	496.538	355.258	326.561	537.941	342.702	348.758	491.03	639.282	629.053	458.75
2109	1810	3815	ENSGALT00000022035	ENSGALG00000013532	CAPRIN1	503.188	302.724	627.139	506.362	395.499	374.532	154.918	81.4343	443.331	190.589	131.914	370.848
1691	1392	3781.23	ENSGALT00000019966	ENSGALG00000012225	CIRBP	743.651	552.231	1261.45	652.587	681.02	700.182	438.812	276.898	900.585	857.686	655.412	935.83
1240	941	3753	ENSGALT00000011553	ENSGALG00000007131		842.85	665.228	1360.05	958.152	818.733	925.022	794.202	738.922	952.515	1281.81	1239.79	1071.8
3373	3074	3740	ENSGALT00000003907	ENSGALG00000002478	MATR3	265.951	186.093	461.99	292.289	218.348	287.84	97.1847	50.729	329.31	179.491	131.765	310.278
5143	4844	3693	ENSGALT00000015192	ENSGALG00000009328	EIF3A	158.584	126.127	272.635	183.156	134.32	173.234	66.8917	42.6	227.566	90.506	77.897	161.94
532	233	3602	ENSGALT00000012476	ENSGALG00000007699	RPS25	3490.4	3223.73	3410.76	3713.93	3143.31	2679.08	3873.52	4258.6	2435.91	6168.81	5617.77	3036.9
1052	753	3586	ENSGALT00000043325	ENSGALG00000027807	RPS26	1179.76	1159.79	423.58	1144.09	1255.95	835.004	1697.02	1691.07	614.834	1084.1	1196.14	833.213
577	278	3580	ENSGALT00000009566	ENSGALG00000005948	RPL27A	3357.72	3143.9	2218.7	3093.74	3136.75	1607.58	3302.53	4165.93	1448.77	4421.26	5059.25	2028.7
1575	1276	3510.21	ENSGALT00000039936	ENSGALG00000002558	ASL1	619.416	1436.1	3.31828	660.887	2.37287	4.83493	20112.7	25211.8	13776.5	2681.12	2448.85	520.419
2392	2093	3509	ENSGALT00000008838	ENSGALG00000005507	NONO	371.803	315.716	660.75	402.772	347.328	366.216	233.493	171.976	460.009	262.25	205.238	450.207
1323	1024	3471	ENSGALT00000013984	ENSGALG00000008590	EEF1B2	767.76	678.861	902.16	814.329	674.849	599.291	641.399	509.637	633.796	768.437	895.2	659.393
638	339	3457.65	ENSGALT00000034721	ENSGALG00000002932	NME2	2334.35	2274.55	3417.33	2450.34	2700.43	1673.63	3271.9	2954.61	1853.27	3121.55	4023.85	2437.78
721	422	3444	ENSGALT00000004168	ENSGALG00000002644	RPL10A	1834.55	1696.89	1934.86	1960.63	1750.08	1540.12	1990.59	1919.02	1360.95	2484.81	2775.92	1557.48
2476	2177	3435	ENSGALT00000040028	ENSGALG00000002139	CSDE1	393.974	269.564	609.657	379.065	330.887	312.369	134.73	69.6686	410.834	230.048	166.717	355.913
4132	3833	3427	ENSGALT00000017361	ENSGALG00000010671	HNRNPU	222.44	183.675	368.07	214.793	226.393	239.97	151.039	102.685	244.063	205.125	157.259	248.837
996	697	3390	ENSGALT00000026442	ENSGALG00000016392	RPS7	1150.92	1044.69	1156.07	1168.46	1062.3	753.656	1161.75	1075.14	842.681	1900.47	2154.76	779.755
2613	2314	3336.1	ENSGALT00000006174	ENSGALG00000003882	SMARCE1	305.059	242.598	495.248	346.355	304.756	319.266	208.33	168.376	337.568	307.098	284.673	331.836
1729	1430	3327	ENSGALT00000037758	ENSGALG00000011290	RPL15	591.569	530.039	598.339	558.936	540.578	365.46	685.14	803.083	348.384	808.421	759.928	506.632
815	516	3323	ENSGALT00000036375	ENSGALG00000017299	RPS11	1300.27	1614.43	1430.46	1547.13	1507.27	1168.98	1937.19	1768.97	1114.71	3276.06	2310.51	1226.57
4210	3911	3318.94	ENSGALT00000034417	ENSGALG00000004304	TCF12	261.639	235.605	370.12	203.872	236.403	190.034	123.93	84.9913	184.277	154.802	124.907	214.5
1426	1127	3318.17	ENSGALT00000018477	ENSGALG00000011324		694.361	534.458	2225.41	707.327	953.413	760.204	921.803	621.179	1251.77	776.508	706.179	1185.94
2108	1809	3318	ENSGALT00000013589	ENSGALG00000008348	PDIA3	442.634	538.991	673.789	440.639	423.666	493.506	333.354	277.266	542.469	393.005	380.052	536.408
950	651	3289.29	ENSGALT00000027081	ENSGALG00000016775	RPL31	1138.61	1104.6	1853.16	1213.85	1286.65	1016.05	1669.46	1417.24	956.301	1740.67	2110.95	1510.41
1537	1238	3282.96	ENSGALT00000013980	ENSGALG00000008586	TUBB4B	699.461	552.636	1079.44	637.075	682.673	802.11	744.347	695.679	884.84	778.518	719.186	878.935
1135	836	3226	ENSGALT00000004055	ENSGALG00000002569	RAN	968.336	804.577	2284.81	927.051	1037.43	1352.33	1124.49	932.788	1432.61	1559.34	1404.43	1800.39
444	145	3223	ENSGALT00000007776	ENSGALG00000004871	RPS24	5504.76	4689.02	7232.85	5339.96	5805.35	4872.98	4952.55	5738.95	5042.88	10136.6	9067.61	5675.94
1578	1279	3207	ENSGALT00000036274	ENSGALG00000005001	CNBP	660.159	482.49	1236.61	602.385	592.208	659.362	543.958	400.011	866.167	810.889	787.142	866.528
6670	6371	3203	ENSGALT00000000582	ENSGALG00000000427	KDM5B	124.259	94.3614	166.055	120.78	100.977	110.75	92.4772	78.8451	126.738	89.3776	87.6688	123.185
1966	1667	3201	ENSGALT00000013137	ENSGALG00000008094	HSPD1	468.257	404.451	729.939	461.313	393.711	442.428	288.94	217.59	542.429	394.586	363.83	522.237
2104	1805	3201	ENSGALT00000025984	ENSGALG00000016131	EEF1D	448.271	393.195	447.376	426.043	419.238	359.131	424.146	492.563	360.416	430.564	419.574	386.871
688	389	3199	ENSGALT00000009208	ENSGALG00000021253	ITGB1BP3	2080.02	1805.16	4177.54	1975.65	2307.89	2449.55	2498.35	2105.42	2867.23	2740.62	3268.98	3113.09
550	251	3163	ENSGALT00000006318	ENSGALG00000003966	RPL23A	2487.07	3282.65	3245.45	3027.41	2966.84	1786.71	3069.25	2967.67	4274.49	5310.37	6518.63	2400.87
1704	1405	3153	ENSGALT00000017975	ENSGALG00000011036	HNRNPA2B1	595.734	499.144	1208.73	539.129	567.012	769.025	429.436	328.789	901.739	567.308	418.778	919.485
1234	935	3149	ENSGALT00000016642	ENSGALG00000010238	NAP1L1	788.912	579.695	1552.39	809.108	765.365	692.387	463.701	351.727	870.081	886.36	823.66	1072.52
2120	1821	3134	ENSGALT00000002022	ENSGALG00000001328	BSG	390.64	490.33	712.876	413.461	402.581	488.737	323.602	264.881	519.765	377.04	331.598	541.555
1369	1070	3124.45	ENSGALT00000021652	ENSGALG00000013257	LDHB	657.501	556.783	787.025	701.513	589.329	660.143	605.246	501.364	582.618	681.164	658.907	757.129
1792	1493	3106	ENSGALT00000017483	ENSGALG00000010745	HMGB2	442.064	308.475	832.049	499.789	438.804	596.299	356.261	313.344	541.597	550.823	388.74	577.086
667	368	3092.16	ENSGALT00000006305	ENSGALG00000003971	TCEB3	2953.12	2033.5	3224.81	2018.65	2788.15	4617.38	2697.84	2386.44	3489.47	6523.96	5077.08	3210.19
7647	7348	3085	ENSGALT00000039770	ENSGALG00000004719	SPTAN1	89.04	70.7288	116.749	100.863	60.6392	71.267	46.8982	29.1878	99.7095	42.7224	32.0586	62.1475
610	311	3080	ENSGALT00000015981	ENSGALG00000009829	RPL18A	2934.53	2691.77	2089	2379.23	2305.57	1509.86	3087.9	3297.34	1366.4	3719.74	3603.88	1682.48
515	216	3076	ENSGALT00000002496	ENSGALG00000001634	RPL23	3797.22	3343.66	2418.08	3421.2	3151.16	1711.01	3590.29	3535.08	1518.41	3091.69	4063.79	1972.75
8318	8019	3069.88	ENSGALT00000042830	ENSGALG00000008156	SPTBN1	90.0596	85.2369	142.442	91.9702	62.5517	68.9671	36.6695	16.9157	109.442	42.5402	27.1828	75.1133
2667	2368	3048	ENSGALT00000000616	ENSGALG00000000454	KPNB1	300.122	201.313	272.458	309.228	258.304	287.263	101.612	45.9621	379.368	125.242	226.416	312.036
1034	735	3045	ENSGALT00000036146	ENSGALG00000022570		693.252	639.606	986.108	995.28	888.769	1055.46	1024.05	882.517	908.34	1046.11	878.834	1035.42
814	515	3034	ENSGALT00000004524	ENSGALG00000002868	RPL26L1	1464.15	1365.72	1348.55	1415.32	1412.94	1237.66	1374.73	1341.64	937.755	2521.39	2459.88	1033.34
3208	2909	3030	ENSGALT00000003963	ENSGALG00000002514	SFPQ	239.997	192.425	401.038	250.233	210.185	220.061	145.081	109.526	273.124	164.991	129.163	268.593
2751	2452	3026	ENSGALT00000023586	ENSGALG00000014634	PMEL	295.716	386.234	336.104	296.479	298.787	350.402	325.408	212.137	379.83	242.681	209.096	328.634
1662	1363	3007.19	ENSGALT00000002698	ENSGALG00000014644	ATP5A1	586.986	573.911	16.5676	530.041	540.822	499.393	567.163	577.117	596.783	523.917	407.418	572.161
584	285	3007	ENSGALT00000024756	ENSGALG00000015339	RPL24	2270.86	2015.18	1638.33	2534.74	2125.47	1132.53	2348.7	2715.19	930.727	2573.3	2739.58	1329.6
992	693	2993	ENSGALT00000018317	ENSGALG00000011229	SERBP1	1066.72	771.621	44.9515	1037.57	968.884	1280.48	652.1	551.768	1365.65	913.795	885.953	1152.29
450	151	2982	ENSGALT00000024514	ENSGALG00000015195	RPS15	4335.54	4106.38	3622.87	4744.34	5523.05	4464.1	6832.39	6721.17	3301.82	7162.52	7711.98	4586.4
3272	2973	2949	ENSGALT00000046025	ENSGALG00000026490	RPS16	267.807	246.834	318.36	238.301	291.087	210.727	347.666	395.656	161.275	347.671	402.092	270.681
3986	3687	2942	ENSGALT00000008096	ENSGALG00000005048	SMARCC1	169.638	108.064	262.106	191.697	134.499	154.669	64.6247	34.9656	200.548	71.802	53.6281	168.521
1840	1541	2930	ENSGALT00000019010	ENSGALG00000011637	TCP1	500.744	378.161	677.429	456.784	418.237	362.847	464.002	339.834	458.604	462.49	446.839	494.679
11154	10855	2908	ENSGALT00000007259	ENSGALG00000004561	TNRC18	42.8364	39.4301	64.8569	64.3591	52.2786	50.5647	20.9776	13.4999	49.8328	21.1619	22.2413	44.3295
758	459	2901	ENSGALT00000044787	ENSGALG00000026634	TMED4	1666.04	1770.79	714.499	1518.38	2118.06	1276.5	1623.55	1494.39	1207.31	1250.63	1290.01	1355.74
2481	2182	2888	ENSGALT00000014324	ENSGALG00000008812	tcp-1	350.952	242.98	509.276	317.971	291.692	307.824	280.671	210.044	338.917	287.813	303.604	380.892
4820	4521	2838	ENSGALT00000009326	ENSGALG00000005807	IPO7	156.017	112.741	349.572	150.808	139.684	170.245	84.5281	54.0305	233.515	133.803	120.596	211.683
460	161	2824	ENSGALT00000026062	ENSGALG00000016172	RPLP1	4520.26	4097.24	3662.28	4213.9	3103.6	2941.64	6496.79	4675.71	2761.12	6857.06	5693.69	2746.84
1560	1261	2822	ENSGALT00000023996	ENSGALG00000014873	GJA1	561.687	590.429	760.051	537.635	393.259	494.744	190.477	93.5107	581.785	249.075	217.24	490.879
541	242	2819	ENSGALT00000009835	ENSGALG00000006096	RPS13	3190.28	2946.82	6986.18	2798.5	3511.61	2890.5	4186.94	4225.57	3582.18	5965.04	5598.24	5366.82
558	259	2810	ENSGALT00000004446	ENSGALG00000002813	RPS10	3210.06	2750.76	2161.62	2606.47	2613.4	1862.22	3200.12	3334.17	1759.96	3351.61	3181.28	1974.86
959	660	2790	ENSGALT00000024146	ENSGALG00000014970	FSTL1	659.662	628.855	1067.75	1015.56	719.146	923.265	141.886	46.7693	1054.98	262.665	133.239	854.513
4420	4121	2789	ENSGALT00000006667	ENSGALG00000004195	KIF4A	149.054	104.745	244.75	162.589	128.705	143.089	75.9357	56.4498	180.504	97.6158	75.0096	157.204
1303	1004	2786	ENSGALT00000023442	ENSGALG00000014526	TPI1	646.876	555.267	728.624	666.642	592.049	608.267	686.789	606.704	674.773	557.801	554.189	610.548
1731	1432	2775	ENSGALT00000029403	ENSGALG00000010725	YWHAZ	454.188	357.209	730.081	465.549	447.763	355.504	338.814	229.356	405.914	487.132	444.006	535.336
2017	1718	2753	ENSGALT00000007299	ENSGALG00000004588	RPS14	381.529	395.093	464.491	384.971	402.101	235.36	549.798	541.629	276.109	477.85	594.69	358.351
6174	5875	2747	ENSGALT00000027439	ENSGALG00000016984	ZC3H13	84.7323	64.0228	142.31	112.33	89.4351	99.6459	36.2542	24.4342	119.765	56.5499	54.3388	80.668
5622	5323	2741	ENSGALT00000028034	ENSGALG00000017350	RRM1	121.51	88.8297	209.867	123.708	101.905	126.888	88.7438	68.8448	153.648	92.9484	72.6895	139.977
369	70	2732	ENSGALT00000013370	ENSGALG00000008212		10484.3	9826.74	8754.53	9376.23	9774.21	12264	13478.4	11878.7	9192.95	16423.9	17709.4	7428.95
969	670	2723	ENSGALT00000039926	ENSGALG00000002661	YWHAE	1052.17	847.354	1385.02	976.379	1005.67	853.468	561.461	449.554	997.183	1017.16	962.503	1021.1
2677	2378	2722.01	ENSGALT00000006588	ENSGALG00000004143	YWHAB	302.888	239.009	605.332	274.994	282.878	320.707	220.511	164.078	340.226	278.865	218.848	420.605
2904	2605	2711.55	ENSGALT00000036803	ENSGALG00000015770	APP	257.496	251.503	334.508	250.066	210.05	238.684	125.145	63.4897	218.768	103.024	62.1596	214.085
1893	1594	2703	ENSGALT00000018692	ENSGALG00000011464	EIF5	394.556	304.346	680.419	407.383	411.742	463.845	309.8	234.39	463.393	487.858	452.712	496.601
2423	2124	2697	ENSGALT00000000510	ENSGALG00000000377	HNRNPM	290.011	225.511	547.952	305.051	276.521	317.896	174.297	128.281	401.415	209.331	168.619	367.087
1087	788	2694.14	ENSGALT00000003591	ENSGALG00000002286	H3F3B	833.785	773.838	1344.3	821.371	931.736	767.33	822.82	747.34	799.421	846.922	875.861	1162.46
4872	4573	2680	ENSGALT00000015703	ENSGALG00000009641	COL1A2	179.386	245.957	207.729	140.792	182.06	112.733	99.5433	80.2993	171.124	73.9733	88.6901	125.956
2769	2470	2672	ENSGALT00000045265	ENSGALG00000028520	CST3	121.561	168.587	153.094	259.887	272.219	262.184	137.661	148.062	110.048	322.764	230.444	202.472
566	267	2665	ENSGALT00000045117	ENSGALG00000026852	CALR	2175.17	2737.37	1048.75	2397.9	2080.28	1875.38	1520.76	1390.51	1798.66	1544.21	1772.53	1790.63
3501	3202	2652.6	ENSGALT00000038829	ENSGALG00000009228	PARP1	206.333	151.189	278.247	199.02	175.681	165.596	119.836	75.845	186.126	163.882	171.795	188.659
3068	2769	2642	ENSGALT00000003725	ENSGALG00000002363	HSPA9	237.727	213.083	427.377	229.221	205.454	245.1	154.227	107.387	284.912	209.552	179.769	303.481
3754	3455	2627.9	ENSGALT00000021286	ENSGALG00000013041	CCT5	174.528	129.014	244.261	182.729	136.586	139.781	127.992	106.451	151.196	131.792	131.427	180.899
4904	4605	2619.71	ENSGALT00000003987	ENSGALG00000002531	SF3B3	131.121	96.4391	180.47	136.669	108.226	124.728	77.918	51.0788	130.392	78.5016	65.1584	113.249
7743	7444	2619	ENSGALT00000036256	ENSGALG00000005678	FLNB	64.1851	45.2097	78.2551	84.5229	47.1621	60.9777	12.7232	4.06057	66.3287	17.2364	10.5245	51.916
7005	6706	2602	ENSGALT00000020472	ENSGALG00000012533	MYH9	81.95	52.3906	121.681	93.2157	64.225	73.7813	28.1672	13.3471	99.3413	33.7325	22.4118	59.8173
7855	7556	2593	ENSGALT00000043356	ENSGALG00000025996	MKI67	72.2192	46.1356	102.381	82.4434	55.7807	53.9071	24.1234	15.5068	62.1657	59.0539	38.7938	51.3557
807	508	2578	ENSGALT00000000225	ENSGALG00000000169	PCNA	1400.83	925.862	2245.05	1219.17	1189.18	1354.11	942.905	992.607	1194.57	1310.5	1167.68	1763.39
1953	1654	2577	ENSGALT00000023233	ENSGALG00000014381	HNRNPAB	332.34	248.87	625.079	374.304	331.957	440.04	229.757	162.215	505.272	355.917	308.367	480.307
1845	1546	2574.46	ENSGALT00000039726	ENSGALG00000008684	EIF4A2	581.481	576.289	13.066	400.058	478.568	244.117	444.1	392.538	250.911	504.33	418.85	359.534
743	444	2567	ENSGALT00000000670	ENSGALG00000000489		1369.93	1035.23	556.219	1388.96	1100.93	906.866	881.841	1187.41	815.186	1218.67	1171.54	822.127
1268	969	2558	ENSGALT00000033478	ENSGALG00000008220	BZW1	566.174	381.592	1063.38	634.194	476.167	669.481	364.438	261.015	733.003	505.336	444.955	785.971
1966	1667	2553	ENSGALT00000014525	ENSGALG00000008939	FUBP1	338.31	208.436	483.373	367.926	244.475	393.279	138.136	99.5046	452.072	177.239	132.999	337.561
5136	4837	2539	ENSGALT00000016835	ENSGALG00000010341	XPO5	126.714	92.0628	210.81	126.105	98.9076	119.595	72.7657	41.2706	138.125	60.7867	49.3621	138.614
4386	4087	2539	ENSGALT00000013282	ENSGALG00000008169	GDI2	148.042	119.201	204.398	149.246	129.255	128.668	118.009	109.082	147.206	126.239	135.88	137.885
2783	2484	2535.77	ENSGALT00000045607	ENSGALG00000012225	CIRBP	250.742	221.02	349.945	245.247	225.362	188.593	181.625	162.978	187.551	157.344	129.841	241.308
3278	2979	2526	ENSGALT00000039619	ENSGALG00000010235	DDX19B	192.313	154.905	348.799	203.708	185.419	217.767	137.734	101.144	246.203	126.113	164.413	238.887
2017	1718	2518	ENSGALT00000009501	ENSGALG00000005907	RPN1	363.671	433.371	646.016	352.11	339.256	428.182	284.273	246.754	496.109	318.659	296.569	477.322
2070	1771	2516	ENSGALT00000005672	ENSGALG00000003584	KPNA2	412.138	339.199	705.348	341.301	332.438	375.662	365.319	317.23	427.65	450.156	389.711	458.467
2996	2697	2513	ENSGALT00000026538	ENSGALG00000016447	PDIA6	242.739	286.943	306.534	223.85	194.733	203.856	144.424	108.393	240.426	180.381	148.208	216.359
5091	4792	2506	ENSGALT00000013044	ENSGALG00000008038	SF3B1	122.198	95.6814	171.366	125.635	92.4905	97.7831	65.8815	36.2419	129.918	79.7614	56.9436	114.247
1900	1601	2503	ENSGALT00000003859	ENSGALG00000002448	CCT6	426.24	332.72	492.922	375.591	318.007	308.158	296.387	250.177	354.99	334.788	310.253	355.861
4550	4251	2498.79	ENSGALT00000017840	ENSGALG00000010961	IGF2BP3	135.639	108.01	322.75	141.216	142.719	160.042	102.475	63.3164	190.762	135.598	169.127	195.562
3785	3486	2487	ENSGALT00000045488	ENSGALG00000026445	CALM1	273.356	217.494	405.453	171.393	179.868	164.38	166.043	119.739	217.675	224.264	246.45	206.085
1256	957	2475	ENSGALT00000038016	ENSGALG00000023199	HNRNPDL	584.006	484.813	777.248	621.311	474.485	533.732	396.09	335.605	560.099	569.393	516.249	562.094
5356	5057	2469	ENSGALT00000001233	ENSGALG00000000840	KDM1A	114.396	85.4479	202.084	117.293	106.518	117.613	88.835	65.2216	146.427	65.0047	62.4961	131.708
558	259	2465	ENSGALT00000018788	ENSGALG00000011523	RPL14	2021.41	1823	1966.51	2286.45	1767.81	1849.09	1982.83	2097.82	1390.76	4217.63	4331.55	1853.26
4129	3830	2461	ENSGALT00000037609	ENSGALG00000015691	SMC2	133.144	97.019	5.69347	154.368	103.508	107.7	70.2598	55.0219	154.337	108.856	108.957	107.261
8308	8009	2454	ENSGALT00000005664	ENSGALG00000003578	fn1	111.967	132.453	155.652	73.6108	60.7968	75.4896	34.1984	23.8049	101.785	21.407	20.895	71.9379
1146	847	2446	ENSGALT00000036909	ENSGALG00000016433	YWHAQ	863.783	704.661	1365.5	693.775	746.698	673.693	453.572	309.832	922.425	650.475	546.169	877.973
375	76	2441	ENSGALT00000039072	ENSGALG00000008620	RPL39	10060.2	9308.43	11706.8	7716.13	9496.83	8687.76	14668.1	19697.8	8504.01	11296.2	14095.3	9724.89
1044	745	2434	ENSGALT00000014763	ENSGALG00000009071	HMGB3	693.257	502.129	979.84	784.892	652.317	665.652	390.121	286.162	644.491	571.377	414.204	768.903
1419	1120	2415	ENSGALT00000023132	ENSGALG00000014309	RPLP2	467.452	435.588	655.323	518.018	468.924	478.437	576.137	578.103	514.424	826.37	698.077	554.314
1864	1565	2411	ENSGALT00000020466	ENSGALG00000012529	EIF3D	395.73	290.939	434.704	370.108	332.116	327.012	269.947	215.938	316.544	321.229	346.336	337.175
2916	2617	2408	ENSGALT00000013472	ENSGALG00000008279	Lrrn1	120.594	95.0355	187.149	221.054	172.519	169.391	59.9512	28.9776	119.5	130.54	81.0533	131.532
1711	1412	2398	ENSGALT00000037092	ENSGALG00000016088	CCT7	403.185	325.365	541.742	408	354.55	318.713	276.613	225.948	401.277	330.445	290.257	417.065
735	436	2396	ENSGALT00000021124	ENSGALG00000012952	BASP1	1200.18	972.812	1629.41	1320.22	1046.89	1123.77	560.438	434.585	1185.13	768.569	712.646	987.335
3323	3024	2366	ENSGALT00000024196	ENSGALG00000015003	ATP1A1	232.546	238.758	301.831	187.966	142.034	168.066	122.846	79.2589	215.097	122.815	118.611	170.565
3637	3338	2358	ENSGALT00000021945	ENSGALG00000013464	ANP32E	198.962	144.653	357.844	169.708	164.062	167.298	107.328	66.8755	234.38	179.745	148.487	208.724
861	562	2356	ENSGALT00000035687	ENSGALG00000022145	CDCA8	1007.05	750.659	1460.57	1007.13	929.466	1234.46	1045.12	820.831	969.902	1459.62	1449.03	1289.9
4098	3799	2312.1	ENSGALT00000008967	ENSGALG00000005587	EIF4G2	178.611	171.686	588.14	146.212	231.755	314.206	262.917	191.232	412.531	267.516	152.239	406.696
2918	2619	2299.67	ENSGALT00000003093	ENSGALG00000001986	VCP	204.176	171.448	7.68818	210.948	200.343	179.024	145.493	125.65	236.008	170.563	180.437	191.371
508	209	2298	ENSGALT00000023944	ENSGALG00000014833	RPL37	2629.46	2596.64	61.276	2641.49	2864.45	1383.41	3094.07	3812.41	1536.03	8468.33	10164.4	2526.29
5875	5576	2287	ENSGALT00000008250	ENSGALG00000005139	chc	105.949	69.9859	158.197	98.5346	79.6555	82.8788	49.7898	28.8667	106.062	58.3547	47.9813	93.1595
901	602	2284	ENSGALT00000028340	ENSGALG00000014023	H2AFZ	931.718	856.889	1246.23	911.476	895.964	657.677	1067.99	889.423	711.51	1157.97	1196.94	908.163
3296	2997	2280	ENSGALT00000018287	ENSGALG00000011214	SERPINH1	180.476	223.598	119.36	182.765	176.58	120.363	122.422	92.981	100.517	95.5569	86.4253	91.7694
4204	3905	2253	ENSGALT00000027289	ENSGALG00000016887		154.326	101.157	257.002	138.607	131.71	148.972	93.6559	79.4023	178.06	144.923	133.068	155.972
499	200	2250	ENSGALT00000010956	ENSGALG00000006771	RPS15A	2960.54	2865.94	2848.62	2702.7	2748.83	2072.02	3422.08	3446.72	1619.62	5475.36	6065.04	2503.69
3827	3528	2248	ENSGALT00000007605	ENSGALG00000004769	PSAP	170.062	208.326	298.299	153.078	147.325	146.365	104.238	67.0583	182.044	105.721	77.3451	182.48
1352	1053	2247.79	ENSGALT00000018872	ENSGALG00000011570	ILF2	419.182	400.759	650.766	512.828	440.734	546.456	415.861	458.598	472.873	397.877	371.286	594.331
7592	7293	2236	ENSGALT00000010045	ENSGALG00000006221	KIF1A	36.3235	36.6295	1.8984	73.6565	53.419	72.8725	32.0278	21.2797	76.9107	28.3107	20.9002	64.4111
2714	2415	2234	ENSGALT00000016382	ENSGALG00000010079	HP1BP3	202.263	158.481	338.1	222.234	194.482	239.829	123.572	81.5993	277.97	154.049	128.439	241.964
1657	1358	2228.87	ENSGALT00000020914	ENSGALG00000012821	TUBB2B	374.597	319.11	425.015	394.303	400.589	373.799	372.11	325.339	413.408	391.566	354.608	356.44
2861	2562	2215.35	ENSGALT00000020859	ENSGALG00000012784	TXNDC5	187.426	220.655	316.835	207.735	181.672	201.759	119.326	84.501	228.22	153.042	114.746	240.04
4510	4211	2210	ENSGALT00000003039	ENSGALG00000001962	PTBP1	144.949	107.316	205.736	126.082	102.054	104.363	68.8419	38.8327	117.711	62.6782	55.1814	114.256
6078	5779	2200	ENSGALT00000016215	ENSGALG00000009975	CCT2	103.405	80.5999	144.584	91.4567	86.4238	72.9952	85.0449	76.424	102.62	86.4681	95.4507	101.936
1112	813	2199	ENSGALT00000006294	ENSGALG00000003947	HNRNPH3	706.793	538.908	1109.79	649.801	593.398	877.862	412.459	310.836	1060.36	571.864	475.924	877.312
7632	7333	2191	ENSGALT00000005992	ENSGALG00000003776	PRRC2B	55.9525	33.4508	84.2542	71.7804	39.5315	53.7696	11.8394	1.66047	66.9643	13.8502	10.5385	45.3972
6987	6688	2186.67	ENSGALT00000044193	ENSGALG00000028755	SNRNP200	72.5665	59.0609	48.9935	78.5475	71.3671	68.5337	54.3197	41.7448	75.6621	48.1254	41.8005	73.0212
7301	7002	2181.02	ENSGALT00000003619	ENSGALG00000002301	CNOT1	75.8201	48.144	129.268	74.8313	45.0379	74.5951	26.3561	9.3813	93.0877	26.0501	22.8848	70.9956
5160	4861	2162	ENSGALT00000013878	ENSGALG00000008520	EIF4G1	94.7789	74.0075	3.34663	106.85	90.0597	107.918	47.2178	28.1689	113.881	45.455	31.7954	97.0529
851	552	2149	ENSGALT00000034053	ENSGALG00000005338	RPS21	1000.41	1077.96	569.353	935.282	936.888	596.916	1011.5	966.117	447.325	1637.76	1778.45	519.443
1537	1238	2147.63	ENSGALT00000039969	ENSGALG00000001381	ACTG1	372.31	318.137	581.863	416.758	411.631	652.627	365.994	379.757	491.741	415.515	268.649	604.418
1452	1153	2142	ENSGALT00000037892	ENSGALG00000012135	ATF4	476.979	391.545	517.689	446.309	447.921	353.456	420.43	337.101	362.118	431.182	320.791	367.651
292	292	2137	ENSGALT00000003378	ENSGALG00000002157	RPS17L	1933.66	1888.94	1292.05	1758.2	1600.38	1367.29	2430.1	2122.28	1004.91	2615.2	2885.63	1081.59
4321	4022	2137	ENSGALT00000040760	ENSGALG00000009153	COPA	131.265	112.189	171.686	127.646	111.725	111.556	91.2497	74.6759	130.8	72.6688	54.7267	115.129
932	633	2121	ENSGALT00000039466	ENSGALG00000007606	PGAM1	713.086	625.482	956.086	804.975	833.051	809.271	854.94	826.798	832.303	484.362	385.614	805.242
2193	1894	2120	ENSGALT00000044251	ENSGALG00000025822	CYP1B1	91.7655	86.6213	176.17	268.907	177.004	285.126	45.163	27.8019	113.101	78.4186	61.062	217.602
1541	1242	2108	ENSGALT00000007808	ENSGALG00000004889	SLC2A1	324.233	402.877	403.396	407.75	301.311	590.858	140.749	98.9831	483.16	152.013	81.9602	389.576
2365	2066	2102	ENSGALT00000009812	ENSGALG00000006080	GPC4	155.855	155.185	231.952	244.426	183.195	223.753	75.3722	53.5595	184.157	93.85	62.1696	201.843
1759	1460	2101	ENSGALT00000039077	ENSGALG00000005597	CNN3	324.881	275.705	524.05	345.715	330.271	407.86	276.65	203.376	399.385	351.637	292.031	420.506
1733	1434	2099	ENSGALT00000012893	ENSGALG00000007936	PGK1	370.583	283.084	433.141	351.648	293.918	345.675	296.244	273.577	346.874	316.605	287.663	395.804
647	348	2096	ENSGALT00000014314	ENSGALG00000008806	RPL12	1653.16	1427.39	1416.33	1446.96	1420.92	1143.81	1570.43	1390.05	1064.74	2138.55	2073.63	1125.43
1884	1585	2092	ENSGALT00000008512	ENSGALG00000005309	TKT	324.843	264.154	442.212	317.087	280.078	243.493	273.539	249.872	338.362	281.823	271.017	317.08
1350	1051	2085	ENSGALT00000003653	ENSGALG00000002321	GOT2	541.546	394.687	815.258	476.594	440.365	478.719	333.975	245.427	529.743	349.129	325.047	500.629
765	466	2077	ENSGALT00000038698	ENSGALG00000001039	RPL35	1004.99	925.321	793.269	1070.77	924.233	562.561	1160.64	1130.43	497.784	1200.42	1414.74	718.716
9536	9237	2065	ENSGALT00000045986	ENSGALG00000027308	LRP1	37.7188	34.3647	14.9512	53.7075	31.6388	38.3701	7.75938	3.72333	40.0824	6.70403	3.46188	34.0747
3983	3684	2064	ENSGALT00000037052	ENSGALG00000015970	COL9A1	110.36	126.064	143.327	134.597	115.242	156.775	70.4387	49.9253	180.569	101.374	54.9738	119.512
2384	2085	2061	ENSGALT00000013739	ENSGALG00000008432	AP2M1	222.824	181.273	7.88538	237.475	208.154	216.416	187.481	158.804	278.555	173.468	178.93	252.962
4468	4169	2049.06	ENSGALT00000018201	ENSGALG00000011165	SEC31A	110.966	99.3636	170.863	118.078	103.775	113.818	69.5828	42.8893	141.069	65.5366	56.9614	113.018
1766	1467	2042	ENSGALT00000021744	ENSGALG00000013313		323.422	254.225	174.007	334.404	286.34	209.642	252.501	190.756	231.134	176.119	157.671	216.664
631	332	2036	ENSGALT00000019972	ENSGALG00000012229	RPS29	1821.62	1718.92	1159.82	1473.28	1727.07	1445.72	2775.97	4648.43	705.672	1576.56	1594.03	1003.83
1650	1351	2036	ENSGALT00000025507	ENSGALG00000015821	CCT8	424.155	321.866	741.7	362.049	338.731	385.939	295.023	268.959	524.529	467.556	409.481	540.236
3485	3186	2031.46	ENSGALT00000003856	ENSGALG00000002447	CTNNA1	139.778	105.066	175.957	153.182	123.445	125.758	85.7674	54.2425	155.66	94.2837	78.4546	131.138
2892	2593	2026	ENSGALT00000007105	ENSGALG00000004465	PALD1	140.949	133.386	216.312	187.708	157.443	184.559	116.57	105.779	195.441	102.587	83.8589	184.088
4406	4107	2016	ENSGALT00000003362	ENSGALG00000002144	THRAP3	111.27	85.3229	163.414	117.926	90.4867	101.867	57.938	35.863	126.565	63.1801	47.1057	103.568
1786	1487	2011	ENSGALT00000039360	ENSGALG00000009309	EIF5A2	344.637	238.258	20.0181	324.898	275.816	268.017	154.57	104.438	391.03	231.453	213.254	364.43
1799	1500	2010	ENSGALT00000042927	ENSGALG00000027891	NREP	333.38	292.017	23.5366	321.922	433.922	371.679	280.721	231.775	373.296	394.262	316.576	391.459
1503	1204	2005	ENSGALT00000038969	ENSGALG00000008530	EIF4A3	418.221	312.214	561.593	400.068	394.216	459.115	328.209	285.829	392.941	345.222	278.872	493.423
3582	3283	1995	ENSGALT00000001959	ENSGALG00000001283	SRRM1	124.53	97.5197	228.519	145.988	139.249	151.033	63.8706	46.1981	155.981	76.0313	64.9353	140.312
4543	4244	1990	ENSGALT00000008940	ENSGALG00000005573	NOLC1	105.321	68.7356	156.548	112.648	79.8836	90.4364	54.6352	31.8363	107.519	68.1924	60.2778	91.4484
4688	4389	1990	ENSGALT00000012832	ENSGALG00000007905	LAMB1	95.8238	92.439	113.641	108.926	81.3893	79.5266	46.4634	32.5853	94.5136	40.8767	25.136	78.341
5366	5067	1984	ENSGALT00000018432	ENSGALG00000011300	TOP2B	83.5284	65.5649	173.268	94.0668	85.3726	90.0304	43.9299	28.6046	114.831	79.3597	64.3713	108.633
2862	2563	1980	ENSGALT00000007851	ENSGALG00000004908		190.219	157.675	306.558	185.593	191.732	223.577	164.667	116.06	251.565	182.669	161.363	219.158
3901	3602	1979	ENSGALT00000003157	ENSGALG00000002030	AHCY	149.533	102.402	224.425	131.992	113.733	142.414	117.642	88.7207	169.946	116.808	107.568	150.798
3629	3330	1973	ENSGALT00000009723	ENSGALG00000006037	MCM2	123.213	90.3351	212.769	142.34	116.283	148.114	83.9162	63.8928	164.037	95.4188	73.6216	157.797
1447	1148	1969	ENSGALT00000045371	ENSGALG00000026077	ALDOC	329.634	248.358	533.964	412.049	356.852	486.384	314.21	266.836	483.218	278.029	225.16	503.941
717	418	1964.81	ENSGALT00000007941	ENSGALG00000004952		905.772	887.564	815.679	1129.25	867.914	642.605	832.208	1010.23	591.266	1565.13	1876.64	727.008
1814	1515	1953	ENSGALT00000034001	ENSGALG00000021128	FSCN1	211.923	174.227	272.675	309.696	265.728	332.242	118.414	66.9758	273.363	143.849	78.4483	231.84
17859	17560	1950	ENSGALT00000022100	ENSGALG00000013579	FAT1	28.7512	29.3762	49.8198	26.6781	17.9478	18.6794	10.9937	8.14448	23.2219	12.7552	7.618	21.4715
2547	2248	1934	ENSGALT00000012159	ENSGALG00000007520	SSRP1	187.027	148.998	282.383	206.683	182.551	198.897	122.598	101.582	221.185	140.283	132.765	199.765
2371	2072	1934	ENSGALT00000006615	ENSGALG00000004160	G3BP1	205.231	144.742	314.888	224.24	168.525	257.726	104.855	66.704	246.4	151.508	127.323	222.898
5661	5362	1933	ENSGALT00000010117	ENSGALG00000006259	KIRREL	71.2461	66.2863	121.551	86.6065	81.3806	92.2088	42.2092	27.4093	91.8314	31.7669	20.9724	84.187
472	173	1929	ENSGALT00000039748	ENSGALG00000002837	RPL27	3629.99	3336.9	2731	2678.75	2922.46	2109.69	2710.19	3387.01	1892.48	4209.81	4285.21	2165.9
2246	1947	1927	ENSGALT00000013753	ENSGALG00000008443	ARHGDIA	241.975	205.341	439.458	237.772	249.481	339.595	234.842	208.516	327.241	170.719	140.698	315.91
1254	955	1926	ENSGALT00000001462	ENSGALG00000000990	SRSF6	532.852	445.8	762.928	484.505	539.057	519.056	230.066	163.848	543.792	340.885	236.063	520.161
4570	4271	1923	ENSGALT00000014020	ENSGALG00000008609	PTK7	84.7609	95.3658	113.66	108.167	89.0036	102.084	52.9913	34.711	93.1938	36.3779	23.0852	89.7598
3551	3252	1919	ENSGALT00000039950	ENSGALG00000003475	acl	137.284	92.4318	229.155	141.765	114.64	132.635	61.8229	36.1941	174.944	77.4904	63.7515	150.517
2803	2504	1915	ENSGALT00000006789	ENSGALG00000004269	EIF3B	203.65	160.027	326.774	183.73	200.119	163.291	155.598	112.653	205.586	209.987	206.457	202.652
520	221	1905.97	ENSGALT00000012060	ENSGALG00000023740	HBZ	5478.17	6197.8	5503.54	2071.91	1798.31	2607.79	6913.83	5667.18	4871.23	5093.98	4100.92	2086.14
2199	1900	1894	ENSGALT00000005471	ENSGALG00000003454	ZNF207	249.435	209.462	305.138	239.481	224.442	229.027	184.011	195.291	240.977	178.712	167.46	224.104
6411	6112	1892	ENSGALT00000008185	ENSGALG00000005105	TPR	60.3816	30.74	89.6683	74.3675	41.621	56.628	13.9778	4.68337	80.1022	35.884	22.6716	48.5109
416	117	1888	ENSGALT00000001015	ENSGALG00000000719	RPL22	3932.08	3510.43	5032.15	3876.69	3895.18	4217.37	4489.61	6029.68	3594.95	5851.96	5438.89	4665.74
4034	3735	1884	ENSGALT00000002634	ENSGALG00000001717	SLC16A1	114.245	136.954	211.754	121.181	96.5261	109.037	85.9537	51.7315	136.846	76.761	69.7766	138.045
2176	1877	1881.83	ENSGALT00000001334	ENSGALG00000000907	KARS	266.69	221.924	426.202	240.858	227.237	284.799	192.041	185.893	386.856	308.262	342.394	302.884
3286	2987	1879.01	ENSGALT00000036519	ENSGALG00000016899	DCT	99.5003	133.632	179.543	151.126	113.036	159.049	84.4369	67.978	125.298	108.226	81.2206	156.313
15750	15451	1874	ENSGALT00000006223	ENSGALG00000003910	UBR4	26.3995	17.2158	36.6826	29.1379	18.3946	19.5929	8.20065	4.48637	27.803	8.18053	5.41545	19.8018
2395	2096	1873.71	ENSGALT00000010768	ENSGALG00000006657	MAPRE1	207.71	162.829	351.741	214.761	208.145	224.434	189.079	155.622	252.69	185.023	210.454	253.987
4465	4166	1873	ENSGALT00000013105	ENSGALG00000008072	CHRDL1	8.74095	10.8693	20.6048	108.01	96.5776	138.296	17.5372	18.2544	43.6369	73.7489	47.5899	120.576
370	71	1866	ENSGALT00000018702	ENSGALG00000011472	RPL37A	6449.57	5932.22	7119.97	6313.91	7277.32	3411.04	7709.34	6583.03	3972.49	9318.26	16161.3	5769.14
1480	1181	1863.86	ENSGALT00000020563	ENSGALG00000012591	HNRNPK	414.077	302.121	22.6641	379.148	359.114	394.535	222.293	148.703	570.068	318.629	242.366	451.28
9148	8849	1861	ENSGALT00000037581	ENSGALG00000023073	AKAP12	77.8106	72.2315	123.994	50.524	50.3	40.0124	24.7448	17.2845	62.7107	29.4851	27.765	40.7143
2988	2689	1848.2	ENSGALT00000016121	ENSGALG00000009913	SMARCA5	145.158	80.9316	301.883	165.121	118.359	196.93	52.415	26.6387	241.101	124.582	73.3179	217.652
3851	3552	1838	ENSGALT00000004888	ENSGALG00000003092	ERLIN2	118.329	108.52	237.718	124.313	120.389	143.382	77.5004	53.8555	173.398	118.855	92.4271	155.413
1560	1261	1833	ENSGALT00000011703	ENSGALG00000007233	P4HB	381.122	414.852	603.869	349.215	356.537	391.078	167.386	113.331	431.499	231.148	172.439	419.163
2027	1728	1832.94	ENSGALT00000039166	ENSGALG00000005393	ARF1	284.867	246.491	474.339	254.829	247.759	243.298	192.725	162.506	315.1	266.751	251.71	303.166
4293	3994	1832	ENSGALT00000008713	ENSGALG00000005425	OGT	111.379	123.686	173.713	110.195	124.457	107.675	56.2392	40.8623	100.648	43.6838	35.0945	114.02
1865	1566	1830	ENSGALT00000024179	ENSGALG00000014991	HDAC2	297.183	251.231	469.459	280.74	278.045	239.031	182.801	146.709	290.401	307.098	317.187	331.427
1946	1647	1828	ENSGALT00000020091	ENSGALG00000012296	EIF3L	290.343	226.026	387.632	266.642	224.636	226.373	196.606	167.898	259.48	225.109	210.011	258.414
1309	1010	1821	ENSGALT00000018773	ENSGALG00000011514	SLC25A3	503.439	437.745	800.546	433.146	408.885	401.326	520.19	366.534	461.73	420.515	512.377	594.398
3439	3140	1818.69	ENSGALT00000040794	ENSGALG00000000988	EFTUD2	128.966	103.142	220.49	139.147	106.651	137.929	95.2483	72.6698	154.973	86.4902	72.7308	153.064
2814	2515	1814	ENSGALT00000008105	ENSGALG00000005054	DKC1	159.163	126.394	246.005	173.279	133.956	198.73	113.23	90.3734	203.152	92.1597	127.782	169.077
869	570	1805	ENSGALT00000001004	ENSGALG00000000708	NUCKS1	547.825	282.636	1081.8	760.76	515.202	695.468	294.148	232.731	784.465	626.988	1822.34	557.626
1817	1518	1804	ENSGALT00000009864	ENSGALG00000006110	PLK1	293.927	237.739	477.691	285.503	262.869	248.969	272.052	203.204	278.035	194.741	166.417	306.579
13472	13173	1789	ENSGALT00000038383	ENSGALG00000010316	FRAS1	6.76405	5.9076	8.68404	32.6265	20.2663	27.6257	3.95115	2.25407	13.9468	7.05741	5.17865	22.3044
2027	1728	1787	ENSGALT00000007948	ENSGALG00000004956	GPI	280.206	191.465	387.289	248.443	225.864	194.698	187.637	133.387	266.135	211.701	227.308	284.912
6630	6331	1786.86	ENSGALT00000013551	ENSGALG00000008325	CKAP5	57.1172	32.2374	89.3468	67.8054	33.2191	46.7463	16.5806	8.03409	58.386	25.6988	16.3287	48.4543
2924	2625	1784	ENSGALT00000005246	ENSGALG00000003311	FGFR1	131.05	129.766	184.403	163.272	174.784	207.182	74.2332	53.4654	190.264	62.2208	46.4941	171.749
10637	10338	1774.87	ENSGALT00000038914	ENSGALG00000002747	FASN	40.8639	33.9451	50.8054	41.2453	41.5929	26.7081	30.0073	20.8678	27.9359	32.8906	29.5508	23.622
1257	958	1774	ENSGALT00000011975	ENSGALG00000007403	PEBP1	481.058	439.416	457.588	444.87	366.713	296.857	481.737	412.853	329.161	397.146	439.494	339.043
9622	9323	1774	ENSGALT00000039988	ENSGALG00000002922	NOTCH2	48.087	40.9061	68.312	45.7134	29.6998	35.9805	20.2377	9.94423	46.7299	10.8768	8.11753	38.6579
5048	4749	1769.68	ENSGALT00000015639	ENSGALG00000009598	EPRS	93.402	69.3017	132.064	89.5238	72.1847	76.9526	49.2974	31.0115	93.5302	72.1784	61.4883	80.3877
961	662	1750	ENSGALT00000043033	ENSGALG00000026978	RPL29	558.938	536.899	486.512	635.076	657.731	419.857	590.157	565.99	305.947	1187.68	1304.21	435.232
4992	4693	1749.4	ENSGALT00000020002	ENSGALG00000012247	DDX17	90.3989	86.5618	112.202	89.5538	87.3845	64.3961	49.0135	22.2027	66.7446	42.6941	31.3243	64.3384
4645	4346	1746	ENSGALT00000006443	ENSGALG00000004048	PTPRS	91.4315	77.1227	111.022	96.5161	56.3185	63.8891	22.4308	6.61104	85.3244	20.1094	10.0558	65.9325
6713	6414	1746	ENSGALT00000004326	ENSGALG00000002745	GLG1	62.2641	66.7667	70.0726	65.3974	49.1001	49.2519	24.0951	11.4735	59.1982	21.6424	17.3664	46.4986
1515	1216	1742	ENSGALT00000010428	ENSGALG00000006457	RBMX	340.818	288.362	481.332	344.16	315.719	387.672	240.943	205.537	371.051	356.608	346.684	385.632
3256	2957	1735	ENSGALT00000007370	ENSGALG00000004626	RBM5	125.854	126.97	106.694	140.959	135.585	118.71	80.2541	62.1276	83.6353	57.4421	45.2391	74.6182
4416	4117	1733.82	ENSGALT00000006981	ENSGALG00000004377	XPO1	105.012	76.8251	174.377	101.174	82.979	77.3108	35.3081	24.2311	92.1582	52.1863	37.1529	102.459
1230	931	1732	ENSGALT00000025971	ENSGALG00000016122	EIF3H	375.233	268.363	557.483	446.934	381.408	625.613	384.01	293.696	569.936	447.136	461.399	503.275
5400	5101	1729	ENSGALT00000008465	ENSGALG00000005278	CDH11	113.279	130.568	170.01	81.4301	101.57	75.1453	43.5325	28.4768	99.7459	47.0613	35.3145	101.586
9312	9013	1728.08	ENSGALT00000036568	ENSGALG00000016808		42.9461	32.2478	69.7148	46.0617	31.09	38.4269	15.8593	8.24797	47.853	21.4355	15.5517	39.5397
907	608	1726.55	ENSGALT00000043750	ENSGALG00000028992		684.259	608.942	981.985	682.213	660.371	427.173	785.264	737.869	402.337	1023.01	1264.81	761.44
2300	2001	1723	ENSGALT00000043978	ENSGALG00000028517	EIF1	207.781	187.632	354.084	206.863	219.371	166.648	267.042	192.48	182.713	249.963	217.071	252.551
4218	3919	1715	ENSGALT00000010718	ENSGALG00000006634	DNMT3B	122.7	81.2291	199.427	105.132	78.4904	88.3414	83.6055	45.1328	133.105	52.8063	53.1732	101.001
3203	2904	1714	ENSGALT00000024417	ENSGALG00000015132	CDH2	140.14	143	283.492	141.795	89.2464	144.847	58.4703	32.9916	179.694	84.803	53.0387	168.293
3193	2894	1704	ENSGALT00000020663	ENSGALG00000012659	CKAP4	148.828	173.844	270.538	141.454	146.618	150.413	96.0427	70.6769	173.546	122.996	103.497	194.114
3041	2742	1703	ENSGALT00000005499	ENSGALG00000003473	SFRP1	137.231	152.776	222.925	149.208	128.553	124.196	84.3686	54.7678	133.724	82.324	73.8597	132.339
2996	2697	1700	ENSGALT00000022585	ENSGALG00000013935	BCLAF1	142.834	105.041	244.162	151.431	128.771	161.347	69.325	42.0186	191.589	103.53	79.6371	162.685
1794	1495	1695	ENSGALT00000026357	ENSGALG00000016340	EIF2S3	292.917	239.418	405.86	272.379	251.426	225.137	200.401	142.388	272.244	252.256	258.101	294.417
1135	836	1689	ENSGALT00000029152	ENSGALG00000000905	PSMB4	410.374	366.36	592.266	485.365	447.358	400.32	569.389	599.969	304.597	381.981	409.28	505.697
688	389	1689	ENSGALT00000003460	ENSGALG00000002210	PPIB	859.989	1191.55	848.856	1043.1	996.036	969.552	1041.34	1035.96	696.53	763.215	660.372	806.52
2749	2450	1680	ENSGALT00000027509	ENSGALG00000017025	CKAP2	157.724	119.253	260.019	164.736	146.767	149.288	87.1539	68.968	174.789	158.216	146.4	160.295
5260	4961	1678.44	ENSGALT00000006920	ENSGALG00000004338	COL18A1	68.2516	84.1604	116.392	81.2798	68.8807	79.9124	42.5574	26.7074	84.8752	31.0109	18.298	71.9987
2576	2277	1676	ENSGALT00000020490	ENSGALG00000012546	MCM5	141.94	111.724	199.589	176.83	139.138	146.075	116.493	95.2226	140.649	116.824	110.243	166.392
2463	2164	1674	ENSGALT00000023158	ENSGALG00000014331	FKBP4	194.534	157.516	285.506	185.842	159.614	152.918	128.984	107.352	184.289	153.232	145.799	196.735
907	608	1674	ENSGALT00000002525	ENSGALG00000001654	C1QBP	718.494	638.476	923.668	661.45	600.352	627.426	673.973	527.544	646.244	865.075	899.364	753.477
5321	5022	1673.64	ENSGALT00000016201	ENSGALG00000009967	LRPPRC	83.3869	58.6301	145.811	80.0628	64.121	85.3327	42.9643	31.243	84.3539	63.6509	58.3684	90.092
3765	3466	1666	ENSGALT00000002528	ENSGALG00000001656	40057	95.2878	89.9418	127.675	115.476	112.538	91.9806	70.3763	48.0116	97.745	50.7977	42.1321	94.3499
1270	971	1660.38	ENSGALT00000028029	ENSGALG00000017347	HBE	895.24	1064.74	1076.02	410.804	361.461	454.96	1053.5	1217.72	768.008	1232.39	921.719	395.607
3480	3181	1659	ENSGALT00000022801	ENSGALG00000014083	ASUN	133.723	104.152	238.023	125.293	125.666	127.091	74.2675	54.1935	156.098	124.86	104.38	161.769
12300	12001	1656	ENSGALT00000025190	ENSGALG00000015624	VCAN	25.1415	21.0652	0.807561	33.1504	18.0129	18.4868	6.54996	3.8537	18.4044	7.7599	5.7288	18.9969
761	462	1652	ENSGALT00000003929	ENSGALG00000002495	CHCHD2	955.366	869.305	1383.01	859.04	874.45	828.923	1156.83	1052.14	830	1345.88	1337	980.775
8414	8115	1642	ENSGALT00000010046	ENSGALG00000006222	ANKRD11	35.8494	27.7598	64.5549	48.6105	33.1019	40.2196	14.8781	10.9507	50.7967	21.9905	45.1847	38.56
3028	2729	1638	ENSGALT00000040554	ENSGALG00000007659	HYOU1	128.891	140.58	188.537	144.197	112.457	124.476	57.0608	39.7255	156.955	79.7411	63.4704	124.697
3665	3366	1635	ENSGALT00000011573	ENSGALG00000007145	ITGB1	115.476	135.608	209.414	116.694	109.564	138.767	60.4579	36.428	144.71	79.9264	46.0755	141.042
4729	4430	1629.4	ENSGALT00000043409	ENSGALG00000006267	TPX2	94.1958	80.2491	161.172	88.3628	88.694	87.9171	86.915	68.4645	99.3297	105.631	119.822	96.9662
1450	1151	1628	ENSGALT00000023521	ENSGALG00000014589		296.442	223.988	417.397	339.801	354.485	456.077	309.499	284.143	343.298	214.79	181.048	358.235
362	63	1627	ENSGALT00000002220	ENSGALG00000001465	RPL38	5767.42	5562.24	7081.86	6204.29	6138.88	5118.84	7200.18	6864.59	4744.97	11807.9	12461	6039.97
1607	1308	1615	ENSGALT00000041222	ENSGALG00000000812	OAZ1	316.438	277.126	450.785	296.627	335.236	327.542	352.587	394.164	293.755	468.809	418.868	414.206
2918	2619	1605	ENSGALT00000010167	ENSGALG00000006294	PSMD2	134.508	107.213	4.88991	147.226	128.727	299.263	95.1726	72.9595	160.563	90.5059	62.0663	161.469
1326	1027	1603	ENSGALT00000019782	ENSGALG00000012109	EIF3M	375.096	309.082	767.242	374.98	371.521	466.049	348.322	280.802	600.375	564.065	574.991	574.276
1874	1575	1599	ENSGALT00000029758	ENSGALG00000022293	PSMD3	221.042	194.606	276.022	243.901	214.505	197.515	225.571	182.423	214.427	156.563	154.642	211.524
895	596	1595	ENSGALT00000008011	ENSGALG00000005002	VDAC2	673.428	500.525	1043.9	642.924	607.286	596.81	533.821	358.777	710.254	662.671	524.908	828.918
3423	3124	1593	ENSGALT00000018328	ENSGALG00000011238	WLS	142.994	148.08	4.21025	122.504	125.766	116.716	106.247	66.4991	155.178	67.6203	55.104	143.162
2088	1789	1589	ENSGALT00000022274	ENSGALG00000019514	CNDP2	108.932	88.2711	184.962	213.383	191.223	205.792	104.63	82.8679	132.791	114.877	110.822	165.33
2841	2542	1585	ENSGALT00000025333	ENSGALG00000015709	TACC3	148.5	100.525	254.08	149.796	125.749	161.992	87.1464	67.2702	170.057	152.427	145.714	162.953
2262	1963	1583	ENSGALT00000006616	ENSGALG00000004161	CCNB2	214.861	170.051	375.926	193.734	194.131	218.791	206.413	180.373	250.644	233.555	215.572	283.954
6216	5917	1575	ENSGALT00000008321	ENSGALG00000005180	COL11A1	37.9851	37.5718	51.8576	63.9476	40.7267	61.6586	14.871	8.12303	63.7139	19.6937	12.52	52.5312
10540	10241	1560	ENSGALT00000003688	ENSGALG00000002338	ASPM	36.9906	26.663	56.6119	36.5955	24.9151	28.5234	13.4349	10.3044	36.3789	23.27	16.1849	31.5369
2851	2552	1553	ENSGALT00000003047	ENSGALG00000001965	AARS	137.203	106.462	162.416	146.196	128.866	104.834	86.596	66.4625	140.655	88.3283	95.0216	120.112
2742	2443	1548	ENSGALT00000019494	ENSGALG00000011950	ACO2	140.049	142.88	205.083	152.227	134.809	145.773	104.649	91.9439	149.577	114.815	95.7707	153.688
3827	3528	1547	ENSGALT00000011784	ENSGALG00000007273	HSPA4	102.158	80.428	151.921	105.343	96.8324	80.4687	59.798	47.9247	94.2769	77.5648	69.7919	95.0938
1971	1672	1541	ENSGALT00000026525	ENSGALG00000016442	RRM2	250.421	177.6	396.327	221.417	198.528	198.466	185.118	136.961	233.901	236.215	185.515	290.785
3504	3205	1534.75	ENSGALT00000002382	ENSGALG00000001567	NT5DC2	145.307	140.177	184.297	115.042	110.17	92.018	92.7049	86.5698	114.574	88.0987	91.7506	130.793
1944	1645	1533	ENSGALT00000000640	ENSGALG00000000470	LMNB2	171.741	83.9638	252.388	223.883	114.322	177.358	40.0693	3.70097	210.289	80.2243	73.5447	142.551
3976	3677	1531	ENSGALT00000012969	ENSGALG00000007989	ADNP	94.4994	74.7554	155.931	100.029	85.5195	84.8728	24.6265	13.7687	104.339	41.5186	23.4808	88.4714
5813	5514	1530	ENSGALT00000010981	ENSGALG00000006790	KIF11	64.0812	43.2478	125.827	66.6607	47.6452	55.0305	21.1418	11.9903	78.1703	37.156	29.8664	68.1837
2076	1777	1528.85	ENSGALT00000000305	ENSGALG00000000227	CRMP2A	153.56	102.51	163.262	206.692	176.157	155.266	71.6337	44.1803	149.43	102.723	93.2754	124.978
2391	2092	1528	ENSGALT00000026684	ENSGALG00000016536	HADHA	168.775	177.73	253.639	175.472	139.02	160.516	105.433	64.7899	198.612	94.2816	97.0632	182.618
2240	1941	1526.68	ENSGALT00000043690	ENSGALG00000026881	PITX2	273.166	370.099	322.32	188.959	281.385	148.706	163.804	131.241	194.973	123.186	103.791	202.721
1775	1476	1517	ENSGALT00000017574	ENSGALG00000010809	BZW2	256.653	198.872	419.878	246.913	218.968	245.258	172.27	140.168	271.891	274.377	229.648	310.247
2171	1872	1511	ENSGALT00000003016	ENSGALG00000001949	MDH2	210.342	181.842	326.158	193.912	206.849	257.344	211.206	175.561	297.827	226.285	232.314	266.61
4116	3817	1507	ENSGALT00000025259	ENSGALG00000015664	ADD1	106.654	79.4653	192.56	94.8498	90.2436	110.201	51.0511	26.6672	133.426	66.0201	51.1035	108.869
3011	2712	1506	ENSGALT00000038256	ENSGALG00000011504	TMPO	139.142	111.424	321.814	133.408	129.888	177.688	88.8414	52.9318	212.126	157.664	123.217	220.502
2250	1951	1505	ENSGALT00000045430	ENSGALG00000027068		144.19	107.767	202.336	185.321	154.153	180.211	93.3179	65.2021	182.697	118.475	116.917	158.28
1738	1439	1498	ENSGALT00000010461	ENSGALG00000006474	SKP1	274.283	250.475	472.647	250.09	266.464	224.597	219.317	189.124	260.509	342.055	255.923	356.063
5423	5124	1496.88	ENSGALT00000014035	ENSGALG00000008614	TTL	69.0997	49.9757	114.978	70.1817	66.6595	60.1824	44.6626	31.7968	75.7861	43.6883	33.8929	69.1321
6194	5895	1496.46	ENSGALT00000040522	ENSGALG00000007839	NCAM1	74.7675	109.113	170.102	60.9855	65.2847	79.2292	49.4111	42.8086	104.205	78.4375	56.5696	106.128
2140	1841	1488	ENSGALT00000016799	ENSGALG00000010318	TMED10	205.262	228.658	315.011	194.176	189.671	162.399	144.951	86.4449	211.801	149.679	147.641	233.691
1362	1063	1484	ENSGALT00000005281	ENSGALG00000003337	EIF3I	339.806	299.47	607.757	335.387	361.828	415.225	367.53	319.522	419.737	365.105	388.562	515.324
2975	2676	1474	ENSGALT00000012419	ENSGALG00000007664	PSMD1	121.574	93.7054	6.66126	132.33	105.679	115.324	74.8112	60.3095	138.717	83.5215	92.8093	140.944
3258	2959	1472	ENSGALT00000016892	ENSGALG00000010368	VASH1	114.635	72.2857	154.698	119.511	91.2604	96.0142	24.5105	7.7246	105.721	35.2382	26.2966	98.0132
1103	804	1472	ENSGALT00000010913	ENSGALG00000006753	ATP5C1	467.188	395.375	624.879	439.843	382.592	413.258	441.087	419.397	390.89	569.443	631.725	528.105
4400	4101	1467	ENSGALT00000004344	ENSGALG00000002750	NCKAP1	91.7222	73.1299	172.008	85.9381	73.3364	79.2233	50.2985	33.0506	103.692	66.7661	44.5755	102.409
2695	2396	1464.6	ENSGALT00000010129	ENSGALG00000006267	TPX2	111.988	44.8884	163.557	146.851	67.4357	120.232	7.6111	1.08634	127.854	35.0454	11.5729	107.016
3188	2889	1462	ENSGALT00000019909	ENSGALG00000012193	FKBP9	140.498	154.69	229.253	121.575	115.061	118.44	91.7419	58.414	173.479	96.1536	73.0532	147.802
1726	1427	1461	ENSGALT00000026527	ENSGALG00000016444	ODC1	294.163	236.476	490.932	245.964	238.573	250.901	191.788	114.668	282.377	248.77	202.053	350.593
3048	2749	1459	ENSGALT00000023441	ENSGALG00000014525	USP5	112.232	89.9755	166.642	127.505	94.3645	104.534	82.7958	58.9411	134.893	75.1074	62.8148	116.221
2303	2004	1459	ENSGALT00000000212	ENSGALG00000000156	BRD2	157.283	136.709	200.871	174.905	176.248	159.968	101.069	80.6396	152.153	91.5902	94.9428	142.449
2974	2675	1455	ENSGALT00000012454	ENSGALG00000007683		118.428	98.7592	179.468	130.673	119.055	130.298	71.1311	47.8344	137.65	81.1723	68.3379	127.356
357	58	1447	ENSGALT00000045442	ENSGALG00000029140	CRABP2	4841.05	3915.36	4460.86	5993.58	5694.56	5176.75	3335.78	2977.76	3766.53	4836.1	4814.98	4738.68
887	588	1446	ENSGALT00000004733	ENSGALG00000002990	PRELID1	546.48	462.832	520.073	590.794	476.93	565.91	580.808	454.846	477.374	813.28	695.2	404.503
16381	16082	1445.75	ENSGALT00000005857	ENSGALG00000003693		16.8696	13.134	21.1591	21.5972	17.3705	15.5217	5.45074	2.81844	19.7315	4.0396	3.3344	13.1568
2244	1945	1438	ENSGALT00000005335	ENSGALG00000003375	FOXP4	152.041	96.166	237.929	177.617	149.527	169.371	42.8821	18.9455	181.128	41.0867	28.4974	149.566
3150	2851	1431	ENSGALT00000009563	ENSGALG00000005945	CANX	127.914	148.292	169.36	120.583	106.567	83.7548	57.163	35.1034	114.024	77.8923	57.0157	89.4151
2159	1860	1427	ENSGALT00000007484	ENSGALG00000004698	PDAP1	152.535	115.486	251.965	184.313	171.348	185.068	137.679	124.553	203.152	152.429	148.139	202.676
4373	4074	1424.43	ENSGALT00000005114	ENSGALG00000003231	KIF20A	82.0371	62.8139	131.234	83.9975	63.2681	70.3371	46.1534	32.4231	86.3144	52.1112	49.1993	82.908
2511	2212	1421	ENSGALT00000039775	ENSGALG00000002937	PSME3	162.694	134.553	287.761	154.331	154.869	181.453	130.573	89.957	205.242	117.162	98.7848	195.325
7506	7207	1420	ENSGALT00000012737	ENSGALG00000007843	ATRX	37.5158	25.1636	55.5426	47.3347	30.6505	28.4062	13.0232	9.39597	36.6314	27.4779	85.2641	27.1933
4145	3846	1418	ENSGALT00000001197	ENSGALG00000000823	BAZ1B	79.3527	63.4242	125.455	88.5752	74.6359	81.8983	47.7266	33.9367	93.0049	48.883	40.8794	75.3756
4153	3854	1417	ENSGALT00000015909	ENSGALG00000009782	NAA15	89.5018	58.5692	166.283	88.3291	77.6687	72.3207	48.1256	36.0002	96.7677	75.5474	71.2175	91.021
2764	2465	1416.47	ENSGALT00000020174	ENSGALG00000012348	MCM6	118.1	77.9827	176.8	138.05	88.151	142.222	47.3984	23.6749	141.943	99.1665	72.564	126.282
1182	883	1411.74	ENSGALT00000004876	ENSGALG00000003085	CDK1	456.113	393.091	1002.19	384.095	401.708	588.52	461.071	434.614	531.573	572.873	535.974	761.647
3599	3300	1409	ENSGALT00000011145	ENSGALG00000006880	SLC38A10	75.3842	65.2988	119.361	102.575	61.3547	86.0498	24.2402	7.28242	105.03	23.6374	15.0197	77.0384
5413	5114	1408	ENSGALT00000040022	ENSGALG00000012027	SPON1	48.7488	41.914	93.5706	66.1435	36.8658	76.8929	33.0148	19.9457	116.889	44.5447	32.0983	71.6124
3663	3364	1407	ENSGALT00000025968	ENSGALG00000016119	RAD21	99.882	82.8609	209.898	100.481	90.5972	104.411	51.331	31.7823	142.358	96.5365	76.3629	135.523
12419	12120	1406	ENSGALT00000005688	ENSGALG00000003596	TRRAP	26.4024	17.6855	38.7393	27.8694	17.0369	21.6065	8.02566	5.01437	24.5848	9.60135	7.7393	21.6959
522	223	1406	ENSGALT00000029077	ENSGALG00000018357	ND6	2127.62	5261.11	346.127	1514.7	2244.95	3114.23	2642.98	1904.84	3514.39	1268.53	1543.9	3487.59
1149	850	1404	ENSGALT00000043924	ENSGALG00000026880	CS	414.757	284.834	119.108	396.82	423.591	345.323	283.08	205.827	327.506	189.905	156.752	329.371
557	258	1403	ENSGALT00000028065	ENSGALG00000017380	UQCRH	1206.69	1161.54	888.794	1306.42	1408.37	1582.34	1802	1788.01	1214.76	1577.1	1363.38	1569.98
4314	4015	1403	ENSGALT00000027066	ENSGALG00000016764	EIF5B	73.3548	52.4801	110.735	83.9494	70.0233	66.7398	51.0837	42.6171	82.1206	71.8439	152.52	67.8398
9339	9040	1402	ENSGALT00000025850	ENSGALG00000016045	UBR5	36.9767	25.3724	62.276	37.2585	29.3751	35.4854	11.9163	7.93977	44.8411	18.2259	12.8523	36.874
1850	1551	1400	ENSGALT00000039650	ENSGALG00000004043	NBL1	266.173	248.966	551.772	216.851	197.565	275.814	249.829	202.462	375.02	150.261	133.325	295.775
1565	1266	1395	ENSGALT00000014390	ENSGALG00000008858	MDH1	282.474	238.51	474.625	264.72	277.684	315.922	235.302	210.496	338.561	367.798	330.887	360.96
1472	1173	1390	ENSGALT00000025930	ENSGALG00000016093	EIF3E	350.242	295.247	667.024	284.683	328.501	348.214	304.695	294.384	382.103	485.172	413.461	476.973
4263	3964	1387.09	ENSGALT00000007472	ENSGALG00000004690	MAPK6	98.9401	85.4639	223.468	84.0651	83.9083	86.9503	69.8758	39.0968	103.923	98.167	82.4173	115.284
3465	3166	1386	ENSGALT00000007499	ENSGALG00000004707	CSE1L	118.052	84.2337	209.524	105.171	98.2779	93.9415	62.3569	46.1849	124.684	101.015	72.8901	128.798
11684	11385	1383.28	ENSGALT00000008839	ENSGALG00000005508	SETD2	25.4033	17.3851	40.2064	29.1892	24.1504	27.3957	9.53124	5.72798	32.3471	10.6454	8.03092	26.5682
1718	1419	1372.94	ENSGALT00000025447	ENSGALG00000015780	PNRC1	186.304	179.92	341.37	232.442	266.718	252.061	307.642	244.328	263.365	330.263	685.065	226.171
5425	5126	1372.73	ENSGALT00000038732	ENSGALG00000009495	FGFR2	91.3934	98.4964	102.428	64.3358	76.0614	52.2166	37.5816	28.9122	60.3852	25.8739	32.0205	52.6885
3683	3384	1371.25	ENSGALT00000005135	ENSGALG00000003248	SUB1	102.906	83.9667	7.4855	97.3492	99.9641	96.2447	71.0918	51.6931	131.866	109.944	102.919	126.336
3839	3540	1367	ENSGALT00000006374	ENSGALG00000004001	LARP1	76.1138	52.7084	128.575	92.7707	62.2672	87.4573	22.9282	9.74555	108.595	18.2575	26.3467	81.6589
5466	5167	1363	ENSGALT00000004020	ENSGALG00000002546	COL5A1	44.3765	46.5926	52.9205	63.3728	50.7077	39.9365	9.61914	7.87578	41.047	9.24273	11.2429	32.6667
8018	7719	1360.86	ENSGALT00000013447	ENSGALG00000008266	COL4A6	38.5602	37.8333	66.4098	42.3544	24.5808	38.4457	24.8895	15.6362	69.1221	15.4607	10.2363	41.0053
225	225	1359	ENSGALT00000000644	ENSGALG00000000474	RPL36	1340.99	1314.71	903.006	1451.05	1316.73	877.15	1260.45	1261.77	598.681	2613.56	3129.04	845.174
5575	5276	1357	ENSGALT00000034518	ENSGALG00000003970	TJP1	56.3282	38.7725	91.8456	61.7903	38.734	56.3318	21.0039	9.98043	76.3013	29.5088	18.9909	55.8808
2023	1724	1350	ENSGALT00000015144	ENSGALG00000009305	LBR	172.15	173.299	391.902	188.123	114.427	200.078	53.514	26.3305	260.652	95.8468	92.7418	258.648
5268	4969	1349	ENSGALT00000013979	ENSGALG00000008585	SMC3	63.1906	44.0988	117.477	65.2211	54.1071	61.8786	26.7876	20.1194	79.7726	47.7988	41.9372	71.9712
861	562	1343	ENSGALT00000023492	ENSGALG00000014567	PHB2	496.999	423.106	706.419	574.097	472.51	497.21	454.525	358.247	563.673	461.709	511.145	554.311
4483	4184	1338.72	ENSGALT00000044335	ENSGALG00000027156	PSMA7	79.8472	71.1029	113.059	76.8676	80.5663	75.4374	74.1817	75.2162	78.7836	102.948	107.023	94.7215
628	329	1338	ENSGALT00000010228	ENSGALG00000006326	MIF	1440.5	1307.87	1031.02	977.025	858.848	609.13	1469.85	1782.31	794.228	1071.27	1072.39	693.339
826	527	1334	ENSGALT00000043160	ENSGALG00000027151	FKBP12	676.049	606.214	592.093	608.122	663.038	709.081	681.43	431.694	629.122	779.641	712.968	630.365
2051	1752	1331	ENSGALT00000018392	ENSGALG00000011271	LUM	364.988	446.78	278.067	182.511	229.917	124.895	157.124	114.612	137.193	138.565	107.078	185.065
5444	5145	1330.89	ENSGALT00000035062	ENSGALG00000002606	calsyntenin-1	110.811	123.042	241.843	62.1444	60.9296	63.1993	70.3241	39.986	118.263	89.54	69.723	93.5737
1074	775	1326.84	ENSGALT00000040693	ENSGALG00000013537	TPM3	336.738	245.688	406.616	411.304	362.201	374.526	154.699	118.077	375.473	224.746	183.356	357.416
993	694	1326	ENSGALT00000012943	ENSGALG00000007971	SUMO2	471.469	373.779	745.619	459.018	486.808	437.741	392.97	323.351	412.525	438.806	448.482	576.455
2121	1822	1324	ENSGALT00000001317	ENSGALG00000000895	NUDC	158.864	123.514	230.814	174.576	148.47	156.592	123.633	105.695	190.972	122.932	129.583	163.724
2119	1820	1322	ENSGALT00000034897	ENSGALG00000004796	CDC42	229.69	201.291	311.134	174.504	200.168	196.1	185.653	156.575	221.243	204.499	149.931	237.152
2956	2657	1320	ENSGALT00000006228	ENSGALG00000003912	CAP1	126.66	113.131	201.071	119.351	120.928	120.52	98.1468	74.0466	139.019	75.1917	66.5944	128.671
7638	7339	1318.22	ENSGALT00000019136	ENSGALG00000011708	MYLK	27.9568	29.1417	34.8607	43.1515	39.1161	26.3946	8.38547	7.21858	14.3426	13.9404	15.1775	21.9893
8121	7822	1315	ENSGALT00000004623	ENSGALG00000002929	TRIP12	38.8805	28.6833	1.59301	40.3881	30.0227	34.6375	16.5126	10.2685	44.6317	21.1454	15.5349	37.595
4201	3902	1315	ENSGALT00000009328	ENSGALG00000005809	37500	86.76	70.2699	7.05204	80.9625	79.9222	90.287	52.1804	30.0006	97.5803	57.2792	49.7171	110.549
3489	3190	1313	ENSGALT00000012619	ENSGALG00000007778	PES1	75.2657	55.4242	106.388	98.8825	77.6901	88.3732	62.2221	47.0762	80.9143	56.0411	46.2786	84.5321
3333	3034	1307	ENSGALT00000014784	ENSGALG00000009086	EHD3	109.427	105.823	160.001	103.492	102.242	109.559	76.1081	60.41	116.115	97.4347	78.3449	107.284
4204	3905	1306	ENSGALT00000023514	ENSGALG00000014582	CADM1	87.5473	101.736	159.635	80.3466	78.5903	86.6452	42.1438	29.622	109.613	51.5688	44.3561	95.9377
2461	2162	1304	ENSGALT00000015996	ENSGALG00000009839	PPIG	115.619	73.0421	211.646	144.9	116.051	123.712	62.9976	53.7996	164.019	129.959	207.562	129.201
448	149	1303	ENSGALT00000016279	ENSGALG00000010023	CALM	1823.56	1379.02	4038.53	2100.89	1809.17	2177.65	960.627	719.705	2625.37	2565.21	2253.44	3096.66
3000	2701	1300.83	ENSGALT00000017200	ENSGALG00000010570	BTF3L4	135.607	113.474	8.18338	115.702	124.85	134.855	122.924	98.2043	157.812	142.777	138.839	186.854
6045	5746	1300	ENSGALT00000019063	ENSGALG00000011662	NUP205	54.135	36.5911	85.0859	54.353	41.8976	51.8473	29.9589	17.6404	56.8609	31.4724	29.6808	43.5728
1978	1679	1299	ENSGALT00000017877	ENSGALG00000010973	TRA2A	201.948	177.944	315.616	185.868	200.936	191.944	145.661	115.206	223.156	196.168	136.175	223.206
3491	3192	1296	ENSGALT00000012177	ENSGALG00000007528	TCERG1	83.2836	56.3875	150.075	97.5411	71.2762	101.607	32.6119	22.118	112.725	50.4702	46.9175	98.4666
6203	5904	1295.87	ENSGALT00000017192	ENSGALG00000010565	NRD1	49.4517	39.1168	3.66632	52.7304	45.6465	50.3035	38.0667	28.9257	63.7421	44.0664	41.0657	61.426
2710	2411	1295.28	ENSGALT00000013195	ENSGALG00000008130	RTN4	102.585	134.777	158.346	129.066	108.601	94.6626	110.218	87.9792	92.9734	120.742	214.297	101.924
1757	1458	1288	ENSGALT00000006532	ENSGALG00000004107	ITM2A	242.897	319.938	355.029	212.229	225.398	191.752	202.853	169.444	265.122	210.944	187.522	267.493
3090	2791	1288	ENSGALT00000008592	ENSGALG00000005357	COPB2	118.094	103.949	4.71258	110.867	103.018	123.462	82.3142	73.3617	123.044	124.854	121.639	120.34
1303	1004	1287	ENSGALT00000010555	ENSGALG00000006531	TRA2B	333.734	292.138	17.4098	307.957	325.909	382.988	358.958	257.66	435.945	313.307	280.28	486.587
758	459	1284.35	ENSGALT00000011588	ENSGALG00000007153		729.558	728.255	973.12	672.225	680.536	665.878	876.555	882.919	728.321	947.51	1001.45	735.037
7049	6750	1284	ENSGALT00000037786	ENSGALG00000012484	RIF1	42.5457	25.5526	79.6091	45.699	29.3656	43.3592	12.467	5.44329	61.026	17.5463	11.8435	43.0598
2177	1878	1283	ENSGALT00000002207	ENSGALG00000001452	ATP5F1	158.602	149.516	200.709	164.126	128.317	139.856	154.647	132.174	139.189	218.527	219.937	166.89
713	414	1279.79	ENSGALT00000031956	ENSGALG00000020078	H3F3C	795.151	760.655	1207.65	742.648	823.962	692.394	756.591	682.39	641.815	839.131	823.736	864.44
2782	2483	1279.76	ENSGALT00000040376	ENSGALG00000001334	GNB1	157.846	119.915	219.811	123.822	119.412	137.75	104.036	72.7259	136.719	90.3718	85.1813	164.673
5846	5547	1279	ENSGALT00000016337	ENSGALG00000010053	PTPRF	33.7617	26.664	39.2177	55.3934	30.1122	30.7537	8.74867	2.59946	30.9638	8.92524	5.57264	24.9565
959	660	1278	ENSGALT00000003289	ENSGALG00000002107	RANBP1	402.386	274.779	755.448	465.192	391.253	525.955	203.941	161.022	605.416	439.221	317.351	543.677
6242	5943	1278	ENSGALT00000001983	ENSGALG00000001301	CLTCL1	48.7494	31.9323	75.4222	51.6619	38.6801	44.8501	24.228	16.2469	50.2026	29.1166	25.1098	44.927
3249	2950	1277	ENSGALT00000033730	ENSGALG00000004302	NDUFA10	101.691	84.3077	160.978	103.995	98.5063	87.7614	86.2655	75.5989	106.73	117.154	114.179	131.347
2316	2017	1275	ENSGALT00000009135	ENSGALG00000005694	GARS	156.997	134.587	195.286	151.862	132.71	128.252	118.555	104.32	138.974	133.54	121.547	144.635
2295	1996	1273	ENSGALT00000011725	ENSGALG00000007246	ELMO2	147.555	103.399	163.006	153.219	142.037	102.922	120.764	89.8992	119.503	130	131.904	103.891
820	521	1272.53	ENSGALT00000039052	ENSGALG00000005525	SRSF1	663.2	518.647	1057.31	586.781	583.45	522.338	243.556	135.1	648.704	345.051	310.223	699.286
15249	14950	1272	ENSGALT00000027018	ENSGALG00000016739	HERC2	17.4162	12.6026	30.3295	20.4405	13.9066	17.0475	5.76446	3.2507	21.0476	8.71023	5.73953	18.731
6063	5764	1269	ENSGALT00000021808	ENSGALG00000013366	TBL1X	53.48	43.188	80.3766	52.8912	47.5871	42.9381	31.8083	21.6249	55.2102	35.1854	34.5811	47.0793
5630	5331	1268	ENSGALT00000010998	ENSGALG00000006799	AP2A2	61.7521	50.4093	101.286	57.1421	49.7682	60.5991	34.892	24.1828	68.9256	48.3156	40.4891	66.0283
3437	3138	1266	ENSGALT00000026115	ENSGALG00000016198	U2AF1	110.816	90.2788	246.414	96.9229	101.79	120.664	93.6391	76.1072	137.451	134.485	123.983	175.332
8584	8285	1265	ENSGALT00000011789	ENSGALG00000007276	GCN1	39.815	25.7895	59.5329	36.6812	27.689	32.018	18.7438	10.9709	41.0776	18.9645	16.4679	32.6316
2250	1951	1264	ENSGALT00000006773	ENSGALG00000004259	BLMH	151.847	125.028	245.535	155.645	142.528	142.753	89.7645	63.6692	183.142	132.836	98.6146	173.741
3403	3104	1259	ENSGALT00000009497	ENSGALG00000005904	TMED5	102.877	113.553	201.498	97.4427	108.157	106.655	76.1785	54.712	125.278	99.6993	79.6687	136.953
1392	1093	1259	ENSGALT00000011732	ENSGALG00000007250	SNRB'	275.562	239.829	506.206	276.727	291.374	348.304	314.603	278.309	355.247	421.207	354.491	433.31
3109	2810	1258	ENSGALT00000012021	ENSGALG00000007430	ARCN1	108.276	93.1238	168.444	107.552	106.273	94.6287	71.4335	55.1909	123.62	75.1765	71.5034	113.225
899	600	1257.9	ENSGALT00000001657	ENSGALG00000001103	PSMB7	505.859	430.387	555.834	503.664	433.359	469.222	450.397	432.066	447.957	721.664	730.913	465.631
2258	1959	1256	ENSGALT00000007277	ENSGALG00000004571	PPP1CC	163.96	132.764	306.549	154.028	142.911	170.004	132.736	96.6677	194.807	145.457	123.241	212.835
3461	3162	1256	ENSGALT00000006533	ENSGALG00000004108	CCAR1	87.7017	62.3917	148.598	95.4274	76.1366	87.6329	52.249	38.5079	97.1026	67.2608	153.718	78.6806
5110	4811	1255.94	ENSGALT00000011568	ENSGALG00000007143	RNF10	61.7799	53.662	100.703	62.7161	63.6988	55.3194	41.6711	27.3243	62.4254	41.6932	41.9398	54.8612
5264	4965	1254	ENSGALT00000023319	ENSGALG00000014439	NCAPD2	57.3311	42.3928	109.764	60.6769	46.6324	60.9871	37.9153	29.8376	77.1744	38.956	35.4231	65.3804
1657	1358	1254	ENSGALT00000009021	ENSGALG00000005622	ARF4	267.266	232.07	425.777	221.842	267.744	288.314	227.922	170.123	263.258	229.408	231.157	312.198
2871	2572	1250.63	ENSGALT00000042945	ENSGALG00000003681	TOP1	99.7977	55.8143	140.815	116.817	83.6211	104.91	3.90695	6.07483	119.53	42.4748	74.4076	101.858
1201	902	1244	ENSGALT00000034416	ENSGALG00000021340	CA9	325.188	357.212	44.3211	331.329	248.042	314.031	281.541	264.062	383.081	201.724	196.757	237.608
2848	2549	1242	ENSGALT00000040669	ENSGALG00000000468	RCC2	108.165	87.8405	137.487	117.057	115.486	110.954	82.1771	55.1821	109.428	70.0713	65.0151	99.6587
2155	1856	1240	ENSGALT00000021058	ENSGALG00000017153	RDX	133.028	71.4759	244.489	160.505	122.074	172.113	37.123	13.2936	223.762	104.64	82.9872	155.001
1384	1085	1240	ENSGALT00000007391	ENSGALG00000004639	GNAI2	222.394	217.48	289.821	274.56	226.456	245.728	189.328	159.573	260.751	132.781	133.116	240.664
9255	8956	1237	ENSGALT00000024915	ENSGALG00000015451	ZNF462	30.9192	21.0625	1.15942	33.1819	26.5114	20.3681	9.682	5.74831	26.6981	10.5937	14.5795	18.9806
1633	1334	1236	ENSGALT00000020881	ENSGALG00000012798	SSR1	257.776	280.424	461.848	222.591	224.92	223.961	199.642	151.886	268.139	233.535	250.497	343.651
3826	3527	1235	ENSGALT00000015334	ENSGALG00000009415	SMOC1	1.66403	2.0645	5.00495	84.1215	55.3963	81.9973	6.53186	3.87625	31.626	32.452	18.7373	65.679
5991	5692	1234.95	ENSGALT00000017012	ENSGALG00000010448	LTBP1	45.4376	55.9249	92.2389	52.123	41.5065	46.5022	23.4408	15.1994	51.9341	28.5827	25.0935	55.5843
5726	5427	1234	ENSGALT00000005099	ENSGALG00000003220	UPF1	57.4891	42.0543	92.0326	54.6262	45.9711	53.1725	25.0772	16.0007	67.653	33.469	28.6757	58.6376
2887	2588	1232	ENSGALT00000018694	ENSGALG00000011465	STT3B	120.245	126.962	179.75	114.365	91.6538	93.4975	66.5163	41.766	110.66	82.1173	64.6632	108.398
1452	1153	1232	ENSGALT00000013403	ENSGALG00000008236	PSMC2	243.29	195.575	356.934	256.701	195.274	319.001	242.175	171.746	262.194	214.969	240.362	268.594
2152	1853	1226.83	ENSGALT00000038503	ENSGALG00000008108	PSMC3	154.233	123.105	196.192	159.057	144.162	143.278	131.869	129.896	162.857	146.234	166.126	168.092
8141	7842	1225.12	ENSGALT00000017416	ENSGALG00000010706	TENM3	18.6156	10.0151	29.2999	37.5316	14.3972	33.932	1.35991	0.481568	35.2582	3.44404	1.39735	29.8713
2836	2537	1225	ENSGALT00000019595	ENSGALG00000012007	ST13	135.07	112.383	213.515	116.001	113.518	109.78	99.0895	66.6029	141.867	110.749	112.389	118.903
9317	9018	1225	ENSGALT00000026178	ENSGALG00000016236		33.3986	25.3838	56.5747	32.6341	28.556	26.6358	15.7182	10.4937	36.7651	21.5891	18.2025	29.5796
849	550	1221.2	ENSGALT00000044272	ENSGALG00000000533	SRSF3	492.025	417.351	940.541	533.421	502.376	663.324	566.855	438.582	837.231	672.401	610.719	729.796
5948	5649	1221	ENSGALT00000015209	ENSGALG00000009339	TP53BP2	43.2556	34.1581	71.7497	51.9266	39.6477	46.4948	22.6932	14.5399	52.6752	26.402	23.3976	50.7223
4802	4503	1221	ENSGALT00000023259	ENSGALG00000014395	DHX15	65.4644	51.5933	112.57	65.1417	54.0401	50.7162	41.6158	26.2812	62.5496	44.8618	40.1226	72.0321
2430	2131	1218	ENSGALT00000018417	ENSGALG00000011288	DACT2	72.2333	57.6607	74.8777	137.312	122.063	96.4679	25.8259	17.9936	57.7323	34.6619	30.5118	76.3872
3361	3062	1217	ENSGALT00000002230	ENSGALG00000001472	JAM3	67.2165	81.2983	138.869	95.484	83.7154	105.62	52.0744	34.1844	93.8767	60.6193	57.6122	113.573
3147	2848	1217	ENSGALT00000017979	ENSGALG00000011038	CBX3	115.262	98.1932	291.072	102.659	110.993	138.445	96.1709	66.6805	139.555	143.819	118.643	199.47
2151	1852	1216	ENSGALT00000041172	ENSGALG00000001101	MBD3	186.973	151.001	309.309	157.739	151.678	166.864	86.4427	55.0769	209.501	88.8786	72.5189	180.502
5393	5094	1215	ENSGALT00000042769	ENSGALG00000029167	THOP1	53.9939	37.3436	66.1813	57.3011	41.2774	48.3493	34.7566	27.153	52.1104	32.8131	31.3873	46.58
2015	1716	1215	ENSGALT00000013776	ENSGALG00000008454	NOP58	158.728	121.066	278.858	170.1	139.605	135.851	121.574	99.2774	189.892	156.686	180.447	182.425
3309	3010	1213.53	ENSGALT00000024967	ENSGALG00000015480	POGLUT1	92.4982	108.739	158.252	96.8569	81.8392	84.7518	56.4133	42.9111	118.721	56.8943	46.571	104.455
4714	4415	1213	ENSGALT00000012363	ENSGALG00000007642		78.3708	66.1765	133.825	66.0048	65.0704	58.8967	47.5668	31.7886	80.6251	55.3832	50.4588	78.1375
4998	4699	1211	ENSGALT00000016394	ENSGALG00000010084	EIF4G3	52.2025	39.8532	71.2657	61.9133	47.6633	47.4254	15.7069	8.66017	54.6632	21.3429	24.9522	40.1326
21073	20774	1210	ENSGALT00000019277	ENSGALG00000011811	SYNE2	13.7664	9.55137	18.0694	13.993	8.65457	9.32302	3.19344	1.39334	11.3242	4.98093	2.95032	9.3153
7938	7639	1207	ENSGALT00000020766	ENSGALG00000012720	NUP153	36.9308	28.7449	61.2597	37.9591	27.9584	29.6828	16.2519	10.4166	39.0441	16.3171	10.4652	39.4477
6790	6491	1207	ENSGALT00000018644	ENSGALG00000011432	CDC42BPB	44.5721	34.9855	82.359	44.6726	34.2499	36.5034	19.4056	11.9792	52.9213	25.4322	22.5794	44.5246
6174	5875	1206	ENSGALT00000011493	ENSGALG00000007098	KIF21A	32.3536	22.2705	57.0593	49.3157	31.5275	40.355	14.2875	9.45372	44.3782	24.8473	26.9426	40.8722
5347	5048	1199	ENSGALT00000020337	ENSGALG00000012438	SBF1	49.0691	31.6437	73.3668	57.0618	45.2104	53.5735	13.2053	5.92442	58.9696	12.1411	7.17928	48.4201
1421	1122	1199	ENSGALT00000012934	ENSGALG00000007965	HN1	263.209	233.63	415.383	256.727	258.364	276.566	219.397	217.711	275.631	299.085	285.953	311.186
1351	1052	1198	ENSGALT00000019828	ENSGALG00000012138	39326	280.596	212.405	479.708	273.581	251.751	273.967	113.45	85.7923	314.884	203.528	165.156	314.159
1020	721	1197.77	ENSGALT00000022437	ENSGALG00000013819	SRSF7	439.817	390.342	489.271	399.102	423.476	343.994	552.952	503.069	303.684	318.624	308.314	380.996
5021	4722	1194	ENSGALT00000022714	ENSGALG00000014022	UBQLN4	56.3267	46.8392	95.2545	60.7469	59.0387	61.876	49.3982	38.0685	73.299	38.3312	36.9074	72.9904
3482	3183	1194	ENSGALT00000021443	ENSGALG00000013135	GALNT1	84.8601	83.3549	158.437	90.1183	85.1349	87.8779	53.5462	33.4554	104.98	102.176	88.5749	110.507
3792	3493	1192	ENSGALT00000021064	ENSGALG00000012915	MCM4	91.1144	67.228	138.976	81.9829	77.1735	70.1045	57.3742	40.577	77.3209	76.5646	67.1345	91.4118
3207	2908	1190	ENSGALT00000025521	ENSGALG00000015830	SYNCRIP	98.2976	77.7788	177.467	98.3101	84.4116	95.1898	51.8247	34.9663	120.018	73.2999	73.8588	114.542
4866	4567	1189	ENSGALT00000013997	ENSGALG00000008595	RTF1	59.8156	42.6991	113.152	62.5455	57.8869	64.3947	38.9074	29.1403	81.0687	58.9427	99.0759	69.998
3429	3130	1189	ENSGALT00000008352	ENSGALG00000005202	DDB1	81.7612	58.6676	103.949	91.2605	71.8577	61.0338	41.3338	25.7638	72.5393	36.8224	26.0519	64.2886
5295	4996	1188	ENSGALT00000000542	ENSGALG00000000397	IPO9	59.6186	46.0922	107.108	57.1267	51.403	66.8453	39.58	29.289	80.5583	39.957	37.3368	74.9241
2954	2655	1188	ENSGALT00000036694	ENSGALG00000016704	CDC5L	97.4156	65.7355	143.6	107.497	82.845	116.263	54.1519	38.3788	122.405	106.727	85.9153	96.3018
1645	1346	1187	ENSGALT00000036142	ENSGALG00000022565	IDH2	178.18	162.46	195.564	211.861	186.582	190.398	165.691	136.407	191.766	155.643	161.154	169.189
12326	12027	1185	ENSGALT00000015176	ENSGALG00000009348	AKAP9	15.9817	12.3167	27.5129	23.6704	17.424	17.1927	5.07256	3.59671	19.544	7.25338	5.89367	16.8841
2530	2231	1184	ENSGALT00000024398	ENSGALG00000015119	SS18	116.587	82.5122	211.229	127.496	116.804	154.547	49.6712	35.5231	185.632	94.3299	74.5326	144.849
975	676	1183.66	ENSGALT00000039589	ENSGALG00000003521	TPM1	432.269	384.122	414.082	420.655	415.884	343.413	169.188	124.144	343.743	295.056	216.678	322.072
1016	717	1183	ENSGALT00000033694	ENSGALG00000020973	SUMO3	430.858	333.226	15.4478	396.379	343.015	336.984	400.447	335.323	338.867	456.258	408.079	414.283
3537	3238	1183	ENSGALT00000014276	ENSGALG00000008779	ACTR2	93.7173	80.6741	163.069	87.7715	77.8518	91.5684	59.0269	38.8246	104.508	71.9258	69.4588	107.165
2169	1870	1178.15	ENSGALT00000006650	ENSGALG00000004184	SPARC	158.014	243.294	178.354	151.358	209.116	146.192	159.805	160.862	142.813	111.575	104.409	133.013
3348	3049	1178	ENSGALT00000001926	ENSGALG00000001263	GTF2IRD1	84.7398	78.3612	142.186	92.8182	87.6367	96.1064	61.8463	41.8618	110.923	53.4116	45.7968	99.7454
6852	6553	1178	ENSGALT00000000486	ENSGALG00000000360		37.1075	29.2723	57.1244	43.1868	31.33	34.764	18.0338	11.3117	37.1362	16.3005	12.6875	32.9858
684	385	1175	ENSGALT00000009231	ENSGALG00000005749	COX4I1	787.506	759.472	844.189	733.2	674.401	563.937	801.727	792.882	547.875	1001.87	1049.3	752.808
2122	1823	1173	ENSGALT00000001489	ENSGALG00000001007	MMP15	124.168	146.538	193.379	154.581	149.036	140.035	136.729	107.688	134.39	94.5713	115.186	147.781
5390	5091	1172	ENSGALT00000001472	ENSGALG00000000996	AP3D1	49.7026	39.8239	72.2032	55.3057	46.4992	42.6887	30.0424	19.0078	52.4822	29.1427	42.2931	42.2473
1865	1566	1169	ENSGALT00000023128	ENSGALG00000014305	ACTN4	144.035	113.628	110.734	179.336	129.442	172.061	52.1706	36.3532	165.503	60.1793	40.1589	122.604
4112	3813	1167	ENSGALT00000012890	ENSGALG00000007934	KCTD2	71.119	55.32	114.74	73.5274	64.4388	75.8284	59.5801	44.7348	88.3943	57.3637	48.9207	77.985
2834	2535	1167	ENSGALT00000009947	ENSGALG00000006160	HNRNPA0	120.075	102.418	218.258	110.596	124.046	97.3798	104.469	71.88	128.656	96.0795	79.6806	131.296
1181	882	1166	ENSGALT00000029277	ENSGALG00000018512	YBX3	261.028	202.263	341.81	317.596	280.184	252.506	216.095	147.74	270.988	237.703	227.201	240.988
4145	3846	1166	ENSGALT00000019105	ENSGALG00000011686	SEMA5B	51.3296	38.0427	71.9972	72.8341	35.8744	60.7056	16.0013	4.94331	86.1807	19.9092	10.8088	64.7862
4436	4137	1161.7	ENSGALT00000008544	ENSGALG00000005326		70.8584	61.8923	83.442	67.4615	69.099	51.1865	59.1071	53.9748	48.2882	63.3688	61.9657	71.853
3102	2803	1161	ENSGALT00000012894	ENSGALG00000007937	SF3A1	95.3176	75.8216	153.429	99.5072	84.9608	92.8945	57.533	42.1062	108.954	66.2774	65.7877	107.394
6671	6372	1161	ENSGALT00000042924	ENSGALG00000001258	NUMA1	33.8074	26.8899	62.4136	43.7726	39.4129	39.321	13.0224	9.75561	49.2153	12.3415	8.28039	39.5799
1682	1383	1160	ENSGALT00000045686	ENSGALG00000026644	DBN1	181.696	174.84	281.025	201.503	193.894	235.857	117.8	76.9209	257.579	108.429	77.8432	222.609
555	256	1159	ENSGALT00000039695	ENSGALG00000007468	HBAA	1774.16	2476.34	2264.7	1087.65	950.557	1334.68	2608.51	3367.82	1979.98	2637.84	1984.01	1078.79
1846	1547	1158	ENSGALT00000010902	ENSGALG00000006743	YWHAH	223.405	190.038	270.838	179.831	184.942	142.04	187.184	134.219	189.492	184.196	189.825	193.973
2268	1969	1153.21	ENSGALT00000021814	ENSGALG00000013370	Sema3F	115.048	112.938	138.144	140.704	109.608	119.771	74.282	50.6402	100.718	47.2547	45.5569	101.503
1153	854	1153	ENSGALT00000034269	ENSGALG00000021262	GHITM	324.722	266.714	360.312	324.352	242.894	284.417	243.163	167.717	328.797	193.303	152.897	299.763
622	323	1152	ENSGALT00000025326	ENSGALG00000015704	TXN	875.072	850.304	20.3604	856.831	854.321	446.808	1024.63	984.096	487.54	1116.8	1240.81	597.946
5723	5424	1148.99	ENSGALT00000038042	ENSGALG00000008082	THOC5	46.7496	38.5956	61.8995	50.8912	42.5555	48.0709	37.3416	29.7938	47.6946	32.3722	27.8073	47.955
1713	1414	1147.71	ENSGALT00000023409	ENSGALG00000014498	NOP56	169.089	155.025	105.081	194.998	202.97	232.443	181.752	173.215	200.377	120.775	137.137	231.433
489	190	1145.45	ENSGALT00000043517	ENSGALG00000026618	RPL34	1905.37	1602.3	2432.11	1448.34	2123.24	4368.98	2871.64	2286.13	4308.56	5067.13	4482.7	2442.9
3600	3301	1145	ENSGALT00000006188	ENSGALG00000003891	ZNF423	81.9883	55.9042	151.201	83.3308	69.7099	78.6656	30.2426	19.6404	91.406	36.6027	29.8688	85.617
5477	5178	1145	ENSGALT00000026464	ENSGALG00000016409	KIDINS220	43.9473	41.4839	83.5904	53.1238	31.6649	42.9835	13.7183	7.03395	52.8863	23.15	14.2039	44.1755
1562	1263	1143	ENSGALT00000009622	ENSGALG00000005983	MMP11	209.111	162.867	336.398	217.414	195.476	231.169	187.979	150.361	230.038	174.316	175.12	272.039
3084	2785	1141	ENSGALT00000037556	ENSGALG00000011103	PAPOLA	99.9089	69.4485	204.072	98.4251	87.461	102.75	40.5564	23.0109	124.002	72.7647	71.1884	126.617
3101	2802	1136	ENSGALT00000032361	ENSGALG00000007128	SH3BGRL	115.25	88.2736	200.672	97.3993	123.692	89.7433	87.0536	59.999	113.47	106.411	101.95	133.207
2364	2065	1136	ENSGALT00000020295	ENSGALG00000012415	PDIA4	148.89	181.045	229.969	132.161	122.761	113.954	93.4861	70.8093	139.622	117.948	104.785	157.198
2336	2037	1135.91	ENSGALT00000016194	ENSGALG00000009961	ABCE1	158.373	114.21	246.671	133.967	122.332	124.87	104.808	66.4025	163.395	145.079	130.877	153.771
2123	1824	1133	ENSGALT00000003587	ENSGALG00000002284	TRAPPC3	140.481	121.508	263.011	149.228	137.168	175.404	115.662	102.476	214.357	141.91	122.136	197.315
1352	1053	1133	ENSGALT00000019994	ENSGALG00000012245	ADH5	263.608	232.084	399.541	258.492	226.159	338.67	241.067	227.717	422.257	304.019	279.384	326.472
11539	11240	1131	ENSGALT00000005804	ENSGALG00000003662	SPEN	18.4535	13.0171	25.1127	24.1736	15.2809	15.6559	8.87225	5.9296	19.4272	6.18917	11.9963	15.315
339	40	1130	ENSGALT00000046202	ENSGALG00000027227	RPL10L	8460.1	7975.49	5183.25	6786.78	8257.11	8079.88	7639.3	7319.07	7198.32	8134.64	7941.05	7892.42
2018	1719	1130	ENSGALT00000002866	ENSGALG00000001850	RARS	137.267	111.854	212.227	157.924	140.049	144.429	111.124	88.9763	155.544	114.369	119.985	163.344
1851	1552	1129	ENSGALT00000007502	ENSGALG00000004709	MSN	106.487	71.6946	164.031	174.762	100.165	147.103	29.2757	5.71207	152.572	46.7725	33.6532	116.661
2788	2489	1128.15	ENSGALT00000000678	ENSGALG00000000495	MCRS1	96.5851	80.3318	62.4079	108.89	109.824	88.9987	108.072	97.0947	108.67	113.174	133.352	101.072
2701	2402	1128	ENSGALT00000017623	ENSGALG00000010842	UBR7	118.061	88.2901	199.938	112.819	103.571	118.043	79.4376	45.0447	130.678	92.32	80.9863	143.647
5089	4790	1128	ENSGALT00000009368	ENSGALG00000005834	PAFAH1B1	62.1547	45.6042	99.9359	56.5743	48.8293	51.9352	34.7581	22.5213	62.3473	39.914	34.4919	64.4287
4596	4297	1127	ENSGALT00000006164	ENSGALG00000003875	ABL	58.2038	44.4289	72.6568	63.0092	56.191	60.6767	29.984	17.1262	60.6978	24.5621	19.7207	46.345
1602	1303	1127	ENSGALT00000042727	ENSGALG00000029008		239.033	207.463	422.63	207.79	158.47	244.126	61.3911	22.952	309.101	82.0998	50.7188	249.079
6152	5853	1121	ENSGALT00000008777	ENSGALG00000005464		39.6767	28.8077	51.8924	46.0121	34.4311	35.776	17.0563	13.1937	38.2474	21.9761	19.4862	27.6063
4744	4445	1120	ENSGALT00000006114	ENSGALG00000003849	TRPM1	43.3622	29.0768	74.0921	60.5329	35.1326	53.0189	8.42217	2.69125	64.5814	11.1022	6.23481	43.6068
1802	1503	1120	ENSGALT00000027231	ENSGALG00000016855	ARGLU1	149.362	134.893	279.227	179.021	148.858	164.196	106.799	68.4344	150.484	106.657	119.144	175.247
3257	2958	1119	ENSGALT00000038316	ENSGALG00000007386	LUC7L3	77.7417	72.6178	136.906	90.8819	76.1159	83.1909	48.2083	40.1526	86.3798	76.6354	100.177	92.1028
2901	2602	1117	ENSGALT00000009029	ENSGALG00000005628	COL9A3	66.4887	100.043	105.221	103.131	105.234	128.674	70.2984	51.4341	130.424	104.373	53.2547	123.151
2407	2108	1115	ENSGALT00000025345	ENSGALG00000015718	CTBP1	123.516	112.909	223.061	127.072	144.353	146.734	70.2276	50.111	158.516	119.62	98.0963	171.541
445	146	1114	ENSGALT00000036310	ENSGALG00000022674	HINTW	2007.6	1579.76	5347.23	1833.07	2062.99	2430.79	1787.03	1027.41	1458.31	1952.23	2326.46	3807.72
1543	1244	1114	ENSGALT00000042863	ENSGALG00000028112	EIF3K	214.985	215.291	116.581	215.135	203.02	209.71	208.255	236.456	203.999	289.717	270.334	198.211
2675	2376	1113.15	ENSGALT00000001185	ENSGALG00000000814	HNRNPR	155.72	122.091	302.266	112.552	150.733	162.606	95.3699	76.7305	169.135	139.227	106.771	199.356
4942	4643	1111.78	ENSGALT00000024670	ENSGALG00000015285	TOMM70A	60.6873	50.4233	118.838	57.5264	50.0198	59.495	42.1245	24.9773	79.0016	48.5846	46.3657	69.1717
2597	2298	1111	ENSGALT00000009099	ENSGALG00000005674	USP10	116.961	85.5526	197.313	116.147	101.061	111.152	68.5983	42.9001	139.616	75.7853	105.988	123.179
11486	11187	1111	ENSGALT00000007955	ENSGALG00000004960	FBN1	36.8673	42.1449	67.2637	23.8586	22.069	20.6106	13.7576	9.78627	28.5155	20.2492	13.1488	26.0266
2090	1791	1110	ENSGALT00000011181	ENSGALG00000006904	RNH1	124.078	107.23	205.048	148.893	149.72	174.841	107.61	79.4953	135.876	123.904	109.21	168.324
7527	7228	1109	ENSGALT00000002623	ENSGALG00000001708	MED1	34.7863	26.4757	62.4206	36.8603	30.6922	37.1411	14.9184	9.25046	44.655	16.8925	13.4198	38.226
5876	5577	1109	ENSGALT00000000115	ENSGALG00000000085	GFPT1	46.4716	39.74	73.7621	47.7723	37.7025	38.829	24.9191	12.8125	45.4173	23.7487	18.7304	42.5799
1679	1380	1105	ENSGALT00000024899	ENSGALG00000015436	SDCBP	235.722	217.675	382.833	192.366	226.025	201.724	198.607	147.206	274.558	212.229	178.938	262.849
3858	3559	1102	ENSGALT00000002811	ENSGALG00000001817	CTCF	69.1861	48.463	105.861	74.3873	64.7892	76.1067	33.3546	18.3967	80.3876	56.9401	40.2824	74.2219
1145	846	1102	ENSGALT00000011710	ENSGALG00000007237	ALYREF	306.665	265.201	490.346	312.937	334.276	312.05	280.132	237.858	325.975	387.251	339.555	393.721
5853	5554	1101	ENSGALT00000002426	ENSGALG00000001600	DVL1	9.12626	7.86619	19.0077	47.6241	30.5421	44.5106	5.16577	3.57696	17.5472	9.2866	7.67672	27.3731
4517	4218	1101	ENSGALT00000021790	ENSGALG00000013354	ABCF2	56.5426	37.5467	96.0916	62.7085	49.9059	58.5416	40.4831	26.8921	71.946	42.7226	38.1585	69.9724
2081	1782	1096	ENSGALT00000009495	ENSGALG00000005902	RAB7A	136.906	121.945	199.673	147.757	132.313	143.973	121.62	106.869	160.008	152.044	142.361	147.135
1180	881	1095	ENSGALT00000007651	ENSGALG00000004794	H2AFY2	256.631	191.645	476.366	298.596	271.117	337.753	177.6	146.453	347.635	214.844	167.57	369.609
3621	3322	1094	ENSGALT00000016099	ENSGALG00000009899	CAND1	84.1602	60.6881	132.272	79.1158	62.8686	70.8354	40.4859	25.1107	93.4133	50.7474	43.3167	80.9067
5648	5349	1093	ENSGALT00000044482	ENSGALG00000025875	Alx-4	54.4005	54.7489	66.197	49.09	46.9065	30.8595	22.4121	13.718	46.7398	10.5651	13.2517	33.9198
17389	17090	1087	ENSGALT00000025373	ENSGALG00000015733	MDN1	14.7124	8.76099	21.0532	15.2803	8.91659	11.1256	4.16892	1.99368	13.7935	5.24425	4.89609	9.86167
2339	2040	1085.19	ENSGALT00000006049	ENSGALG00000003815	RPN2	116.954	166.376	205.843	127.797	121.904	100.178	160.182	123.615	120.384	148.11	163.866	148.449
8816	8517	1085	ENSGALT00000017438	ENSGALG00000010715	CCDC88C	25.5123	16.03	46.6338	30.6047	19.5562	27.3711	11.258	5.44265	37.5682	14.7098	9.69921	25.9066
1383	1084	1084	ENSGALT00000017367	ENSGALG00000010675	PSMC1	236.627	214.112	341.337	240.24	175.448	227.729	177.893	150.951	250.844	234.674	208.954	259.846
4491	4192	1084	ENSGALT00000039625	ENSGALG00000008957	MSH6	63.0981	46.8988	76.2519	62.1231	43.227	47.1305	32.8723	21.9121	53.9086	37.747	36.1068	48.939
3192	2893	1084	ENSGALT00000009679	ENSGALG00000006015	COPB1	100.698	78.0248	148.477	90.0174	87.1359	79.5036	63.854	48.8079	96.7924	74.0102	60.425	97.0577
2190	1891	1083	ENSGALT00000019344	ENSGALG00000011857	LUC7L2	118.857	90.3686	204.729	137.589	112.068	116.276	72.9282	53.941	140.427	104.808	100.898	134.741
3589	3290	1082	ENSGALT00000012780	ENSGALG00000007870	SMAD3	79.1	56.0911	111.15	79.009	67.5014	68.5971	18.9	5.87611	80.8013	16.9352	12.3114	65.1819
5538	5239	1082	ENSGALT00000026666	ENSGALG00000016524	CAD	52.0667	35.2677	84.1037	49.6163	40.4957	45.3215	17.6302	8.78691	56.8566	14.7067	11.0884	45.7012
1957	1658	1081	ENSGALT00000033579	ENSGALG00000008073	NF2	139.26	98.5393	183.606	156.634	143.349	146.924	67.8667	53.0179	170.171	106.767	82.6114	137.809
2877	2578	1080	ENSGALT00000001687	ENSGALG00000001118	NEK6	78.3872	72.5535	125.132	100.644	104.198	101.551	79.5168	59.4119	86.6484	75.1493	63.4669	90.5924
3403	3104	1079.83	ENSGALT00000026909	ENSGALG00000016676	MCM3	94.571	84.4501	148.34	83.5756	98.1097	67.1609	66.7636	44.561	80.5378	58.7489	45.157	91.682
3118	2819	1079	ENSGALT00000040362	ENSGALG00000007910	SMO	82.758	101.302	106.699	91.9542	90.0937	81.3645	75.5943	51.8699	87.2161	52.6306	47.8318	79.8639
7672	7373	1076	ENSGALT00000007656	ENSGALG00000004798		28.7652	22.0355	44.903	35.0601	28.0058	27.5553	14.0319	9.61902	31.3701	14.6819	10.6982	27.0443
1388	1089	1075	ENSGALT00000003180	ENSGALG00000002045	EIF2B	229.784	173.637	417.005	237.152	200.676	228.829	159.349	162.224	293.553	244.268	278.958	303.194
2745	2446	1074.33	ENSGALT00000021807	ENSGALG00000013365		91.8755	66.1452	118.056	105.518	88.773	111.859	45.2258	33.6888	107.729	60.4895	52.7174	81.2345
828	529	1074	ENSGALT00000028069	ENSGALG00000017384	ERH	517.412	462.405	1146.67	487.746	514.044	619.656	546.793	450.051	797.11	827.55	791.878	904.853
5898	5599	1073	ENSGALT00000043008	ENSGALG00000026505	RDH10	36.6643	48.606	69.485	46.0399	38.7359	42.2557	22.421	16.0242	27.936	33.3223	28.6515	43.8358
2043	1744	1072	ENSGALT00000044462	ENSGALG00000026992	SMARCA4	92.0098	54.538	63.311	147.67	89.002	86.6091	20.6097	11.6975	105.621	27.1099	24.4475	71.2181
2002	1703	1068	ENSGALT00000016532	ENSGALG00000010167	PNN	116.704	92.3279	241.15	150.661	126.937	164.498	54.8628	39.5124	183.692	95.4396	116.731	158.937
1650	1351	1066	ENSGALT00000016208	ENSGALG00000009971	CDC20	195.095	153.101	333.189	189.56	179.596	179.42	190.814	168.475	200.627	188.295	209.869	227.638
1262	963	1061	ENSGALT00000004826	ENSGALG00000003053	PRDX6	243.366	230.382	391.414	264.688	274.281	231.12	269.356	279.278	227.754	202.005	228.014	306.877
4909	4610	1059	ENSGALT00000013400	ENSGALG00000008233	BUB1	54.7439	43.6829	98.2069	55.1875	45.5085	47.5422	28.8968	18.0718	61.0559	41.4724	33.1797	53.5281
2161	1862	1056	ENSGALT00000039102	ENSGALG00000010073	DDOST	173.432	228.768	209.777	136.248	118.889	108.883	142.285	124.476	130.643	99.1735	75.8504	164.011
3672	3373	1055	ENSGALT00000024710	ENSGALG00000015308	SEC63	66.5949	69.8896	106.208	75.1418	54.3533	61.9964	36.1742	30.0825	77.2682	60.9295	54.5123	67.834
1872	1573	1055	ENSGALT00000039331	ENSGALG00000023626	NTN1	0	0	0.220042	161.127	116.55	197.316	2.37317	3.53087	22.6355	13.2575	3.38815	68.4268
2445	2146	1052	ENSGALT00000005734	ENSGALG00000024076	FEN1	110.141	91.9303	172.66	117.769	106.128	109.389	73.2085	52.7574	105.125	70.1744	63.8256	124.065
940	641	1050.33	ENSGALT00000030933	ENSGALG00000014854	MYL12A	414.12	373.779	708.825	393.653	407.066	494.492	386.94	387.462	506.119	642.141	472.048	614.082
3454	3155	1050	ENSGALT00000000866	ENSGALG00000000613	RAB11B	98.5926	83.0128	136.476	79.9531	93.4536	84.5728	80.0856	69.468	97.0428	68.0155	65.8805	96.4142
2594	2295	1049	ENSGALT00000025450	ENSGALG00000015783	IMMT	104.618	104.8	160.922	109.809	90.5901	103.521	72.2664	55.1962	124.031	74.289	71.0608	106.172
8230	7931	1048	ENSGALT00000021577	ENSGALG00000013208	CENPE	30.6433	20.1696	52.5671	31.7453	23.5332	24.5987	11.5519	9.61562	25.8781	29.3452	23.5197	25.0219
3061	2762	1047	ENSGALT00000006575	ENSGALG00000004132	UHRF1	83.3068	57.0925	168.99	91.0686	71.1673	90.0943	32.5145	16.8218	111.165	55.0424	42.0653	114.781
2910	2611	1047	ENSGALT00000004113	ENSGALG00000002612	U2SURP	82.3518	61.2658	5.70029	96.3353	77.9071	79.4929	39.4602	27.5715	93.6836	55.421	62.2565	77.0221
2901	2602	1047	ENSGALT00000009434	ENSGALG00000005869	COPG1	94.9912	89.4618	131.028	96.6685	96.8809	84.9115	71.0362	45.7693	102.537	68.5829	65.749	91.3609
724	425	1047	ENSGALT00000044143	ENSGALG00000026289		521.31	502.743	992.365	591.838	916.113	1265.99	579.962	465.938	865.252	630.395	544.242	1402.75
4604	4305	1045	ENSGALT00000035893	ENSGALG00000013295	BRD4	42.0767	28.8595	38.9945	58.3161	44.2875	46.0086	12.2389	8.16263	54.735	17.6755	15.1035	37.8121
6647	6348	1042	ENSGALT00000039643	ENSGALG00000003741	MYO18A	29.6066	27.2066	49.1818	39.4345	31.8207	32.9752	14.9871	10.3646	42.1964	15.5479	13.0133	29.7772
4940	4641	1041	ENSGALT00000008313	ENSGALG00000005177	FAM120A	53.8608	50.1572	72.2309	53.8871	52.8914	40.8619	30.8641	16.5472	42.4765	34.4724	34.1064	43.5911
5608	5309	1040.81	ENSGALT00000003692	ENSGALG00000002342	GPC1	40.3407	44.696	1.63701	47.098	42.4093	33.424	25.7879	19.3801	35.2963	25.2474	38.2476	38.8769
1554	1255	1040.14	ENSGALT00000037197	ENSGALG00000012408	PSMC6	164.95	140.063	217.325	199.11	154.896	168.46	102.276	91.9546	173.015	158.106	155.546	186.764
9679	9380	1040	ENSGALT00000039556	ENSGALG00000003628	TLN2	23.1082	16.3261	33.4318	26.6364	16.2457	17.7413	6.4358	2.74424	23.691	9.36815	6.53411	18.2777
5073	4774	1039.29	ENSGALT00000013807	ENSGALG00000008472	EHMT1	34.7888	23.29	47.1263	52.2999	31.6019	40.2833	6.21847	1.82896	44.3901	12.4007	9.7527	30.2227
2781	2482	1039	ENSGALT00000029129	ENSGALG00000000751	ARNT	89.749	83.1524	132.482	100.568	84.2408	100.6	68.0679	56.8901	112.704	59.456	54.1116	98.4279
7534	7235	1034	ENSGALT00000017852	ENSGALG00000010967	DOCK7	35.3242	26.3243	2.08107	34.3342	28.54	31.6045	15.0956	10.0978	39.3967	19.2745	14.5854	35.4444
2241	1942	1032.06	ENSGALT00000006988	ENSGALG00000004304	TCF12	102.727	41.7701	95.5134	127.674	51.0397	68.4285	5.52614	1.42376	102.7	12.854	6.69445	56.6167
6644	6345	1028	ENSGALT00000026590	ENSGALG00000016481	PUM2	39.657	36.6154	66.9069	38.9231	37.7189	35.8032	17.7341	11.9855	39.7831	22.3544	23.099	38.4925
601	302	1027.72	ENSGALT00000043583	ENSGALG00000028649		1024.82	992.377	647.171	817.546	820.456	469.479	1353.53	1135.6	398.837	560.364	408.544	489.216
3347	3048	1027	ENSGALT00000019442	ENSGALG00000011916	SREBF2	74.3084	79.1335	146.207	80.947	67.2024	89.6095	42.3058	23.8638	102.317	32.3291	35.4954	89.5907
2657	2358	1027	ENSGALT00000026237	ENSGALG00000016271	PTP4A1	108.328	90.1306	219.962	104.634	97.4877	99.1637	64.953	39.8155	123.541	88.3717	67.5801	140.776
3274	2975	1026	ENSGALT00000007553	ENSGALG00000004741	EPHB2	34.6175	24.3226	45.6617	82.8525	39.1093	53.2712	12.6196	6.28287	45.4116	21.2433	11.6444	46.203
8768	8469	1025.45	ENSGALT00000015714	ENSGALG00000009650	PALLD	32.5712	25.035	54.1531	29.0889	27.1706	27.5111	13.2361	6.02841	31.865	16.7668	10.6848	31.1805
1002	703	1023.85	ENSGALT00000045666	ENSGALG00000004184	SPARC	264.832	258.485	324.915	349.886	321.552	237.068	129.743	103.715	227.616	86.5785	56.5992	289.472
5476	5177	1020	ENSGALT00000023990	ENSGALG00000014869	NNT	48.1555	39.6898	2.9752	47.3334	40.6156	51.1716	22.2708	13.6167	64.4897	32.4101	22.6483	45.6866
1917	1618	1020	ENSGALT00000038999	ENSGALG00000023510	ERP29	152.926	184.371	196.06	151.449	140.906	134.844	114.435	120.077	139.967	143.449	126.816	156.069
1574	1275	1016	ENSGALT00000010647	ENSGALG00000006596	SNRPD3	205.364	175.255	387.798	191.438	182.333	207.332	185.206	160.925	226.587	226.113	230.739	287.137
2149	1850	1016	ENSGALT00000040353	ENSGALG00000008873	POLE3	104.186	82.5316	178.115	131.937	109.06	116.02	78.5225	66.972	104.629	110.917	92.4751	135.164
1191	892	1015	ENSGALT00000027774	ENSGALG00000017188	YAP1	227.746	123.212	269.878	273.367	174.278	164.73	29.4143	8.02264	222.516	41.4038	16.1321	155.336
2139	1840	1012	ENSGALT00000008070	ENSGALG00000005034	ACAD9	118.599	94.3574	199.493	132.132	115.688	142.359	82.9489	68.6131	151.556	121.988	128.315	145.488
9027	8728	1011	ENSGALT00000024950	ENSGALG00000015472	CHD7	23.9939	16.5028	42.2546	27.828	18.2172	22.0199	8.21189	4.65025	30.7121	13.9711	22.2269	23.3529
6164	5865	1010.9	ENSGALT00000024855	ENSGALG00000015409	PROS1	45.3019	44.2677	101.909	41.4082	41.6612	50.9734	30.1706	21.7755	60.1397	39.3983	31.7549	55.0158
4143	3844	1009.86	ENSGALT00000000834	ENSGALG00000000597	PUM1	56.9599	33.1926	95.3735	63.1139	26.2506	60.6315	8.88807	0	70.2944	8.29118	7.40217	58.6769
2720	2421	1008	ENSGALT00000027389	ENSGALG00000016945	LECT1	74.5449	83.4618	116.591	100.026	105.978	111.705	67.4921	52.9853	112.515	109.218	75.0673	117.077
3963	3664	1007	ENSGALT00000008222	ENSGALG00000005120	FBLN2	97.5651	85.8266	109.062	66.0267	52.5513	56.8406	27.5375	13.6426	82.7453	17.4223	11.0548	57.9417
1198	899	1006	ENSGALT00000018681	ENSGALG00000011457	CCNI	233.094	219.953	444.305	268.834	299.589	511.137	146.52	117.383	539.777	146.087	108.488	313.881
5021	4722	1004	ENSGALT00000009656	ENSGALG00000006001	PRPF6	46.8636	32.1417	75.17	51.0803	37.9249	42.3055	29.4989	19.0455	53.0687	30.4424	27.7652	47.8523
4696	4397	1002.11	ENSGALT00000004104	ENSGALG00000002606	calsyntenin-1	82.6297	65.4087	128.361	54.7526	30.3643	47.6589	3.38744	0.531153	107.798	2.97206	3.62596	48.2425
4622	4323	1002	ENSGALT00000016841	ENSGALG00000010344	DHX36	50.9113	41.8457	1.96162	55.6837	50.3333	50.42	31.2594	24.8553	61.047	39.5491	32.3004	58.9543
5432	5133	1001	ENSGALT00000019424	ENSGALG00000011901	KIF15	42.8773	27.5733	73.4668	46.8499	34.9803	39.2078	17.6826	12.3185	46.3381	33.2461	27.3071	38.9078
1264	965	1000	ENSGALT00000001001	ENSGALG00000000707	PSMD7	249.635	225.424	347.382	248.953	239.927	207.159	237.85	208.526	267.379	344.116	400.96	261.744
4506	4207	999	ENSGALT00000011680	ENSGALG00000007215	KIF5B	48.9542	36.5631	85.8529	57.0477	48.4078	46.3902	18.5578	8.96209	60.5743	31.9365	27.1102	56.0551
6505	6206	997.771	ENSGALT00000022062	ENSGALG00000013552	NUP98	40.0719	28.4457	58.2968	38.6247	32.5955	38.0187	19.9714	12.4662	43.9777	14.2605	13.2829	38.4135
15510	15211	997	ENSGALT00000017157	ENSGALG00000010541	BIRC6	16.3808	10.307	22.9712	15.7465	10.6704	12.2206	4.747	2.59807	14.2096	6.23743	5.43082	12.0195
1912	1613	996	ENSGALT00000040352	ENSGALG00000004219	PSMD13	174.074	145.584	249.563	148.344	153.5	145.755	119.154	92.9031	169.893	140.834	135.8	200.386
2486	2187	995	ENSGALT00000008749	ENSGALG00000005451	HELLS	115.273	76.2649	202.817	109.3	81.2363	101.251	49.8415	35.9448	131.48	90.4045	69.2088	135.185
1447	1148	995	ENSGALT00000015576	ENSGALG00000009565	EIF2S1	234.474	179.579	368.438	208.222	225.554	216.02	164.723	157.422	239.297	294.53	314.76	261.005
1377	1078	994	ENSGALT00000043056	ENSGALG00000025810	CCNB3	191.543	153.034	266.017	221.52	175.767	248.44	193.031	180.426	233.891	190.349	157.217	220.11
5844	5545	992	ENSGALT00000036246	ENSGALG00000006097	PLXNA1	32.7154	29.3153	55.0869	42.9789	23.5088	38.3124	7.48233	3.17826	53.5101	7.83752	7.97752	36.8817
4322	4023	992	ENSGALT00000000627	ENSGALG00000000461	MRC2	51.4585	53.2242	67.7111	59.2389	50.6806	52.8773	16.2517	7.22148	64.0164	14.0474	9.40589	46.0117
2537	2238	992	ENSGALT00000000055	ENSGALG00000000041	GNAI3	112.587	97.9119	91.7901	106.487	94.9031	96.9817	81.6368	71.6831	102.442	80.3066	63.8214	101.643
3790	3491	991	ENSGALT00000009867	ENSGALG00000006113	ZNF326	61.1343	49.9937	105.89	68.1976	60.0281	71.0777	36.1124	26.924	81.5665	65.8012	55.1123	78.4755
3259	2960	991	ENSGALT00000017833	ENSGALG00000010957	USP1	72.2816	46.1242	4.44352	80.4317	63.5334	78.8763	45.5093	30.4549	104.055	66.2577	47.894	98.9201
1194	895	991	ENSGALT00000022565	ENSGALG00000013919	PRPF19	259.621	213.817	327.37	266.009	229.656	219.563	230.117	192.375	223.711	158.479	158.398	247.945
4118	3819	986	ENSGALT00000000957	ENSGALG00000000675	CTPS1	49.8064	41.112	75.1346	62.0258	48.1294	64.7321	45.9415	41.8118	62.888	44.2266	52.8909	67.1154
1423	1124	985	ENSGALT00000001147	ENSGALG00000000790	DNAJC8	175.872	139.686	400.17	210.531	188.542	376.436	191.774	155.462	395.67	257.481	252.727	327.005
1790	1491	985	ENSGALT00000004988	ENSGALG00000003150		143.139	112.934	204.287	158.71	141.024	195.677	110.305	116.265	187.16	115.95	106.52	168.514
8762	8463	984.132	ENSGALT00000004336	ENSGALG00000002747	FASN	23.3882	12.1742	27.098	27.9367	10.0495	17.6382	8.02116	4.05393	23.533	8.55955	9.307	18.162
2919	2620	984	ENSGALT00000003498	ENSGALG00000002235	TFCP2	89.3493	66.9611	91.6833	90.2276	85.1239	93.5986	39.8123	22.0538	103.968	46.542	36.6153	100.243
3989	3690	983	ENSGALT00000012112	ENSGALG00000007492	YME1L1	71.5738	53.8957	146.799	63.9989	59.9281	71.1595	34.3094	20.9565	93.825	55.6951	43.9075	89.445
5453	5154	983	ENSGALT00000008325	ENSGALG00000005181	SEC24C	49.5351	40.485	76.1895	45.8199	43.7305	43.5821	27.4816	15.3768	55.5102	27.5201	21.1983	49.7188
2681	2382	980	ENSGALT00000042931	ENSGALG00000028714	MARS	93.5169	81.3893	81.3732	98.8393	98.4892	119.688	91.8359	74.4344	153.164	85.0086	70.9266	123.507
1409	1110	979	ENSGALT00000045077	ENSGALG00000026809	SARS	185.3	144.932	238.703	211.887	164.953	197.578	222.922	172.145	208.11	182.998	174.771	205.959
4032	3733	977	ENSGALT00000001975	ENSGALG00000001293	IGF2BP1	50.7752	39.3771	65.6463	62.8756	50.4407	38.6034	42.8284	28.7265	50.8956	32.7934	87.3745	30.2904
2743	2444	977	ENSGALT00000002455	ENSGALG00000001613	GNL3	91.4174	71.3176	189.987	96.037	96.184	122.012	64.9367	57.3813	134.986	104.868	93.987	137.892
1832	1533	976	ENSGALT00000038309	ENSGALG00000015105	PSIP1	118.335	79.0377	8.91846	152.951	118.212	138.122	54.8243	38.8079	162.835	123.988	148.101	134.249
5592	5293	976	ENSGALT00000009044	ENSGALG00000005637	GBF1	37.4987	27.7286	72.0634	44.2989	26.1117	38.5042	14.9517	6.92149	58.7558	13.2333	11.8815	41.101
2637	2338	975	ENSGALT00000012953	ENSGALG00000007977	API5	93.337	71.1446	181.132	100.186	90.0356	111.4	47.5348	25.9027	125.341	91.6469	72.4893	123.289
3380	3081	974.071	ENSGALT00000015425	ENSGALG00000009474	ACTN1	56.4537	50.719	73.4858	75.9529	59.5343	59.2906	33.3908	22.8469	65.2608	35.2124	31.1354	52.1711
2825	2526	974	ENSGALT00000043310	ENSGALG00000028846		105.506	82.2445	40.5596	92.6341	94.2775	96.297	60.2953	37.3789	96.7978	52.8115	35.868	88.6268
3223	2924	973.459	ENSGALT00000003015	ENSGALG00000001948		63.1935	49.8759	97.8459	79.9808	62.6993	72.8549	32.3186	23.5933	84.5149	30.2721	26.4325	72.4202
4610	4311	971	ENSGALT00000003170	ENSGALG00000002040	ARVCF	47.3091	23.805	78.4827	54.1111	33.5393	46.7658	9.84677	2.57669	70.0358	16.9493	13.4753	45.7544
1757	1458	970	ENSGALT00000007351	ENSGALG00000004618	TAX1BP3	183.431	169.333	366.543	159.83	187.157	233.23	163.716	116.699	292.19	191.728	164.493	268.013
2497	2198	970	ENSGALT00000024970	ENSGALG00000015483	PNISR	80.8336	73.2951	156.214	106.02	80.2923	105.512	34.0157	25.4631	119.628	57.7229	56.7387	105.449
4009	3710	970	ENSGALT00000009401	ENSGALG00000005850	FNBP1L	61.9838	50.8452	93.902	62.8121	60.0508	52.5474	30.9621	18.598	62.6549	39.7333	29.1618	61.8768
5423	5124	969	ENSGALT00000002661	ENSGALG00000001733	LRIG2	31.0821	29.7533	55.4248	45.4318	32.6902	42.9804	19.816	13.1948	40.0356	22.5862	17.89	41.6049
4043	3744	969	ENSGALT00000012430	ENSGALG00000007668	BMP7	47.1702	48.2563	72.5257	62.1775	52.9428	61.584	27.8607	18.8285	50.1017	35.7584	25.3382	51.9065
3327	3028	967	ENSGALT00000043552	ENSGALG00000026129	DCTN1	60.7909	42.5334	44.6947	76.7213	67.4122	58.9571	35.611	23.7392	74.3768	35.9598	37.138	60.066
5652	5353	966	ENSGALT00000003690	ENSGALG00000002340	ZNF609	35.7328	28.1404	61.9769	43.3536	34.9991	40.2686	15.7604	9.11856	53.068	12.9958	11.2505	38.9745
6383	6084	966	ENSGALT00000013942	ENSGALG00000008559	CUL4B	38.0606	28.5742	79.1073	38.1446	37.6284	35.1393	18.0917	11.1479	48.0082	26.8981	21.1115	44.2496
7750	7451	965.588	ENSGALT00000013221	ENSGALG00000008141	COL4A5	28.8244	32.935	44.8938	31.1331	19.4146	23.3515	28.6999	16.4371	65.8552	17.0047	11.5259	26.2007
1342	1043	965.108	ENSGALT00000006424	ENSGALG00000004034	CAPZB	254.405	208.47	298.073	222.299	196.901	149.739	184.068	167.979	171.378	214.546	287.481	185.093
6274	5975	962	ENSGALT00000016183	ENSGALG00000009956	ESPL1	38.8219	31.5327	29.2542	38.6797	34.8352	33.9552	24.1517	18.9843	34.6726	23.6321	19.3559	33.7741
8234	7935	961	ENSGALT00000009788	ENSGALG00000006068	TNRC6A	30.7287	25.8086	43.9038	29.0952	26.5582	23.4887	12.6348	6.59563	30.6927	13.7624	10.9479	24.3319
2086	1787	960	ENSGALT00000006006	ENSGALG00000003786	BRD7	133.238	94.3546	230.687	129.06	118.061	141.311	77.829	73.8756	187.099	159.191	125.261	158.331
3535	3236	959	ENSGALT00000006321	ENSGALG00000003969	EMC1	72.4233	82.271	113.325	71.196	59.5748	73.7026	46.374	34.7888	89.634	36.7476	32.1157	84.0731
9117	8818	958.998	ENSGALT00000038214	ENSGALG00000010706	TENM3	16.6684	18.4819	41.7763	26.1272	17.3991	25.1323	6.28103	2.10993	25.9022	18.8103	2.78164	27.7113
3742	3443	958	ENSGALT00000017682	ENSGALG00000010878	USO1	58.1512	55.7134	76.8053	66.8458	53.66	52.3032	35.7175	25.7793	64.515	30.1459	28.4821	50.7504
3101	2802	957	ENSGALT00000008832	ENSGALG00000005503	WFDC1	86.3068	93.7145	141.008	82.052	73.524	76.8037	62.1975	47.4198	83.1307	72.4937	51.1653	80.7772
1861	1562	956	ENSGALT00000009542	ENSGALG00000005931	RUVBL1	158.152	97.4573	222.368	147.036	127.808	163.842	92.3858	69.8155	173.34	145.942	112.938	179.681
908	609	956	ENSGALT00000002429	ENSGALG00000001602	NUTF2	401.258	357.199	829.226	377.126	458.932	572.094	510.867	479.675	521.755	476.003	476.073	706.653
6889	6590	956	ENSGALT00000006529	ENSGALG00000004104	INTS1	29.8958	23.7559	41.2306	34.8512	22.5141	24.1348	15.5696	9.06011	29.5041	12.6579	9.78569	23.4441
2474	2175	956	ENSGALT00000004517	ENSGALG00000002863	ERGIC1	103.644	102.631	221.282	105.595	106.559	129.289	62.7682	42.92	141.478	99.3935	70.8158	159.192
1865	1566	955	ENSGALT00000004189	ENSGALG00000002659	WDR5	152.382	121.474	258.49	146.507	140.908	154.516	116.396	81.914	191.506	139.368	114.351	200.625
2633	2334	955	ENSGALT00000019518	ENSGALG00000011966	RANGAP1	91.9539	75.5562	123.161	98.2987	78.3468	78.5204	74.5318	57.7976	85.1232	68.6825	64.8499	85.54
2774	2475	955	ENSGALT00000014015	ENSGALG00000008606	NDUFS1	87.6854	70.3324	137.612	92.6987	89.1564	78.4534	59.0814	42.6804	94.231	60.01	66.7541	86.9014
4943	4644	953.671	ENSGALT00000003347	ENSGALG00000002140	AP2B1	49.0898	39.2836	66.1472	49.3346	47.7883	41.7395	32.9259	24.6008	44.298	29.0341	19.2801	42.0333
1948	1649	951.081	ENSGALT00000015751	ENSGALG00000009677	SSB	123.983	84.0482	195.388	138.561	116.102	112.108	72.1154	54.4146	130	132.647	149.494	125.035
4188	3889	949	ENSGALT00000005842	ENSGALG00000003688	NUP155	65.1675	62.8984	2.84805	58.6238	45.0154	55.6643	35.7625	26.4207	80.1414	40.2786	32.8901	63.6796
1964	1665	949	ENSGALT00000035031	ENSGALG00000021616	MARCKSL1	116.724	107.281	170.777	136.93	144.875	165.956	138.237	117.65	180.003	157.47	156.206	147.675
3825	3526	948	ENSGALT00000005954	ENSGALG00000003750	PLCG1	57.8838	51.7288	73.0341	64.5909	60.1023	60.2502	32.2451	22.2948	69.1263	26.3211	27.6605	51.4659
10356	10057	948	ENSGALT00000008535	ENSGALG00000005321	LAMA5	13.2897	12.7835	22.6805	22.6457	16.7495	20.8351	3.89212	2.13469	20.0046	3.45069	1.74879	19.047
1344	1045	947.208	ENSGALT00000000469	ENSGALG00000000349	PSMC5	204.271	172.933	363.465	217.758	222.138	282.139	231.1	186.312	299	222.962	259.987	285.865
3013	2714	946	ENSGALT00000019224	ENSGALG00000011778	ITGB5	72.1492	80.991	92.0794	83.7388	76.8656	73.4493	62.7994	39.7483	78.5022	55.1947	43.202	71.4893
4067	3768	944	ENSGALT00000015198	ENSGALG00000009332	RBM25	46.9759	36.1127	99.5298	60.1875	48.5928	56.1551	27.7115	18.17	79.0017	37.4318	51.9095	60.9579
739	440	944	ENSGALT00000025792	ENSGALG00000016007		516.27	471.641	783.898	515.424	518.15	644.569	596.793	602.013	633.559	819.108	760.674	603.659
412	113	943	ENSGALT00000022716	ENSGALG00000026713	H2AFV	1928.81	1719.68	1240.54	2004.84	2362.55	2031.05	1651.77	1778.89	1327.84	2714.69	1528.12	1875.39
4054	3755	942	ENSGALT00000045186	ENSGALG00000028849	SCAF11	52.6801	32.0564	103.147	60.2679	43.7276	58.8577	13.6907	7.99288	86.933	25.2246	20.8641	61.4048
7410	7111	941.724	ENSGALT00000034761	ENSGALG00000001774	NEO1	28.7328	32.2718	38.3606	31.8155	26.8555	16.9031	15.0679	8.8637	23.2738	15.3237	10.4178	18.0429
4384	4085	941	ENSGALT00000027008	ENSGALG00000016736	CYFIP1	51.0693	37.7665	82.9518	55.3405	42.335	44.1179	33.4722	20.0283	56.2183	41.5415	36.4002	53.1004
7294	6995	940	ENSGALT00000034715	ENSGALG00000005439	ACACA	28.6988	20.0709	45.4987	32.2839	20.5351	28.1839	6.66319	2.4889	37.0519	6.78182	5.71433	30.2234
3114	2815	939.931	ENSGALT00000016555	ENSGALG00000010185	HSPA4L	71.7789	47.8534	121.172	80.2164	63.2811	70.6112	33.2663	19.5026	86.6154	54.8543	46.9532	74.9864
2972	2673	937.049	ENSGALT00000000855	ENSGALG00000026291	CDH3	71.4795	63.6654	106.697	84.2188	64.3513	71.8753	65.6595	44.3472	79.9233	42.095	35.645	73.2645
8398	8099	936	ENSGALT00000011863	ENSGALG00000007331	SVIL	21.8552	17.9531	38.5274	27.7645	21.0614	25.8897	9.16572	4.85315	30.2856	14.5451	8.42306	25.7054
1757	1458	935	ENSGALT00000005208	ENSGALG00000003290	PRRC2C	109.601	56.9646	150.154	154.063	56.8762	96.8957	41.9897	30.8412	146.79	46.2941	127.208	84.3641
8521	8222	934	ENSGALT00000004022	ENSGALG00000002548	TLN1	29.4776	23.0258	0.673562	27.2907	26.1484	21.7558	13.1797	7.28773	26.1592	7.76398	4.73191	19.6829
5187	4888	934	ENSGALT00000000200	ENSGALG00000000146	SUPT6H	40.3601	22.3915	48.2226	45.9051	30.7885	35.5954	10.8664	5.57206	43.0741	12.5711	8.17752	29.4726
2775	2476	933.968	ENSGALT00000040531	ENSGALG00000003971	TCEB3	114.847	91.8239	119.321	90.6206	126.159	177.771	131.898	146.788	111.794	126.041	127.194	145.969
2613	2314	932	ENSGALT00000042982	ENSGALG00000027392	OSBP	90.6735	71.3909	148.233	96.7605	99.1372	122.502	57.615	37.3877	106.292	47.3307	33.6264	101.393
3963	3664	931	ENSGALT00000002822	ENSGALG00000001826	WWC1	28.3958	23.6613	56.7746	61.0435	47.3284	73.6358	14.5256	11.019	48.0881	28.3276	22.255	47.9482
3163	2864	931	ENSGALT00000010339	ENSGALG00000006404	DDX46	64.8774	46.3991	120.673	78.0948	52.8769	78.8251	26.2546	18.423	105.117	54.9719	85.2283	72.36
1251	952	930	ENSGALT00000034531	ENSGALG00000021397		260.75	238.063	4.72652	234.688	227.321	201.359	221.604	268.593	176.666	312.361	313.504	226.789
4589	4290	928	ENSGALT00000038513	ENSGALG00000004386	Sox9	28.0767	30.6047	23.2206	51.968	55.5117	37.5199	20.5109	17.2786	19.5234	22.3956	42.3632	24.5739
8138	7839	926	ENSGALT00000004057	ENSGALG00000012137	KTN1	26.0683	25.399	35.4339	28.3789	19.9818	22.6562	10.6806	6.79903	27.1296	15.1088	10.4701	20.6445
6621	6322	926	ENSGALT00000019115	ENSGALG00000011693	ARHGAP35	32.0071	25.6268	21.4618	35.1886	29.2983	34.3877	7.69306	3.44654	41.3778	7.68003	6.06973	31.4202
967	668	925	ENSGALT00000019655	ENSGALG00000012039	PSMA3	307.909	272.17	528.776	332.668	331.04	424.884	292.668	279.973	346.39	565.27	548.115	450.541
1944	1645	924	ENSGALT00000014184	ENSGALG00000008716	FLRT3	57.6526	52.7022	82.6916	134.943	96.7999	133.793	38.3835	24.803	98.1933	57.0957	36.6104	111.603
4693	4394	924	ENSGALT00000023476	ENSGALG00000014554	ATN1	44.4119	39.2535	76.37	50.5193	48.2296	49.7503	36.3128	29.607	56.0419	22.7881	20.8622	43.6236
3175	2876	923	ENSGALT00000029510	ENSGALG00000014155	OGDH	78.6597	70.0203	102.719	77.1007	65.7177	76.1325	64.0089	49.8763	80.4214	43.949	38.3595	66.1211
1978	1679	922	ENSGALT00000005240	ENSGALG00000003307	TMED2	145.701	167.238	248.617	131.925	137.475	134.289	130.224	89.7601	155.054	125.627	130.144	171.943
3983	3684	922	ENSGALT00000032997	ENSGALG00000009553	SMC4	62.5661	46.201	2.67769	60.1252	54.7029	50.1888	29.8778	20.5268	57.0205	58.2057	42.9663	49.7822
1662	1363	921	ENSGALT00000009300	ENSGALG00000005789	UQCRC1	193.28	197.663	257.881	162.334	146.988	157.214	169.258	142.229	186.825	147.978	144.285	192.969
18527	18228	920.9	ENSGALT00000010124	ENSGALG00000006264	KMT2C	10.7221	7.98226	17.1028	12.1372	8.65807	8.89815	2.52712	1.34022	12.2316	3.05558	2.48679	9.42925
687	388	920	ENSGALT00000042849	ENSGALG00000026778		545.926	473.272	163.696	569.641	602.207	510.117	624.822	562.949	404.123	398.797	407.959	424.592
1020	721	919.526	ENSGALT00000035726	ENSGALG00000022174		265.047	199.564	78.797	306.39	244.794	250.849	199.313	136.494	130.642	328.771	342.552	367.435
3478	3179	918	ENSGALT00000003545	ENSGALG00000002262	ETF1	69.8871	49.0308	102.215	69.3741	67.4802	61.9553	45.7477	26.2738	72.007	62.5946	51.6359	63.0458
6968	6669	918	ENSGALT00000014479	ENSGALG00000008906	EHBP1	24.1014	17.7765	37.5762	33.0695	28.0218	31.7915	17.5602	12.7325	28.0115	20.0749	19.3395	26.5517
3501	3202	918	ENSGALT00000000310	ENSGALG00000000231	BNIP3L	69.1516	52.3029	134.094	68.8758	64.413	67.9169	45.1676	29.0205	102.7	74.1265	57.0906	88.0074
1632	1333	917	ENSGALT00000003923	ENSGALG00000002490	UQCRC2	165.108	150.559	252.389	165.266	147.46	162.187	147.383	137.497	182.85	144.979	128.741	190.481
2830	2531	915	ENSGALT00000012459	ENSGALG00000007686	TRAP1	83.9535	73.5412	129.78	86.8509	77.9427	64.9385	57.1	41.5672	93.4042	59.437	60.0128	84.9537
1937	1638	915	ENSGALT00000018560	ENSGALG00000011377	METAP2	128.339	89.8793	217.65	134.2	122.166	135.619	94.9363	57.1864	143.089	131.687	149.67	157.02
4845	4546	914	ENSGALT00000025147	ENSGALG00000015596	MAP3K7	51.172	41.7952	108.193	48.3017	51.8139	60.6888	30.5002	19.219	80.1272	52.1064	35.0537	71.4481
6527	6228	914	ENSGALT00000019364	ENSGALG00000011870	HIF1A	30.9053	27.2193	55.1591	35.2568	31.2199	27.9254	17.5364	12.708	37.7572	21.4708	17.286	34.2197
2062	1763	913	ENSGALT00000013392	ENSGALG00000008229	ALDH7A1	128.772	127.906	4.61371	124.412	117.524	123.433	100.789	73.7302	167.425	85.6902	87.6672	128.49
4578	4279	912.124	ENSGALT00000015940	ENSGALG00000009799	MEIS2	50.1591	32.2759	107.536	51.2102	43.5977	69.0091	41.5715	28.9576	65.3973	50.6874	102.293	53.6693
1908	1609	912	ENSGALT00000003921	ENSGALG00000002488	PAIP2	155.605	120.208	199.631	136.171	120.11	115.837	116.136	94.2626	125.338	175.614	125.207	141.574
3502	3203	911	ENSGALT00000002842	ENSGALG00000001838	XPO7	68.6719	52.3576	110.711	68.3293	60.9262	58.6543	32.8995	26.3104	76.0972	26.9874	35.6081	72.9151
2390	2091	911	ENSGALT00000026560	ENSGALG00000016461	DDX1	114.697	91.519	207.659	104.667	98.1853	108.372	63.9125	59.7639	140.839	109.858	97.8743	146.654
3774	3475	909.538	ENSGALT00000037965	ENSGALG00000011387	POLR2B	62.8984	50.0492	110.119	62.8798	49.9584	64.0296	35.9195	26.1003	77.3587	52.2883	43.6738	76.8222
3554	3255	909	ENSGALT00000024152	ENSGALG00000014974	MIB1	67.4109	40.0565	119.044	67.0901	43.3316	71.793	17.4321	6.62838	92.6385	25.1868	14.5724	73.5766
2750	2451	909	ENSGALT00000007944	ENSGALG00000004954	DUT	114.503	83.5542	257.583	89.0976	100.44	100.082	98.0842	85.3686	134.286	152.111	127.422	161.546
10553	10254	908	ENSGALT00000016788	ENSGALG00000010313	MAST2	20.8914	16.1328	32.8101	21.2735	18.0636	17.5965	8.30039	5.26024	24.8429	8.21258	5.82125	18.1507
3590	3291	906	ENSGALT00000039801	ENSGALG00000007307	USP7	64.5253	46.6708	137.409	66.1372	54.4872	63.1538	27.5149	17.2335	89.9832	53.8375	42.4292	83.8018
1453	1154	906	ENSGALT00000000089	ENSGALG00000000065	PSMA5	172.456	144.928	114.126	188.611	167.876	152.735	195.291	143.553	150.926	155.604	197.665	179.857
8421	8122	905	ENSGALT00000027898	ENSGALG00000017261	TENM4	30.3004	25.8588	31.962	26.7689	17.1039	20.9774	9.75696	4.35283	34.9401	6.72278	4.72456	21.0309
1815	1516	904	ENSGALT00000010437	ENSGALG00000006462	PPP2CA	157.584	132.085	305.144	143.257	151.166	139.246	116.929	101.666	173.19	141.234	113.904	210.454
6663	6364	904	ENSGALT00000019023	ENSGALG00000011642	ANKRD17	32.1522	18.7	51.5872	34.1259	20.4923	26.5386	6.95515	2.81959	34.0088	8.85504	8.96077	29.3248
1045	746	903.115	ENSGALT00000001752	ENSGALG00000001162	PHB	282.581	277.46	600.792	290.837	307.125	320.62	338.155	364.969	352.602	379.925	410.118	444.075
5557	5258	903	ENSGALT00000007684	ENSGALG00000004813	IARS	43.5323	33.1928	75.0117	41.2584	34.5081	39.0164	27.6277	19.4807	49.2555	34.1209	33.5505	40.4244
18231	17932	903	ENSGALT00000008254	ENSGALG00000005141	HMCN1	10.9569	8.22272	7.37343	12.0977	9.86811	8.37984	2.52784	1.42356	8.42128	1.7311	1.30772	8.95073
2604	2305	902.524	ENSGALT00000003479	ENSGALG00000002222	NOC2L	76.2838	60.9621	119.88	94.0661	73.7387	91.1192	49.5382	37.5299	94.7728	60.4203	48.3166	93.7331
6033	5734	902	ENSGALT00000014573	ENSGALG00000008962	MSH2	39.1974	27.4611	63.7159	37.7915	35.2281	40.5569	23.8018	17.8077	49.6383	36.3888	24.352	44.8878
3261	2962	901	ENSGALT00000016792	ENSGALG00000010314	NEK9	66.3335	44.5566	89.5115	73.0778	51.925	64.4785	23.3334	5.04836	83.429	27.8933	20.6921	59.2479
10763	10464	900.661	ENSGALT00000038024	ENSGALG00000008521	TP53BP1	18.0709	11.2613	26.4664	20.678	14.6954	16.0334	9.01948	4.61021	20.5336	11.6998	7.91113	16.3709
3798	3499	900	ENSGALT00000025065	ENSGALG00000015548	RNF20	51.731	39.6043	1.48382	61.7937	50.8431	62.1115	30.3906	21.9784	78.0432	37.3977	41.2778	49.3959
3651	3352	899.632	ENSGALT00000004630	ENSGALG00000002925	ETFA	76.8949	57.9169	118.216	64.4772	63.2979	72.799	57.8853	51.8711	78.5972	78.785	62.0944	84.4224
5431	5132	898.84	ENSGALT00000020769	ENSGALG00000012722	5-MCDG	35.933	24.2289	69.045	42.0767	38.6434	41.2525	13.9637	7.82201	47.5538	28.5073	27.9695	50.4133
1390	1091	897.841	ENSGALT00000029894	ENSGALG00000000230	CBX1	153.213	119.108	275.941	197.706	159.813	195.774	51.5828	24.4302	230.459	90.1693	47.1884	192.631
1143	844	897.536	ENSGALT00000014135	ENSGALG00000008684	EIF4A2	155.271	0.15155	14.0007	255.479	135.023	368.878	0.85077	0.9149	436.148	147.898	3.65e-05	343.08
6512	6213	897	ENSGALT00000006070	ENSGALG00000003830	NUP214	31.7313	24.2818	49.7769	34.6846	22.8916	28.9046	16.7376	9.00818	36.2176	12.4524	12.7813	28.5005
2929	2630	897	ENSGALT00000020695	ENSGALG00000012684	DEK	78.9167	57.4489	145.163	81.9374	74.5595	86.0269	46.5154	34.0326	95.0981	79.3532	74.9786	104.936
1952	1653	897	ENSGALT00000006376	ENSGALG00000004003	AIFM1	109.341	126.369	190.652	130.366	99.3328	132.889	86.5256	72.3043	125.096	106.223	111.234	155.978
3272	2973	896	ENSGALT00000023534	ENSGALG00000014598	FNBP4	54.9612	42.9376	75.9662	72.4033	52.3687	73.3627	35.337	28.4177	72.0203	35.34	24.7386	58.6458
13081	12782	892	ENSGALT00000011356	ENSGALG00000007021	PCNT	15.1525	10.8415	22.4893	16.7653	9.96256	10.9806	5.14843	4.5959	13.2864	7.16121	6.54625	10.8501
4582	4283	891	ENSGALT00000009474	ENSGALG00000005891	DGCR2	50.9507	50.312	79.6018	49.9776	46.1147	45.9142	36.8057	26.5089	59.4093	29.6972	26.2558	49.5677
3604	3305	890	ENSGALT00000023124	ENSGALG00000014301	SUPT5H	59.3282	42.9618	33.9843	64.694	56.3295	66.9573	46.9226	37.0034	71.8802	37.0401	32.4128	61.6332
1877	1578	890	ENSGALT00000015109	ENSGALG00000009288	RNPS1	141.756	104.977	187.211	135.497	131.452	123.229	104.426	83.9986	121.257	123.176	101.998	130.889
5486	5187	889	ENSGALT00000005463	ENSGALG00000003449	DNAJC7	34.0219	29.1287	66.6963	41.1747	35.5726	50.1173	26.8338	20.2828	57.2405	35.5087	36.8867	55.6204
2876	2577	887	ENSGALT00000023989	ENSGALG00000014868	SERINC1	89.8049	109.844	188.039	82.6903	77.8349	99.0352	63.5306	40.3693	117.723	83.0855	61.4234	131.34
4140	3841	887	ENSGALT00000038723	ENSGALG00000000787	DHX38	49.9378	38.5069	79.4803	55.4785	45.0244	51.843	34.0991	25.1102	61.0205	29.5918	26.5021	57.5273
3728	3429	887	ENSGALT00000018712	ENSGALG00000011476	40787	63.2511	57.4672	76.8161	62.1443	53.8791	49.8114	27.9939	18.5023	57.6871	27.1585	22.0705	49.4637
3697	3398	886.582	ENSGALT00000010979	ENSGALG00000006788	CREPT	67.6434	54.0164	135.714	62.6817	64.2804	61.3627	37.2792	27.3751	76.4071	52.8636	43.4175	87.955
4817	4518	886	ENSGALT00000045990	ENSGALG00000028828	EIF4E	52.4929	40.4426	101.049	47.1122	50.2003	54.4663	30.9961	26.2412	59.2451	51.7599	46.5953	66.3479
4151	3852	885.85	ENSGALT00000043414	ENSGALG00000027326	MFAP2	58.0973	83.0048	53.3566	55.2483	66.9538	39.3733	53.537	59.1929	37.8972	41.6782	37.8262	47.8216
2643	2344	885	ENSGALT00000042684	ENSGALG00000027224	MAP1S	73.6932	42.4222	108.46	90.705	61.6843	66.8564	14.3787	8.24761	76.2799	15.7561	10.0043	67.1795
2566	2267	885	ENSGALT00000001916	ENSGALG00000001262	CLIC4	107.44	86.6221	176.804	93.7858	90.5627	95.4912	48.6472	34.0639	120.711	69.308	52.896	121.543
629	330	885	ENSGALT00000027671	ENSGALG00000017129	chSAP18	649.153	484.742	817.069	644.28	532.648	697.626	557.524	609.134	695.329	964.309	847.885	740.68
1174	875	883	ENSGALT00000044511	ENSGALG00000028358	NUDT16L1	241.774	206.742	294.307	242.437	211.414	147.212	235.62	201.777	207.541	227.051	238.764	190.517
496	197	883	ENSGALT00000044427	ENSGALG00000027042	FUS	1140.9	976.022	659.749	1076.81	1182.47	1380.69	607.998	477.116	1273.5	777.367	936.055	1217.3
1783	1484	883	ENSGALT00000013336	ENSGALG00000008187	EIF3J	130.781	113.62	259.245	142.946	148.217	139.099	135.19	115.158	186.352	186.008	291.618	182.775
1266	967	883	ENSGALT00000027718	ENSGALG00000017163	ACAT1	226.221	196.72	336.462	219.371	215.244	260.115	170.629	121.057	281.095	242.984	159.281	302.665
1322	1023	881	ENSGALT00000003025	ENSGALG00000001956	OLFML3	201.972	197.74	196.409	206.893	228.865	272.388	170.15	221.344	183.175	223.769	175.047	220.754
2132	1833	880	ENSGALT00000012947	ENSGALG00000007974	NUP85	128.657	102.29	200.161	115.336	106.076	111.224	96.0668	75.2265	124.919	122.975	120.082	144.077
4373	4074	879	ENSGALT00000006060	ENSGALG00000003824	CHERP	52.4186	41.7782	86.4467	51.8338	47.1466	55.431	31.442	24.9325	58.1227	33.956	29.9575	55.9602
14509	14210	876	ENSGALT00000020015	ENSGALG00000012256	UTRN	14.9721	10.1043	24.8451	14.81	9.51005	12.309	4.93879	2.60821	18.212	7.04651	4.5757	12.3811
2698	2399	876	ENSGALT00000006564	ENSGALG00000004122	PNRC2	101.472	75.5009	190.738	87.7242	103.799	103.52	80.4706	55.163	102.968	106.304	101.97	121.472
7286	6987	875	ENSGALT00000015908	ENSGALG00000009781	DOCK1	27.0135	16.8046	52.833	30.0859	21.573	29.0168	12.3647	7.38352	34.4704	16.2221	11.3655	29.8779
4705	4406	875	ENSGALT00000025818	ENSGALG00000016026	C20orf194	34.1189	41.8321	101.654	47.71	45.0418	55.883	4.11522	1.67268	58.2983	6.25056	2.78211	73.6753
9803	9504	874.54	ENSGALT00000019028	ENSGALG00000011643	UTP20	21.8821	14.9944	35.2705	22.1064	14.611	21.6567	9.42031	5.24991	25.6677	10.3771	8.37383	21.971
918	619	874	ENSGALT00000036785	ENSGALG00000015844	SOD1	359.866	342.238	605.861	339.208	347.322	341.257	360.634	421.196	372.407	481.687	422.749	512.156
5126	4827	872.222	ENSGALT00000002415	ENSGALG00000001590	PBRM1	41.797	27.6488	66.1772	43.4106	31.5692	41.8623	13.9534	8.5032	46.3513	19.8205	14.1327	43.3433
6037	5738	872	ENSGALT00000003306	ENSGALG00000002117	PARG	37.5428	28.1954	72.2052	36.5091	29.2334	34.358	20.0748	11.1686	42.4781	24.6915	21.0842	42.333
1191	892	872	ENSGALT00000036925	ENSGALG00000016403	ID2	437.547	384.175	433.24	234.854	274.924	186.879	322.481	274.326	234.524	255.562	206.132	205.744
10786	10487	872	ENSGALT00000005741	ENSGALG00000003627	BPTF	19.7531	13.865	26.3547	19.9761	13.7874	15.855	6.89552	4.09432	20.8774	10.8384	10.4182	13.7191
1089	790	870.898	ENSGALT00000002523	ENSGALG00000001652		249.875	182.325	437.04	264.841	227.881	341.879	132.713	98.5616	372.778	215.814	170.681	334.854
1259	960	869	ENSGALT00000007067	ENSGALG00000004442	PPA1	244.544	177.533	275.639	217.467	185.559	210.155	194.649	178.46	241.13	215.073	213.738	200.327
4154	3855	869	ENSGALT00000022966	ENSGALG00000014201	PARVB	65.5692	56.6652	117.441	54.1553	58.0985	50.424	33.8922	21.5003	69.5595	34.8939	31.1064	70.3274
5897	5598	869	ENSGALT00000039668	ENSGALG00000004548	NUP188	37.5525	28.8599	56.2348	37.2934	27.0524	30.891	19.7576	16.6185	39.0416	14.7588	14.2807	33.1453
1942	1643	868	ENSGALT00000001221	ENSGALG00000000833	IK	104.729	84.897	153.998	126.919	110.434	133.698	85.1697	69.1039	142.184	111.618	90.502	120.399
3838	3539	867.366	ENSGALT00000005832	ENSGALG00000003681	TOP1	46.3477	41.4148	79.8203	58.8799	47.6419	42.9132	46.104	31.2584	44.604	53.8318	60.0747	46.4331
5785	5486	867	ENSGALT00000013446	ENSGALG00000008265	PDCD11	38.1976	26.2968	55.8055	37.9672	25.1069	29.8694	16.8559	8.7612	39.7507	20.7766	23.6071	30.3407
1989	1690	866	ENSGALT00000045330	ENSGALG00000028003	OTUB1	112.787	107.714	69.5325	123.105	147.345	229.873	181.19	139.104	221.533	134.888	121.728	171.011
3773	3474	863	ENSGALT00000044182	ENSGALG00000027397	DUSP22	61.5103	44.0158	120.457	59.6797	54.4053	73.5863	27.662	15.7108	93.6036	38.5375	29.9155	80.9894
2054	1755	862	ENSGALT00000005653	ENSGALG00000003570	PURH	138.708	134.064	175.036	117.998	134.214	98.7765	135.281	122.937	105.234	89.9812	84.119	109.941
4010	3711	861.501	ENSGALT00000023766	ENSGALG00000014737	KIF2A	49.2179	46.4317	2.84789	55.7713	53.4533	52.8195	30.8915	23.6931	54.1027	42.291	40	56.1294
2613	2314	861	ENSGALT00000004754	ENSGALG00000003010	NUP93	93.6134	61.3607	148.383	89.3892	66.0575	85.3196	64.0218	43.7113	104.624	63.7726	57.5795	100.873
3972	3673	860	ENSGALT00000010518	ENSGALG00000006507	CLMP	57.3425	60.7739	108.371	56.2501	54.8024	67.1123	29.1252	21.0535	79.968	36.1462	25.6829	70.9885
1004	705	858	ENSGALT00000038520	ENSGALG00000014942	NSA2	259.585	200.757	7.85536	292.377	242.287	234.841	244.025	225.283	247.048	332.155	343.209	232.869
3830	3531	858	ENSGALT00000029631	ENSGALG00000006089	ATF1	60.0263	52.6494	82.9292	58.3761	61.9575	64.978	45.0671	34.9072	78.6749	50.3134	46.7903	74.5955
1745	1446	857	ENSGALT00000002340	ENSGALG00000001540	SF3A3	152.759	115.504	234.82	142.383	121.395	147.505	95.8879	85.905	178.437	162.934	128.632	180.056
2524	2225	857	ENSGALT00000039062	ENSGALG00000006974	DDX27	87.706	72.6102	118.383	92.5329	78.5747	72.8828	65.4801	48.292	84.1759	74.909	75.9313	79.1288
1576	1277	856	ENSGALT00000035036	ENSGALG00000003189	NFYC	148.638	118.851	237.301	161.038	141.901	163.421	108.411	89.8298	214.973	131.391	128.127	176.35
9401	9102	856	ENSGALT00000036890	ENSGALG00000014615	laminin	24.2683	19.9997	29.5474	22.5934	16.2487	15.3267	8.96424	5.19845	22.5488	5.49174	4.56719	16.3694
1177	878	855	ENSGALT00000016708	ENSGALG00000010273	PPP2CB	254.469	206.554	395.01	233.947	242.982	243.252	181.608	126.151	290.686	253.472	221.559	297.763
3945	3646	854	ENSGALT00000023144	ENSGALG00000014320	UGDH	66.6938	56.1688	105.756	56.2713	61.2993	47.8762	42.9728	34.8022	55.2065	51.8265	45.8991	63.7609
4476	4177	854	ENSGALT00000013858	ENSGALG00000008507	THOC2	43.43	31.5961	78.5559	49.1178	32.1832	41.3831	13.7885	8.56618	57.4518	29.2313	49.7613	43.6037
10128	9829	853.795	ENSGALT00000015897	ENSGALG00000009690	CENPF	16.0407	11.6606	29.394	20.8684	15.2632	14.7011	6.09049	6.29182	16.8921	17.8966	24.7798	14.2216
3405	3106	853	ENSGALT00000010690	ENSGALG00000006623	ATP11C	54.0679	44.3957	83.8571	65.9771	31.2623	67.8046	8.89379	1.58184	72.7265	13.1719	6.00562	53.4266
1515	1216	852	ENSGALT00000018443	ENSGALG00000011305	SRSF11	155.984	125.001	7.40073	168.326	157.762	165.563	65.1694	47.3437	198.301	83.9154	106.504	169.855
3959	3660	852	ENSGALT00000006762	ENSGALG00000004250	B4GALNT4	46.2483	45.074	66.7192	55.9247	54.0933	46.745	30.948	20.6322	51.2253	26.3578	16.309	47.7587
2756	2457	850	ENSGALT00000006576	ENSGALG00000004133	SRSF10	94.8968	72.3295	207.366	83.1111	80.0017	86.9252	43.0187	25.9958	113.733	72.3712	59.8681	133.817
4322	4023	849	ENSGALT00000008104	ENSGALG00000016781	MAP4K4	43.6668	33.0884	74.637	50.6994	36.6451	46.9629	14.5815	5.52231	61.354	20.2203	25.9656	42.8048
1953	1654	849	ENSGALT00000023681	ENSGALG00000014692	LMNB1	110.484	70.8502	5.33629	123.315	87.56	114.698	36.8205	25.5075	128.462	74.6868	51.2334	107.478
7101	6802	848.593	ENSGALT00000045337	ENSGALG00000027524	TNKS1BP1	24.5277	22.0113	41.5744	29.9715	28.9261	27.3967	23.7622	17.4648	30.0904	13.7566	11.153	26.3805
1284	985	848	ENSGALT00000040727	ENSGALG00000024112	PSMD11	203.941	173.951	278.483	206.826	194.521	201.011	186.243	123.291	209.442	154.342	121.2	201.856
2394	2095	847	ENSGALT00000011085	ENSGALG00000006853	QARS	94.3581	76.2469	111.273	97.1281	89.2018	88.526	81.5581	54.8574	93.4524	67.0956	55.458	88.2348
3734	3435	846	ENSGALT00000019185	ENSGALG00000011745	WBP11	56.6557	41.2034	108.775	59.1683	50.6211	72.0097	41.8554	26.9587	84.5255	45.6949	35.5304	80.2887
1880	1581	846	ENSGALT00000020119	ENSGALG00000012311	UBE2D3	150.852	140.615	307.705	128.554	155.561	154.797	157.658	101.134	184.074	181.242	211.362	225.082
4956	4657	846	ENSGALT00000004133	ENSGALG00000002624	BMS1	45.7419	28.0951	67.7463	43.6425	35.3596	38.6535	22.1467	15.2289	50.2663	31.1408	26.3216	40.1822
882	583	844.799	ENSGALT00000000735	ENSGALG00000000533	SRSF3	456.497	415.759	809.192	348.121	346.672	512.592	346.111	261.722	520.005	368.588	348.068	632.405
9935	9636	842	ENSGALT00000025640	ENSGALG00000015908	COL12A1	21.4699	18.726	26.976	20.9923	13.681	14.5876	7.96938	4.0347	26.6065	5.63346	5.58619	17.1818
2849	2550	841	ENSGALT00000013744	ENSGALG00000008435	SUMO1	97.6606	90.5723	213.377	79.2321	98.1153	178.451	102.265	78.871	169.864	145.332	125.61	188.01
733	434	839	ENSGALT00000014281	ENSGALG00000008783	RAB1A	541.541	438.839	849.765	464.427	530.213	647.443	285.565	196.883	709.907	558.268	435.943	699.434
2705	2406	838	ENSGALT00000039568	ENSGALG00000009061	ACTL6A	85.266	68.4719	6.18597	83.6746	80.9119	94.3598	64.8098	44.6147	118.871	80.7863	64.2383	132.868
3574	3275	837	ENSGALT00000013715	ENSGALG00000008419	SEC13	62.1116	54.75	77.7332	61.3988	56.4837	47.5902	44.2585	36.103	49.7006	60.3209	60.3746	59.1032
6948	6649	835.547	ENSGALT00000040636	ENSGALG00000000332	FTSJ3	25.4838	20.1681	41.9682	30.1898	23.2363	27.1225	15.4706	13.856	33.4371	13.7629	10.4995	26.7888
7179	6880	835	ENSGALT00000043625	ENSGALG00000027591	TSC22D2	35.2275	32.3459	1.13195	29.157	31.5922	28.83	31.2064	23.1781	37.1944	26.2387	22.3098	35.2419
1236	937	835	ENSGALT00000021284	ENSGALG00000013039	BID	196.451	171.449	299.028	214.088	187.088	170.573	160.27	155.597	179.391	196.737	155.28	241.286
2586	2287	834.114	ENSGALT00000022281	ENSGALG00000013702	NPEPPS	71.8928	54.0106	25.9269	87.6202	49.8085	78.6541	20.5715	15.5048	92.4459	31.8263	37.6945	64.1661
7459	7160	833.546	ENSGALT00000017568	ENSGALG00000010805	USP24	26.003	13.6973	1.40191	27.968	15.4237	18.4651	5.86181	1.16356	25.4659	10.4941	8.45151	18.4908
3280	2981	833	ENSGALT00000024124	ENSGALG00000014957	WDR1	84.3908	85.492	140.784	67.1318	72.5963	79.3184	47.6575	35.6865	90.7953	62.3198	57.5686	95.4017
1786	1487	833	ENSGALT00000004380	ENSGALG00000002774	TSPAN3	154.198	212.244	297.711	134.58	145.852	209.347	143.165	118.158	205.249	200.835	163.794	253.94
2622	2323	833	ENSGALT00000017099	ENSGALG00000010501	SNW1	77.6323	59.3598	134.845	86.1472	66.9203	83.6782	59.0446	52.8297	101.684	99.1601	96.5883	97.1612
2142	1843	833	ENSGALT00000016192	ENSGALG00000019355	CPSF6	106.826	78.1534	228.56	108.584	106.013	109.506	63.8899	44.8562	150.21	89.4853	76.3432	152.079
1568	1269	833	ENSGALT00000018400	ENSGALG00000011276	BTG1	159.245	145.242	291.303	157.699	180.217	182.197	150.446	91.0695	166.827	193.688	175.132	221.417
12170	11871	832.964	ENSGALT00000005708	ENSGALG00000003605		15.0009	10.097	0.658675	16.8572	11.0317	13.9379	5.10266	3.48969	20.7132	8.47036	6.78265	14.1965
2521	2222	832	ENSGALT00000021345	ENSGALG00000013071	CALD1	71.136	59.7027	87.1547	89.9549	68.7925	74.1603	30.5282	16.7279	99.1847	53.0158	72.6758	63.5536
3756	3457	831	ENSGALT00000017890	ENSGALG00000010982	NID1	105.799	90.1759	162.05	57.7493	25.8329	53.3819	30.5439	11.3081	127.893	21.3206	10.6375	50.7827
2512	2213	831	ENSGALT00000019869	ENSGALG00000012165	DLGAP5	94.0885	56.2439	145.458	90.2122	68.0047	87.4856	37.207	17.5682	109.835	62.439	50.5742	98.3328
4027	3728	830	ENSGALT00000033329	ENSGALG00000007810	PPP4R2	49.9845	43.3363	93.9128	53.4869	52.3462	52.2367	31.2418	25.4416	59.5829	47.4412	37.8845	67.5323
5616	5317	830	ENSGALT00000026316	ENSGALG00000016312	POLA1	38.1322	24.7361	65.0005	37.5022	29.6818	30.9786	19.7587	12.3141	41.5405	27.2453	21.2501	37.5256
7027	6728	830	ENSGALT00000002108	ENSGALG00000001386	PI4KA	30.8885	23.5392	41.954	29.6372	23.3516	22.9451	12.1749	7.54075	26.7333	16.1131	11.0108	24.8055
2057	1758	829	ENSGALT00000015757	ENSGALG00000009681	BUB3	127.469	110.925	207.223	113.287	114.902	104.69	117.395	104.986	128.107	138.635	115.504	144.611
7783	7484	828	ENSGALT00000045629	ENSGALG00000025759	TFDP2	27.1266	18.0602	2.0812	26.5792	22.9184	24.7811	15.4199	11.56	34.141	18.7183	15.5244	31.9245
5046	4747	828	ENSGALT00000039018	ENSGALG00000023516	PHRF1	32.0332	23.0566	61.3214	41.9041	29.1648	34.2957	11.1218	6.00757	47.1383	24.0111	18.3004	37.1157
3421	3122	828	ENSGALT00000013141	ENSGALG00000008095	KIF23	60.5841	42.346	99.2259	63.7152	49.4153	58.3842	30.0293	20.9375	73.6209	42.4746	31.9227	67.1095
3533	3234	828	ENSGALT00000040518	ENSGALG00000004838	BUB1B	67.1887	50.4485	113.021	61.5086	48.2884	75.062	32.4522	17.1409	83.3641	45.483	38.2331	71.9033
6196	5897	827	ENSGALT00000010500	ENSGALG00000006498	PTPRN2	26.7816	18.0972	71.4616	33.6915	20.5526	28.352	9.7306	4.87224	44.2945	15.5492	7.95322	45.4384
5099	4800	827	ENSGALT00000044213	ENSGALG00000026421	PSMB2	49.1866	45.367	76.0397	41.3914	45.1345	40.6443	55.306	49.1321	49.2311	57.4744	67.1747	56.9823
3217	2918	827	ENSGALT00000021833	ENSGALG00000013384	LIG1	58.6484	52.7926	2.43166	68.0872	64.124	73.799	54.0594	44.766	72.8817	41.5707	36.1636	79.9717
1233	934	827	ENSGALT00000013068	ENSGALG00000008054		201.367	133.507	359.468	212.718	199.071	230.259	112.709	74.9034	288.96	218.333	172.897	243.076
3761	3462	825	ENSGALT00000010972	ENSGALG00000006783	PLOD2	69.5449	75.9801	5.04893	57.2496	53.9114	64.7595	34.5972	24.5889	73.2471	62.0301	58.6529	78.3474
2312	2013	825	ENSGALT00000001501	ENSGALG00000001018	EI24	102.045	100.378	156.299	98.459	89.6666	101.384	83.9267	74.92	121.61	63.6604	69.6311	115.737
3468	3169	824	ENSGALT00000008877	ENSGALG00000005534	TM9SF3	70.1663	74.4605	155.697	62.467	60.0888	95.0146	47.1861	26.6938	112.478	65.7559	47.0898	108.441
2819	2520	824	ENSGALT00000004849	ENSGALG00000003072	RPA1	82.7849	55.7127	154.589	78.5547	70.0327	84.3867	46.0063	33.4837	103.308	60.644	56.045	105.501
1967	1668	824	ENSGALT00000010835	ENSGALG00000006703	GTPBP4	107.558	75.8487	182.09	118.68	90.3661	115.306	63.7511	49.8825	134.268	107.368	98.7311	127.884
3378	3079	824	ENSGALT00000011857	ENSGALG00000007330	CTNND1	62.2533	43.3069	88.527	64.2929	47.65	52.6448	21.8579	7.87451	74.2103	19.9053	12.8089	56.7295
7536	7237	823.606	ENSGALT00000014411	ENSGALG00000008871	LPHN2	34.3305	40.6527	66.3355	27.3405	26.9792	24.3041	12.8323	6.71232	32.2278	11.9215	14.2162	33.1807
966	667	823	ENSGALT00000019325	ENSGALG00000011842	SNRPD1	251.576	206.736	316.288	296.428	255.382	209.576	253.61	187.516	228.138	368.024	391.527	252.109
4065	3766	823	ENSGALT00000005250	ENSGALG00000003314	RILPL1	50.1886	44.9533	76.5596	52.5007	47.9285	48.9267	31.5779	23.5683	62.1845	38.6775	30.9924	49.8569
1979	1680	823	ENSGALT00000036438	ENSGALG00000017142	PSPC1	98.3733	76.7968	165.234	117.689	91.8301	105.294	64.0576	43.1686	120.443	78.6477	65.3506	117.221
5131	4832	822.798	ENSGALT00000003954	ENSGALG00000002509	COL5A2	39.4541	40.408	48.1944	40.9083	32.2504	30.1396	5.79496	2.35864	47.2126	4.98428	2.69256	29.8323
3284	2985	822	ENSGALT00000021889	ENSGALG00000013420	FOXM1	61.175	53.5133	91.9526	66.1566	58.0942	67.3979	31.5504	22.2563	67.0112	31.6781	26.4246	67.6684
4678	4379	821.684	ENSGALT00000026061	ENSGALG00000016171	FAK	35.3081	31.4532	75.1369	45.0791	39.1592	41.7807	27.06	22.9277	40.2299	35.5784	33.3478	54.8942
1203	904	821	ENSGALT00000014121	ENSGALG00000008675	SLC25A5	233.576	209.675	333.874	218.183	215.086	204.139	306.992	259.697	186.794	262.735	286.523	257.159
1593	1294	820	ENSGALT00000007249	ENSGALG00000004555	RBM22	170.085	112.542	273.772	152.239	157.016	254.58	128.087	111.266	203.35	125.483	118.618	216.992
8667	8368	820	ENSGALT00000002030	ENSGALG00000021511	CHD6	17.8052	12.1278	20.4541	23.5417	12.7049	14.4285	4.2571	1.36574	16.7316	4.39448	2.42021	12.0919
4236	3937	818	ENSGALT00000025419	ENSGALG00000015763	GABPA	51.3289	40.2844	100.972	49.9153	45.7268	46.9635	23.6233	14.5143	69.9979	38.4532	29.7817	56.9438
2294	1995	816	ENSGALT00000010401	ENSGALG00000006446	NAP1L4	112.126	81.0954	214.963	98.2636	87.3966	97.7553	60.0379	44.4368	124.932	98.387	83.6167	136.181
2292	1993	813.4	ENSGALT00000036523	ENSGALG00000014089	PUF60	83.6597	67.1477	142.637	98.0489	82.7354	111.073	75.8402	58.6634	129.752	80.9408	75.5615	111.731
4519	4220	813	ENSGALT00000013637	ENSGALG00000008372	XRN2	47.4126	39.2544	81.8155	46.2832	41.7645	52.7581	26.5378	20.5012	58.1697	34.1015	29.3	57.2761
3631	3332	813	ENSGALT00000039667	ENSGALG00000008989	WDR43	61.0892	48.2818	129.226	58.618	55.9439	75.5321	41.9329	28.4973	95.971	76.8721	71.0182	81.0815
4435	4136	811	ENSGALT00000038754	ENSGALG00000001169	CRB2	35.5399	30.0937	49.1239	47.107	21.3064	31.0068	7.71044	2.09176	38.4243	7.77478	3.3503	24.4185
4501	4202	810.59	ENSGALT00000008983	ENSGALG00000005600	TBRG4	44.3507	39.9674	65.3352	46.3437	45.7545	48.2524	41.5542	41.9344	49.5156	28.7489	37.0316	51.0841
2319	2020	809	ENSGALT00000045184	ENSGALG00000026102	CHTOP	96.3428	74.3467	148.475	96.215	98.4786	102.996	102.116	72.6511	98.1164	86.8456	87.3309	121.628
5831	5532	808	ENSGALT00000013823	ENSGALG00000008482	STAG2	37.1807	26.4072	77.3967	35.0893	27.7168	41.2442	16.0217	10.2909	47.688	27.3663	24.1815	46.5501
4414	4115	807	ENSGALT00000002080	ENSGALG00000001363	MYBBP1A	43.1119	28.5884	78.0152	47.1139	35.998	49.8538	23.4567	17.4943	60.2168	29.9425	33.415	49.4244
2590	2291	807	ENSGALT00000045319	ENSGALG00000026349	HSD17B12	73.1273	91.1773	162.261	84.6241	65.0707	102.342	56.145	41.1198	143.749	81.8536	68.8586	121.485
687	388	807	ENSGALT00000015106	ENSGALG00000009286	ATP5G3	693.753	748.322	446.932	499.675	460.332	272.306	583.039	583.044	245.21	621.582	550.813	351.572
2381	2082	806.887	ENSGALT00000001637	ENSGALG00000001093	TCF3	82.9513	45.3054	151.709	93.1059	67.9545	88.5231	19.8183	7.91408	108.534	20.1256	18.4735	91.1616
4485	4186	806.375	ENSGALT00000032671	ENSGALG00000007537	INCENP	43.0108	22.8799	68.8332	46.2789	26.1532	39.0896	19.9311	4.8884	43.4132	18.5127	15.753	36.8621
867	568	806	ENSGALT00000020373	ENSGALG00000012466	FKBP25	375.505	303.261	499.08	340.904	321.523	329.759	342.504	256.492	379.174	447.583	511.375	395.142
708	409	805	ENSGALT00000028041	ENSGALG00000017357	SRSF2	459.844	371.64	549.656	472.844	356.404	302.648	206.012	137.363	342.087	224.579	196.764	327.181
3990	3691	805	ENSGALT00000027331	ENSGALG00000016910	RBM26	49.1846	39.568	106.295	52.3959	47.1742	58.0151	28.6307	18.9542	67.7616	45.0702	71.186	61.7327
1346	1047	805	ENSGALT00000031908	ENSGALG00000010026	PPP1CB	202.183	144.525	416.873	184.712	184.807	227.051	79.0503	46.5185	345.418	159.647	101.806	279.237
455	156	805	ENSGALT00000014762	ENSGALG00000009070	HSPE1	1163.57	985.681	2016.67	1239.7	1150.99	1555.19	1302.99	1052.34	1735.47	2219.2	2589.62	1556.35
4235	3936	804	ENSGALT00000045275	ENSGALG00000026722	UNC119B	48.1564	38.2134	103.724	49.0734	41.5367	58.364	34.2245	25.1283	66.2404	32.0323	28.706	65.265
1205	906	803.539	ENSGALT00000001151	ENSGALG00000000793	VPS72	175.144	170.969	261.091	213.071	212.264	248.162	195.118	178.579	209.027	261.405	239.278	267.64
3038	2739	803	ENSGALT00000021086	ENSGALG00000012929	DNM1L	65.3545	46.6889	109.878	70.4318	58.5678	57.8612	30.3343	18.4449	73.4172	43.7062	40.8619	71.0446
3648	3349	803	ENSGALT00000001245	ENSGALG00000000848	AP1G1	67.4704	52.9288	100.51	57.6031	53.5436	59.4381	32.1658	25.7056	69.7545	38.027	36.7611	65.1477
5478	5179	803	ENSGALT00000008337	ENSGALG00000005189	ANKRD13A	40.024	31.8099	42.138	37.249	34.5783	43.4538	24.1157	16.0863	54.497	26.373	21.096	46.8168
3673	3374	802	ENSGALT00000004434	ENSGALG00000002803	MTA1	53.015	47.4111	95.6106	57.1051	47.0549	52.0716	40.6522	27.2878	62.5455	31.6588	26.8532	60.7289
6407	6108	802	ENSGALT00000006838	ENSGALG00000004295	CPD	31.578	35.1676	39.9508	31.5443	23.2464	22.5497	16.0998	12.0833	29.5891	10.1123	8.55103	24.4969
3324	3025	800	ENSGALT00000040675	ENSGALG00000024094	UBAP2L	68.4796	45.9605	96.6294	63.5346	66.3076	70.3458	38.8196	24.9633	77.0343	27.786	23.961	65.8956
3966	3667	800	ENSGALT00000038897	ENSGALG00000004887	SART3	44.996	35.494	78.5793	52.4112	45.0347	47.8917	23.3848	16.3403	55.4166	30.6486	24.9982	51.2891
2526	2227	800	ENSGALT00000022198	ENSGALG00000013649	CNOT7	86.4893	74.3842	197.698	86.3009	93.2502	84.5507	68.0554	43.0688	111.224	79.631	83.7605	132.331
6957	6658	798	ENSGALT00000005766	ENSGALG00000003641	KAT6A	26.0645	16.0971	40.4975	28.7942	19.197	27.2067	7.25677	1.73256	30.4926	10.855	8.72518	21.5424
3085	2786	797	ENSGALT00000001579	ENSGALG00000001053	SRPR	69.9016	85.6769	81.3758	68.7262	63.7702	56.6563	62.1718	43.4366	63.5547	43.1975	42.2769	61.6062
6898	6599	796.774	ENSGALT00000020196	ENSGALG00000012365	PYGL	24.3091	23.6167	36.1717	29.007	26.6985	33.6557	21.5375	15.0115	35.4719	19.2357	19.3802	32.4908
3175	2876	795	ENSGALT00000006976	ENSGALG00000004375	VPS35	63.4936	47.7878	120.531	66.4085	60.3781	90.0441	36.3805	27.0364	93.003	56.1263	44.2895	83.8662
941	642	795	ENSGALT00000009695	ENSGALG00000006022	PSMA1	345.519	329.623	504.633	297.494	304.703	373.042	347.05	350.373	347.041	477.324	443.3	375.207
8385	8086	793	ENSGALT00000019563	ENSGALG00000011992	EP300	20.6201	16.8	31.5264	23.5605	22.2055	18.137	9.73445	5.2176	20.4178	11.2414	12.0617	16.6196
4229	3930	792	ENSGALT00000030642	ENSGALG00000011292	UBE2N	55.2557	43.2511	91.9922	48.4148	51.1585	58.7594	47.5749	41.3646	61.1363	62.0155	55.8722	70.3691
2038	1739	792	ENSGALT00000001810	ENSGALG00000001194	CIAPIN1	115.822	92.3793	198.142	109.414	105.561	113.083	110.889	79.1085	142.214	112.779	110.637	140.118
429	130	791	ENSGALT00000028346	ENSGALG00000017644	COTL1	759.283	635.379	766.804	1461.77	925.029	1011.55	475.033	409.982	751.897	629.415	516.558	1009.42
7104	6805	790.519	ENSGALT00000020263	ENSGALG00000012405	EZH2	26.7989	22.7913	47.5898	27.9081	22.7296	24.7232	17.5332	13.9011	29.5342	25.814	21.6883	30.5945
3572	3273	790.264	ENSGALT00000008880	ENSGALG00000005535	TCOF1	46.7619	41.8269	83.8462	58.0059	50.0645	53.0722	38.343	31.0848	59.1122	48.1931	67.5465	52.362
549	250	790	ENSGALT00000033073	ENSGALG00000009312	RPL22L1	958.256	952.963	20.7676	759.159	930.845	427.717	931.754	938.636	420.32	1379.23	1436.85	621.022
3345	3046	790	ENSGALT00000023014	ENSGALG00000014233	FBLN1	49.5277	59.6879	66.0209	62.3078	75.5457	56.0282	24.1606	16.13	46.0286	31.2528	20.1215	66.9776
3173	2874	786	ENSGALT00000017688	ENSGALG00000010882	G3BP2	65.1622	55.5801	100.803	65.7024	64.6947	63.2251	41.8982	24.6768	75.1055	45.8075	47.1019	64.8688
2174	1875	785.24	ENSGALT00000002354	ENSGALG00000001550		79.433	58.2447	142.458	100.611	80.8431	92.8033	30.7224	14.8376	126.135	52.3589	40.2847	100.448
3360	3061	785	ENSGALT00000009540	ENSGALG00000005930	PLS3	57.1287	44.528	76.9484	61.6101	58.427	58.1596	36.6208	24.9488	60.9645	49.7178	42.3092	54.7492
1991	1692	785	ENSGALT00000013428	ENSGALG00000008249	DNAJC2	98.6216	62.9383	169.074	111.459	96.3451	135.434	61.1449	52.205	150.384	122.31	174.502	121.884
2726	2427	785	ENSGALT00000042864	ENSGALG00000027710	DAG1	69.3043	67.4106	123.077	77.7043	60.8403	95.9068	46.9343	31.9942	108.698	48.8657	32.0608	84.8158
6971	6672	785	ENSGALT00000017461	ENSGALG00000010733		25.9298	18.5529	47.5717	28.2657	22.6978	25.3135	8.58434	5.60298	32.381	15.2462	10.2246	28.0753
5667	5368	783.716	ENSGALT00000002032	ENSGALG00000001332	RBL1	37.9285	31.35	71.1524	35.0745	30.8739	42.4966	18.6668	11.3304	53.3566	21.9748	15.2733	50.0676
7127	6828	783	ENSGALT00000018484	ENSGALG00000011329	MLLT4	22.3094	15.3964	40.9847	27.5495	18.5115	27.5042	5.24849	2.11177	32.4891	8.95272	4.293	24.8961
7497	7198	783	ENSGALT00000000338	ENSGALG00000000258	HEATR1	28.3713	19.5365	43.6145	26.1334	17.7569	22.1257	15.4251	9.28901	27.6688	16.5427	14.9565	24.2577
3268	2969	782	ENSGALT00000039734	ENSGALG00000003171	IREB2	62.9873	43.6085	114.54	63.2764	47.4261	67.8088	34.271	21.5488	81.7698	35.8702	29.0801	79.2157
5036	4737	782	ENSGALT00000008045	ENSGALG00000005027	DHX30	37.3102	32.2321	46.6909	39.6596	33.1166	29.7637	19.9264	15.3776	30.5141	15.8283	13.9511	31.6937
8505	8206	781	ENSGALT00000014003	ENSGALG00000008600	IQGAP1	26.3329	16.6098	32.5416	22.8647	17.6774	15.9042	6.39473	2.74636	21.4825	9.19527	7.07924	16.9391
5940	5641	780	ENSGALT00000013435	ENSGALG00000008254	ANAPC1	33.4828	25.9776	53.5051	33.2188	25.4222	26.7891	18.6238	11.9287	35.4084	18.3714	17.1007	31.1326
5407	5108	779.654	ENSGALT00000022959	ENSGALG00000014194	SAMM50	36.8797	33.953	77.4559	36.6688	37.0861	72.1598	35.7304	26.7836	57.2365	40.7811	43.3302	60.4098
3214	2915	779.446	ENSGALT00000015501	ENSGALG00000009519	ARG2	56.5126	52.2317	99.1098	64.2382	62.0576	82.0868	59.4773	48.589	67.0318	50.5051	47.49	82.4882
1987	1688	779	ENSGALT00000017615	ENSGALG00000010835	DTX4	101.621	70.6363	186.802	110.869	89.1555	101.942	39.2381	32.6501	128.733	43.3813	29.0474	120.861
5648	5349	778	ENSGALT00000009725	ENSGALG00000006039	SNED1	30.0988	32.8408	0.517669	34.9424	33.0377	36.6713	18.0653	14.1373	32.4888	14.7614	9.86402	28.4931
1548	1249	778	ENSGALT00000007835	ENSGALG00000004901	CORO1C	129.436	108.216	176.25	149.645	124.275	119.176	81.4657	59.0912	135.275	109.356	98.9959	134.734
3604	3305	777.81	ENSGALT00000001897	ENSGALG00000001250	APLP2	78.2355	78.627	81.8454	56.5389	64.2228	44.3547	52.8934	31.8502	87.8209	40.7691	32.8097	57.4929
1568	1269	777	ENSGALT00000039415	ENSGALG00000006300	LDHA	279.494	209.794	543.056	147.097	125.295	150.222	327.619	298.206	388.782	268.579	326.325	262.58
3886	3587	777	ENSGALT00000001367	ENSGALG00000000930	HIP1	40.31	35.2706	53.2651	52.0397	41.6262	43.5505	15.997	10.2134	53.6128	14.4235	13.3722	41.0966
4277	3978	776	ENSGALT00000020590	ENSGALG00000012611	RTCB	48.7545	38.668	72.9146	46.8643	46.2057	41.9223	35.9813	26.3397	55.3533	35.6558	36.3075	51.2537
5159	4860	776	ENSGALT00000022308	ENSGALG00000013726	PAICS	43.7215	32.1186	78.3414	38.3593	34.5632	38.3357	30.9656	20.5926	43.3619	35.1464	29.6087	52.9737
4807	4508	775	ENSGALT00000044199	ENSGALG00000025819	[2Fe-2S]	47.4313	45.378	52.2875	41.3013	39.5156	30.8044	48.7148	40.4206	38.1645	61.3385	71.0529	42.1697
1933	1634	774	ENSGALT00000011481	ENSGALG00000007089	KDELR2	125.551	192.453	194.67	113.798	127.815	96.8167	139.816	103.998	109.011	133.178	127.531	141.188
1214	915	774	ENSGALT00000001029	ENSGALG00000000726	ELAVL1	199.129	160.899	314.281	203.219	163.7	237.827	101.062	62.6803	267.754	144.797	100.767	228.161
2426	2127	774	ENSGALT00000018728	ENSGALG00000011491	DYNC1LI1	69.798	57.0202	128.963	87.4216	78.3074	81.1681	60.9253	53.4797	94.4962	80.3812	85.6939	96.2136
3764	3465	773	ENSGALT00000012114	ENSGALG00000007494	LARS	56.4732	42.8168	81.2623	53.5947	43.5691	46.024	30.2271	23.7969	60.2346	36.754	32.3004	51.1947
5894	5595	773	ENSGALT00000002246	ENSGALG00000001482	GIGYF2	26.0576	17.9759	1.79404	33.1913	23.7733	27.6928	11.9715	6.68152	36.1307	13.6002	12.669	26.3022
980	681	773	ENSGALT00000024737	ENSGALG00000015326	CLTA	278.919	267.976	16.7727	272.695	280.661	393.585	316.368	303.331	398.863	339.653	351.391	347.498
4043	3744	772	ENSGALT00000004283	ENSGALG00000002715	XPO6	47.6333	40.4769	76.1774	49.5367	40.3855	45.4504	34.4982	26.5596	54.4573	27.127	26.477	50.0654
3058	2759	771	ENSGALT00000031431	ENSGALG00000014647	RIT1	75.662	68.1236	139.442	67.1349	73.4711	83.442	42.5236	30.0799	89.9522	38.9466	27.6233	94.8722
8764	8465	771	ENSGALT00000007130	ENSGALG00000004477	NCOR1	20.3902	14.3544	26.6802	21.8813	15.7131	15.953	7.45905	5.67796	19.0705	9.23362	5.9812	14.8968
5060	4761	770	ENSGALT00000008456	ENSGALG00000005269	INTS2	36.954	29.9189	61.1047	38.8542	32.8504	32.0232	16.712	9.57937	39.8656	18.8247	15.5599	40.6594
5845	5546	770	ENSGALT00000006629	ENSGALG00000004169		28.717	27.2021	51.7692	33.3546	31.6512	33.3641	15.1158	8.85901	36.5195	14.2657	11.9161	30.4229
1158	859	769	ENSGALT00000006542	ENSGALG00000004115	DNAJA2	229.197	170.858	320.338	215.069	220.028	193.234	148.376	109.793	226.796	215.899	182.409	248.471
2016	1717	769	ENSGALT00000012884	ENSGALG00000007931	DLD	101.303	78.9851	136.273	107.597	85.8609	85.8264	61.2485	45.162	97.841	76.3967	63.6319	102.098
2658	2359	768.672	ENSGALT00000044596	ENSGALG00000026433		64.7073	51.2228	112.304	78.2814	73.5361	79.5525	62.5319	57.3119	93.4636	65.6637	36.4868	71.5811
5541	5242	768	ENSGALT00000036592	ENSGALG00000016751	TMEM131	32.0364	31.1237	58.4031	35.1973	25.6446	29.2334	12.4318	7.21296	36.5573	13.028	11.9971	32.9473
3145	2846	767	ENSGALT00000004204	ENSGALG00000002670	ZC3H15	63.0849	43.6543	109.578	64.745	52.7132	61.6326	46.8825	28.3723	78.1838	60.7453	106.179	72.4177
3071	2772	767	ENSGALT00000008918	ENSGALG00000005558	TBL3	70.7358	53.1105	108.071	66.4734	58.041	64.4019	49.2884	44.234	71.6034	40.9462	38.8374	72.4346
1969	1670	766.701	ENSGALT00000001152	ENSGALG00000000794	HARS	102.71	93.9138	149.27	110.295	102.74	114.526	78.4012	80.456	139.967	90.095	72.7629	115.606
2107	1808	766	ENSGALT00000024744	ENSGALG00000015330	PCNP	117.821	90.364	194.505	101.783	104.668	97.0168	74.6834	54.0542	112.236	105.393	73.9889	116.897
2269	1970	765.957	ENSGALT00000013365	ENSGALG00000008208	CASC4	85.5847	76.1107	140.025	93.4079	76.0333	96.1862	48.0755	26.4011	107.653	66.5045	54.1072	92.9913
9634	9335	765.824	ENSGALT00000045090	ENSGALG00000001099	ANKHD1	19.3493	15.3881	26.7502	19.7088	14.7407	13.7626	12.4625	9.8427	16.2157	9.525	12.6804	14.8182
5034	4735	765	ENSGALT00000016715	ENSGALG00000010277	YLPM1	37.495	22.7786	53.3993	38.8139	33.7293	32.3636	13.0646	8.5041	39.9215	18.9617	14.0696	31.5334
8317	8018	764.762	ENSGALT00000003171	ENSGALG00000002041	AGRN	19.8365	24.2818	30.5792	22.9142	19.6635	18.474	11.2154	8.30937	22.2236	8.78105	6.61998	21.9013
12168	11869	764	ENSGALT00000011038	ENSGALG00000006829	SMG1	13.7332	10.6977	21.0697	15.4641	11.6445	10.8467	3.91797	2.32174	14.1621	5.21739	3.32284	12.2655
9232	8933	762	ENSGALT00000015283	ENSGALG00000009381	SIPA1L1	19.113	15.0543	36.6159	20.4929	15.2602	17.7729	11.1874	8.19031	26.81	12.7417	9.6055	21.8471
4518	4219	762	ENSGALT00000006719	ENSGALG00000004222	HK1	41.9543	30.1489	66.7395	43.3901	37.4066	41.2061	26.8475	20.3035	56.5826	29.8836	31.0754	44.7735
2436	2137	761	ENSGALT00000039073	ENSGALG00000008618	UPF3B	73.903	57.1793	140.508	85.5511	82.3631	78.3362	60.191	48.8812	104.71	87.7522	129.935	93.1
2754	2455	760	ENSGALT00000016152	ENSGALG00000009934	NUP107	86.0091	60.9879	115.117	74.3717	63.9957	62.3625	48.1802	36.1975	76.6435	60.888	49.7136	76.7129
3957	3658	760	ENSGALT00000019249	ENSGALG00000011797	MTHFD1	57.9423	38.0695	89.9854	49.9132	42.2391	48.4935	33.3558	19.3295	63.6247	34.3796	34.8214	54.0604
911	612	759.801	ENSGALT00000039197	ENSGALG00000004848	YBX1	168.347	148.33	193.935	298.259	205.794	193.369	121.503	108.413	235.715	255.892	242.489	134.107
3424	3125	759	ENSGALT00000040104	ENSGALG00000012121	RCN1	69.4042	78.4215	94.9218	58.3495	72.1995	80.7167	46.8266	38.3145	78.7068	62.5046	40.2488	73.5816
3491	3192	759	ENSGALT00000003215	ENSGALG00000002066	NCOA4	60.8852	44.1263	104.532	57.1248	48.3316	53.1993	41.1324	28.4422	66.6861	41.9421	32.8923	69.8182
1650	1351	758	ENSGALT00000037367	ENSGALG00000020359	SIX6	56.3762	46.3177	114.906	134.791	112.619	152.426	80.1308	81.4309	98.9206	126.669	158.585	141.039
1496	1197	758	ENSGALT00000040808	ENSGALG00000024159	DDX21	160.766	131.497	282.8	152.132	132.24	213.034	109.661	65.7628	223.536	148.418	161.623	231.483
661	362	756	ENSGALT00000014768	ENSGALG00000009076	NDUFB5	520.285	477.721	20.0792	501.717	482.299	505.675	463.162	447.594	525.643	1135.44	1269.08	629.959
3807	3508	755.879	ENSGALT00000028017	ENSGALG00000017335	ILK	42.8408	41.8925	51.2955	51.7652	43.0366	51.4755	41.2511	37.1722	43.4254	39.3395	36.9576	47.3843
1711	1412	755	ENSGALT00000025198	ENSGALG00000015629	TRAM1	163.9	184.196	250.77	128.457	120.972	134.657	118.592	92.0583	163.394	122.888	119.273	171.269
3713	3414	755	ENSGALT00000020513	ENSGALG00000012561	PKP4	45.9081	31.3259	74.9231	53.1287	44.2892	51.5652	22.0249	14.6729	66.024	24.3402	23.8847	49.7366
633	334	755	ENSGALT00000022855	ENSGALG00000014121	COX5A	519.173	476.212	679.299	543.058	495.852	348.982	565.217	458.574	362.857	829.316	995.703	530.917
6480	6181	755	ENSGALT00000027197	ENSGALG00000016841	COL4A1	27.3206	34.1264	41.5229	29.345	24.9977	26.9577	13.9943	8.62281	36.811	9.68382	9.48474	25.906
2238	1939	754.221	ENSGALT00000001513	ENSGALG00000001024	TPRG1L	113.803	92.0655	183.762	93.4472	94.0839	91.9248	103.983	78.7732	120.188	97.0982	92.3024	117.433
3737	3438	754	ENSGALT00000016166	ENSGALG00000009944	MYST2	46.286	39.7114	118.849	52.6879	40.4753	56.2928	32.2638	20.5043	78.3052	45.9328	42.4753	77.6251
3392	3093	753	ENSGALT00000020904	ENSGALG00000012813	PRPF4B	50.457	30.2365	91.1478	58.4872	43.3096	58.611	15.3795	8.52951	76.9941	33.6601	25.5019	57.352
1686	1387	753	ENSGALT00000026646	ENSGALG00000016513	PPM1G	109.345	89.2466	157.716	130.426	101.86	110.382	63.9787	53.2119	116.528	75.5209	64.1699	107.057
4778	4479	752.728	ENSGALT00000027978	ENSGALG00000017312	PPME1	45.0067	36.8385	78.4756	40.3741	34.797	38.7438	27.6549	17.2825	55.8108	21.2503	19.9814	39.8269
3996	3697	752	ENSGALT00000037139	ENSGALG00000015803	KDM3A	47.2647	32.9902	87.1636	48.8668	39.3013	49.5717	19.9927	12.2785	54.732	29.1512	22.9213	55.4915
2491	2192	750	ENSGALT00000013674	ENSGALG00000008394	THUMPD3	72.5964	63.7378	137.535	82.1989	72.8596	107.255	55.7613	43.2205	125.458	64.998	65.1607	114.71
3724	3425	750	ENSGALT00000009365	ENSGALG00000005832	PPP1R7	49.6941	39.9285	2.17277	52.6073	44.0779	43.9564	37.5868	39.1996	49.3308	57.3086	52.9066	49.263
4687	4388	750	ENSGALT00000024450	ENSGALG00000000939	CDON	31.5534	28.2618	46.1844	41.062	33.0046	42.5885	17.9868	11.8298	40.4617	13.4231	9.83807	33.9983
9863	9564	749.809	ENSGALT00000043421	ENSGALG00000027239		11.3634	9.744	9.16194	18.8346	10.1746	11.5426	0.661798	0.0751936	13.5681	0.204196	1.16355	9.62488
7201	6902	749	ENSGALT00000026413	ENSGALG00000016377	PXDN	22.2828	24.1986	38.9906	26.0707	21.736	24.9008	8.48371	5.54007	24.8151	10.4021	7.64455	26.5716
9167	8868	749	ENSGALT00000023591	ENSGALG00000014638	ASH1L	17.6436	12.1881	20.7645	20.2909	16.491	15.1482	3.53598	1.65007	17.3551	4.8468	4.44731	12.1945
1393	1094	748	ENSGALT00000045242	ENSGALG00000028958	NOL9	171.307	162.028	206.6	164.259	152.032	147.389	154.038	126.14	157.087	121.648	111.56	184.114
1908	1609	747.21	ENSGALT00000045214	ENSGALG00000010961	IGF2BP3	97.179	27.6003	83.4877	111.566	34.0687	76.9585	0.243646	0	103.622	0	0	52.6835
437	138	747	ENSGALT00000013095	ENSGALG00000008066	UQCR10	1072.9	946.46	1383.25	1300.43	1037.47	814.875	1477.74	1705.85	900.594	2239.05	2282.44	1320.72
6474	6175	747	ENSGALT00000012413	ENSGALG00000007663	KDM3B	27.2175	21.6675	45.6271	29.0622	21.8082	24.7362	11.7798	7.00527	29.4399	14.1274	9.66657	25.9619
1082	783	746	ENSGALT00000018217	ENSGALG00000011174	PSMB1	259.79	224.64	362.483	228.888	219.358	246.99	273.249	264.226	252.383	310.249	274.986	306.107
1659	1360	745	ENSGALT00000022567	ENSGALG00000013921	TOMM20	125.345	106.077	165.555	131.602	98.3238	103.045	136.144	81.049	99.9688	135.312	157.144	137.874
3567	3268	745	ENSGALT00000011168	ENSGALG00000006895	CEP131	41.5509	30.5669	59.3647	54.7671	39.3276	50.5536	22.5846	14.2826	64.8695	20.2642	19.7331	42.6893
4005	3706	744	ENSGALT00000003013	ENSGALG00000001947	IKBKAP	47.9418	36.3484	1.91462	48.2295	41.3096	50.6743	32.4345	25.5926	77.5114	33.8055	35.0894	45.4253
7154	6855	744	ENSGALT00000012914	ENSGALG00000007952	AMOT	27.9423	21.1447	44.5849	26.0742	21.5749	23.8113	11.6692	7.33872	29.1659	10.752	7.15273	23.6817
6101	5802	744	ENSGALT00000039313	ENSGALG00000003835	10	32.7606	37.4145	41.9981	30.8064	32.2092	22.7625	20.2394	12.6838	25.2124	17.5324	13.4112	24.4046
5420	5121	743	ENSGALT00000022998	ENSGALG00000014222	NUP50	33.679	24.2609	76.2411	34.8562	28.5573	33.8375	22.7018	13.6822	46.2394	30.8061	31.2218	44.9636
6295	5996	742	ENSGALT00000005666	ENSGALG00000003580	MMP2	29.832	37.2286	37.8973	29.7295	34.7526	30.4703	15.4933	10.6168	29.3371	17.3899	12.5328	33.6875
2288	1989	742	ENSGALT00000007898	ENSGALG00000004935	LSM14A	96.3019	69.099	191.335	89.622	82.6714	106.595	39.5204	24.9167	126.958	67.3899	52.2506	121.203
1028	729	741	ENSGALT00000004875	ENSGALG00000003084	NUDT21	271.166	235.037	315.977	244.195	242.088	240.418	241.551	227.83	224.751	331.92	311.439	257.213
3842	3543	740.879	ENSGALT00000030604	ENSGALG00000012215	GTPBP1	43.0796	36.6991	68.3012	50.2367	40.4809	48.1831	22.8093	16.7064	52.08	22.024	19.2458	47.4277
4113	3814	740.116	ENSGALT00000012296	ENSGALG00000007603	RRP12	41.992	36.6657	68.6536	46.6192	41.0135	46.4774	33.0482	22.0955	57.8663	22.7076	21.3797	47.4039
2004	1705	740	ENSGALT00000003757	ENSGALG00000002388	GBAS	117.741	99.1594	188.492	104.268	101.846	101.839	82.3854	69.3474	118.79	134.542	127.222	137.608
1671	1372	740	ENSGALT00000019387	ENSGALG00000011881	CCNA2	135.915	94.7003	283.688	129.576	117.094	161.654	56.9821	37.134	192.563	95.1431	85.8479	196.221
2442	2143	740	ENSGALT00000030227	ENSGALG00000008633	38961	75.9369	59.5676	141.326	82.9574	67.6904	69.4592	61.1672	41.6171	82.4439	57.4958	53.7184	93.8427
6185	5886	739.178	ENSGALT00000026469	ENSGALG00000016411	col14A1	48.1889	26.375	55.4475	30.1699	27.4016	25.3861	20.4333	10.6023	49.0363	34.7485	26.1742	37.6162
6968	6669	739.164	ENSGALT00000045839	ENSGALG00000004363	MCM3AP	27.6765	15.2588	37.9266	26.6272	22.6445	18.7923	14.3937	9.91468	18.3705	13.1447	10.7087	21.0273
2141	1842	739	ENSGALT00000018600	ENSGALG00000011403	SRP72	90.5905	79.1841	115.188	96.383	82.856	71.7367	53.3284	45.9243	86.7487	80.3731	76.3846	82.6727
721	422	738	ENSGALT00000038920	ENSGALG00000010410	PFN2	444.73	359.113	29.5274	420.135	426.043	480.26	186.018	82.7642	537.567	213.512	194.491	503.976
2960	2661	738	ENSGALT00000004865	ENSGALG00000003078	MMD	78.248	68.9223	135.862	66.628	68.8078	72.0648	43.4884	31.9102	90.908	76.5144	57.081	101.194
3160	2861	738	ENSGALT00000000671	ENSGALG00000000490	LONP1	54.5952	60.5252	91.7036	61.9703	50.2073	68.3636	43.2443	27.4769	74.9746	45.1253	39.1195	65.7825
3596	3297	738	ENSGALT00000013852	ENSGALG00000008504	HNRNPLL	57.5302	46.5859	107.134	53.7753	44.6427	50.3881	43.7691	27.5688	54.6116	46.5453	48.0097	65.2162
2112	1813	738	ENSGALT00000020181	ENSGALG00000012355	DARS	102.266	72.9202	153.208	97.7921	91.7394	87.3751	69.2416	62.0351	112.619	101.942	87.6012	114.517
1767	1468	738	ENSGALT00000024590	ENSGALG00000015238	CD164	138.385	139.194	266.315	120.775	111.207	161.213	38.2889	17.1709	179.904	74.2817	43.9289	164.348
4240	3941	738	ENSGALT00000008944	ENSGALG00000005575	AKAP1	43.1538	41.5137	68.593	44.9879	36.9879	36.9433	22.9768	15.692	46.6669	26.8616	20.0146	47.29
2332	2033	737	ENSGALT00000029895	ENSGALG00000004683	TPD52L2	86.4099	80.0273	138.757	87.0915	89.1331	87.4987	88.4522	77.7556	96.1125	82.5317	88.0833	106.635
3617	3318	737	ENSGALT00000017969	ENSGALG00000011031	JAK1	46.0303	34.7011	2.9209	53.3625	35.3884	38.7791	12.8901	4.37794	52.8119	21.59	14.2957	44.4856
1280	981	734	ENSGALT00000001111	ENSGALG00000000766	ZMAT2	178.122	143.579	342.775	179.751	179.901	293.651	163.954	134.464	329.018	194.566	173.849	287
3047	2748	733	ENSGALT00000004530	ENSGALG00000002873	RSL1D1	60.5777	44.8799	79.919	64.0815	45.4799	49.9667	35.1642	32.8433	52.9162	69.2259	70.2075	60.8011
5452	5153	733	ENSGALT00000005938	ENSGALG00000003742	CPAMD8	31.4508	29.8508	42.7201	34.1735	22.0988	29.8895	11.8393	7.08881	38.4434	11.8937	9.10152	26.3983
5329	5030	732	ENSGALT00000041392	ENSGALG00000024479	POGZ	31.6895	22.8451	50.1643	34.9614	30.1542	30.8316	15.9879	10.2137	35.3741	14.1468	13.5623	34.8263
7576	7277	731.983	ENSGALT00000013205	ENSGALG00000008138	AP1B1	20.9076	18.0336	29.3694	24.1654	22.3927	23.2478	18.1598	14.3895	22.7629	12.7868	11.1723	20.9066
2538	2239	731.33	ENSGALT00000020462	ENSGALG00000012526	PRPF40A	66.294	50.6957	118.789	78.4702	64.1683	78.3107	35.5111	29.5921	88.1787	60.8925	63.4198	81.6604
1583	1284	731	ENSGALT00000015262	ENSGALG00000009369	PRDX3	145.646	135.393	286.552	136.772	151.799	205.383	168.541	126.357	202.829	187.21	154.408	215.481
1659	1360	731	ENSGALT00000013965	ENSGALG00000008574	CLNS1A	120.735	93.3608	206.658	129.129	123.86	142.826	93.3247	76.494	138.637	133.79	126.969	158.566
2552	2253	731	ENSGALT00000013828	ENSGALG00000008485	CCNYL1	101.24	83.3225	167.379	77.9474	95.5296	87.9125	81.0459	49.2563	113.324	89.3107	79.009	110.481
912	613	730.704	ENSGALT00000029777	ENSGALG00000013512		283.88	268.884	13.3625	286.369	250.021	179.179	298.552	237.533	221.174	367.531	404.325	272.792
1466	1167	730.354	ENSGALT00000031517	ENSGALG00000019837		156.627	108.179	245.242	150.352	149.17	159.03	131.238	112.476	160.635	94.9331	79.5636	149.277
4826	4527	730	ENSGALT00000018759	ENSGALG00000011505	MARK3	35.682	31.2643	64.7602	38.7398	35.2269	34.8048	24.1727	15.9258	44.7825	28.6241	23.3102	44.8006
4657	4358	730	ENSGALT00000037497	ENSGALG00000012104	ANLN	40.2795	33.4688	46.7803	40.2421	29.4912	29.866	19.8483	10.4162	32.8357	23.9991	21.5237	28.2101
926	627	729	ENSGALT00000001109	ENSGALG00000000764	SSR2	254.011	342.226	370.968	279.322	263.008	274.221	282.887	301.007	297.325	278.266	306.004	325.482
1322	1023	729	ENSGALT00000007403	ENSGALG00000004648	PDCD5	169.244	150.363	347.311	171.197	167.203	196.798	175.051	149.303	252.314	276.677	280.284	263.162
3465	3166	728	ENSGALT00000022432	ENSGALG00000013823	TNPO3	55.1077	45.5667	77.1296	55.2416	54.3998	55.6492	34.4293	25.4708	62.5706	28.057	18.3488	51.9747
1377	1078	728	ENSGALT00000001050	ENSGALG00000000734	RPA2	161.599	134.881	250.765	162.24	170.726	167.773	162.558	129.399	166.4	192.86	166.611	206.206
3873	3574	728	ENSGALT00000025998	ENSGALG00000016141		45.7893	37.8451	74.1838	48.9353	39.7945	51.5353	17.8458	9.5333	56.9126	15.5449	9.84194	51.5355
5974	5675	727.822	ENSGALT00000026472	ENSGALG00000016411	col14A1	26.9963	19.0357	29.8612	30.8109	16.5409	21.8735	7.52445	4.92606	32.7274	8.33656	6.56736	16.7594
2140	1841	727.558	ENSGALT00000006991	ENSGALG00000004384	SLC19A1	92.5641	98.0291	135.041	94.9423	84.5191	112.841	90.8117	82.7035	108.876	61.8758	49.9878	103.91
5105	4806	727	ENSGALT00000008479	ENSGALG00000022808	RRP1B	34.8872	23.0103	61.8289	36.3409	25.759	33.7862	17.1547	10.8231	40.4561	23.915	24.7293	37.8838
3475	3176	727	ENSGALT00000025051	ENSGALG00000015540	RAD23B	59.176	49.3637	3.16048	54.992	58.6174	48.1384	40.3657	25.9623	60.8849	58.4434	40.7772	67.203
1054	755	727	ENSGALT00000045941	ENSGALG00000025999	NDUFA4	267.835	315.551	254.667	231.33	211.534	164.701	246.935	254.644	146.847	442.149	441.895	206.306
2073	1774	727	ENSGALT00000002785	ENSGALG00000001803	IWS1	84.589	65.0315	5.95088	98.4524	76.0437	97.1597	46.5947	37.7504	104.597	71.5191	84.1193	95.752
3693	3394	727	ENSGALT00000041131	ENSGALG00000002910	GSPT1	52.2703	37.5444	88.1124	51.4598	46.1512	41.5829	36.8302	24.6724	50.0372	41.9318	42.7119	54.278
1714	1415	725.568	ENSGALT00000030602	ENSGALG00000019316	TOMM22	128.962	129.27	152.505	123.188	117.917	133.147	116.024	96.8077	128.899	160.421	134.268	131.394
997	698	724	ENSGALT00000014657	ENSGALG00000009008	EDF1	222.058	177.994	393.731	249.189	226.101	251.4	235.776	213.924	306.48	274.136	258.843	308.32
3013	2714	723.413	ENSGALT00000012189	ENSGALG00000007537	INCENP	37.7712	21.2862	40.889	64.0357	21.3611	47.9937	5.6254	3.90725	65.7258	6.44017	10.7672	21.3425
2163	1864	723.398	ENSGALT00000007959	ENSGALG00000004963	TIMM8A	81.5324	71.4198	172.859	93.2345	91.9365	125.438	105.949	89.0861	126.495	134.681	99.2664	148.406
1059	760	723	ENSGALT00000016353	ENSGALG00000010060	PSMA6	285.028	224.552	515.546	228.544	273.248	797.403	226.786	197.315	577.684	599.269	384.991	517.657
5560	5261	723	ENSGALT00000004392	ENSGALG00000002781	BRCA1	31.4897	24.2641	50.5933	33.0153	23.9803	32.3583	9.18372	5.82667	36.1502	18.2762	11.5486	30.4843
9354	9055	723	ENSGALT00000003682	ENSGALG00000002336		19.2826	13.8965	28.4202	19.1821	15.3155	16.6497	5.40646	1.99345	18.5525	6.92668	5.0029	15.6792
6642	6343	722.35	ENSGALT00000010550	ENSGALG00000006526	PLXNB1	19.3658	16.4589	22.5607	27.3589	13.5671	18.9014	4.60549	0.455062	17.1915	4.22466	2.85677	13.4881
4317	4018	722	ENSGALT00000005541	ENSGALG00000003503	MYBL2	42.2936	35.5081	67.7523	43.1691	39.6894	54.1063	31.4821	24.1104	56.5793	36.1329	36.0787	51.798
3417	3118	721	ENSGALT00000021997	ENSGALG00000013506	MED24	58.3089	51.8875	80.2596	55.5526	47.9632	46.8763	41.2876	32.7826	54.4974	27.1615	25.4684	50.0772
3088	2789	720	ENSGALT00000023900	ENSGALG00000014804	THBS4	55.6698	54.3369	1.11694	62.0197	57.2637	76.8062	42.3339	26.8841	105.28	42.7514	37.0719	73.1721
3294	2995	720	ENSGALT00000013489	ENSGALG00000008289	RBM19	53.8004	37.8357	91.7611	57.7539	51.0374	57.1714	32.9051	30.4913	75.0352	47.1459	46.9784	59.2286
3409	3110	720	ENSGALT00000017607	ENSGALG00000010829	CDCA7	58.9307	44.3386	92.6529	55.6183	54.4678	62.5258	30.7624	24.7961	72.1985	47.2453	38.3866	69.3002
2446	2147	718.972	ENSGALT00000002799	ENSGALG00000001811	EIF6	80.4359	59.4456	117.861	80.4499	65.6038	69.301	61.3131	47.1958	75.6472	71.0432	74.7181	81.7163
1444	1145	718	ENSGALT00000010676	ENSGALG00000006613	CTSD	142.125	145.073	222.035	150.648	102.962	129.321	42.0107	18.47	178.49	41.9874	22.3423	156.196
1709	1410	718	ENSGALT00000038786	ENSGALG00000023447		106.805	93.4391	127.159	122.335	112.766	130.127	81.2407	79.3112	123.729	94.0467	71.8168	116.973
2993	2694	717	ENSGALT00000003135	ENSGALG00000002014	SMU1	66.1986	52.79	2.37689	63.9392	55.4243	55.9888	38.9571	21.9644	70.453	52.9454	42.3358	56.9258
1743	1444	717	ENSGALT00000015738	ENSGALG00000009668	C4orf27	115.559	86.5116	218.486	119.288	122.709	207.979	103.628	79.0711	155.697	142.323	152.8	192.043
9736	9437	716.34	ENSGALT00000020190	ENSGALG00000012361	NIN	14.0913	8.37047	20.6818	18.236	10.6852	12.5868	4.97199	3.35852	15.4136	5.18886	2.94058	10.9243
6971	6672	716	ENSGALT00000005228	ENSGALG00000003299	WHSC1L1	23.7307	17.8367	38.6747	25.7812	19.3338	23.9231	4.90762	1.63287	31.3976	8.8996	5.43181	24.919
788	489	716	ENSGALT00000000190	ENSGALG00000000137	SNRPE	329.514	290.831	595.635	351.763	332.4	335.1	388.676	399.496	345.123	471.387	495.9	459.108
2608	2309	716	ENSGALT00000015547	ENSGALG00000009551	DYNC1I2	71.9796	45.6275	118.499	74.4963	54.4338	78.6346	25.7288	15.1262	104.558	37.85	32.5452	75.3189
926	627	715.027	ENSGALT00000039715	ENSGALG00000023740	HBZ	430.717	568.865	332.06	273.968	148.387	110.058	596.07	506.947	239.805	355.238	502.764	132.712
2806	2507	715	ENSGALT00000006190	ENSGALG00000003893	XPR1	57.6221	55.5477	83.8739	68.5168	56.6371	54.0638	29.7805	16.573	55.6168	31.3682	27.8489	66.1919
959	660	715	ENSGALT00000039281	ENSGALG00000002563	TPM4	278.699	298.568	319.643	260.26	284.938	261.475	231.736	200.995	270.617	316.452	396.487	260.244
5826	5527	714	ENSGALT00000019383	ENSGALG00000011878	TCF20	29.1295	20.585	48.722	31.0352	23.2536	26.7394	9.64871	4.61866	34.2358	10.5993	9.25706	25.493
2370	2071	714	ENSGALT00000038363	ENSGALG00000008418	GYLTL1B	57.2581	57.793	92.0052	82.8254	58.0656	81.4823	31.2091	15.7815	57.0287	22.8294	16.2126	68.0958
2582	2283	714	ENSGALT00000045586	ENSGALG00000027126	BLCAP	81.9723	83.9219	105.369	75.1342	73.5774	66.9678	84.279	77.1475	74.0915	59.5483	55.0931	77.7002
1482	1183	713	ENSGALT00000019533	ENSGALG00000011974	RPL7L1	161.463	135.989	296.387	144.794	155.773	164.016	150.744	132.992	177.895	175.069	163.536	230.456
4013	3714	713	ENSGALT00000013093	ENSGALG00000008064	CCDC104	52.8306	45.1539	103.493	46.1204	50.6988	48.8682	47.3839	43.9141	69.1866	63.5219	63.5702	57.8598
916	617	712	ENSGALT00000011154	ENSGALG00000006885	H-RAS	171.436	156.369	289.467	277.23	284.884	367.154	247.886	280.438	299.016	488.408	381.794	337.727
1159	860	712	ENSGALT00000010489	ENSGALG00000006489	CHCHD3	170.612	121.975	294.006	198.896	155.214	176.459	140.018	124.196	192.76	207.133	195.83	204.061
3865	3566	712	ENSGALT00000005847	ENSGALG00000003691		46.1582	50.0908	75.7091	47.9672	34.0536	50.4396	24.765	14.7963	60.4497	26.1151	24.2117	50.3477
7889	7590	711	ENSGALT00000016171	ENSGALG00000009946	HECTD1	23.4614	17.688	35.2967	22.5047	18.6763	17.9414	8.19248	5.31933	21.9682	12.9198	9.2688	18.3222
1369	1070	711	ENSGALT00000030630	ENSGALG00000011738	ARHGDIB	91.5013	95.6969	171.769	159.636	152.351	157.71	106.059	112.998	142.484	116.492	102.108	167.676
5073	4774	710	ENSGALT00000003177	ENSGALG00000002043	WDR33	28.3595	28.5505	1.30504	35.729	24.6449	29.711	14.9463	9.88888	40.1411	17.673	13.6197	32.9714
6953	6654	710	ENSGALT00000013720	ENSGALG00000008423	SLC4A8	14.396	14.0549	15.3213	25.6343	24.783	24.9918	10.0341	5.39341	17.6931	8.87582	9.29109	19.607
1649	1350	710	ENSGALT00000021505	ENSGALG00000013165	FH	131.411	109.559	159.731	126.348	109.552	99.297	90.3818	84.8932	100.995	106.835	85.6678	126.809
9372	9073	710	ENSGALT00000024971	ENSGALG00000015484	BCL9	17.9653	14.847	29.184	18.7998	19.6076	19.0362	9.13395	5.89785	19.2602	6.64976	6.40276	17.077
3925	3626	709	ENSGALT00000040662	ENSGALG00000004997	FLII	39.6557	31.4398	56.8923	46.9747	45.5439	45.7577	27.7378	19.7063	48.0066	19.5805	17.1969	43.044
1897	1598	708	ENSGALT00000011505	ENSGALG00000007103	PDHB	101.752	87.8573	184.218	106.439	100.238	113.223	76.7555	50.8645	129.763	87.1663	75.3743	144.29
3482	3183	708	ENSGALT00000045562	ENSGALG00000028565	PCDHGC3	46.7254	57.0474	71.2262	53.437	42.9015	45.0513	17.6924	9.56347	57.5983	12.8033	8.53935	54.4389
14637	14338	708	ENSGALT00000005344	ENSGALG00000003381	HERC1	14.9407	9.20468	21.5092	11.8629	8.4365	9.43331	4.18058	2.3093	13.1434	4.28564	2.49045	8.76405
2533	2234	708	ENSGALT00000006591	ENSGALG00000004144	DDX50	71.9068	46.9824	134.872	76.137	62.818	80.5137	44.5098	32.7024	97.4425	61.7808	61.0729	89.2998
4481	4182	708	ENSGALT00000001368	ENSGALG00000021694		40.5712	38.8493	68.4887	40.6719	35.7038	40.3853	30.0435	17.8015	44.1852	14.7695	15.5477	40.9203
4117	3818	707	ENSGALT00000006521	ENSGALG00000004098	STK4	39.4084	31.8851	69.1256	44.4866	36.4469	42.7147	23.9126	15.694	51.4305	25.684	18.2863	47.4221
3166	2867	707	ENSGALT00000043730	ENSGALG00000029174		37.2666	30.1596	48.2308	59.243	50.4318	47.1764	37.0155	26.6743	35.3726	40.6444	42.9414	50.0277
10893	10594	706	ENSGALT00000001009	ENSGALG00000000713	ZFHX3	13.3463	7.81827	17.7735	16.01	10.0131	9.53189	2.90955	0.998119	13.3253	2.99027	3.67244	8.50052
2312	2013	705.766	ENSGALT00000014752	ENSGALG00000009064	FZD1	80.1281	76.5991	107.123	84.2291	67.4648	53.1126	23.375	10.9177	72.6751	15.8112	10.8506	60.2032
6323	6024	705	ENSGALT00000011890	ENSGALG00000007352	SPAG9	23.1941	18.8111	30.7687	28.1157	20.6684	20.9177	8.88807	3.91845	24.4274	12.5788	8.49333	20.4188
924	625	705	ENSGALT00000004816	ENSGALG00000003046	PSMA4	265.921	200.241	374.924	270.991	263.85	208.137	173.211	148.507	222.936	331.116	383.728	243.349
2638	2339	704.432	ENSGALT00000025152	ENSGALG00000015599	SOHO-1	52.5688	39.7739	74.0364	72.3527	64.4689	59.425	54.6671	57.0221	31.5409	34.6414	33.7228	43.1387
7700	7401	704	ENSGALT00000021209	ENSGALG00000012992	WNK1	25.2321	17.7708	40.1733	22.8522	16.2802	18.3039	7.40732	3.1461	28.0833	5.20526	4.03264	20.764
1298	999	702	ENSGALT00000032738	ENSGALG00000005127	TALDO1	169.705	145.092	300.046	168.817	166.49	188.341	168.686	146.368	239.347	222.453	213.396	247.518
4866	4567	702	ENSGALT00000013899	ENSGALG00000008527	PPP2R5D	35.8076	29.6453	70.2182	36.9276	31.711	41.0123	22.1394	16.6516	49.6934	20.7049	16.6877	44.7959
1803	1504	702	ENSGALT00000037114	ENSGALG00000014118	MRPS26	92.1474	80.791	123.469	112.133	91.266	93.0376	80.9854	69.7382	90.2049	75.7849	72.998	104.868
2208	1909	702	ENSGALT00000014614	ENSGALG00000008984		73.3666	46.9634	117.219	88.3439	66.2108	78.7152	23.4656	10.2948	99.0701	38.3592	38.8061	79.1749
2362	2063	700	ENSGALT00000004485	ENSGALG00000002844	RCN2	74.9375	90.0037	146.806	81.5163	84.4013	84.6816	66.3826	48.0458	88.8215	107.876	93.0025	119.829
951	652	700	ENSGALT00000004080	ENSGALG00000002591	POLR2E	215.629	182.874	263.576	257.926	233.356	239.377	234.252	259.159	186.621	241.227	218.25	249.082
7784	7485	700	ENSGALT00000003754	ENSGALG00000002375	NOTCH1	20.3512	21.7666	37.4797	22.4673	16.2554	19.7731	4.83055	1.95495	26.1696	9.69819	3.70257	21.3421
1583	1284	700	ENSGALT00000040792	ENSGALG00000004693	ARPC1A	142.529	120.507	214.981	130.972	133.951	169.479	109.398	79.6907	159.468	144.437	145.691	175.684
2694	2395	699	ENSGALT00000002199	ENSGALG00000001446	GSN	70.0633	78.0972	103.693	70.116	56.9182	74.5987	54.8648	39.6464	94.5987	51.2467	40.2777	80.4039
3986	3687	699	ENSGALT00000000832	ENSGALG00000000596	CDC27	45.2946	36.042	70.4082	45.5459	39.4079	35.4166	27.7707	17.4104	46.2179	29.8779	28.4764	42.9493
1325	1026	698	ENSGALT00000003712	ENSGALG00000002352	OAZ2	149.508	125.971	202.413	163.438	148.293	117.954	167.158	141.579	124.142	162.139	158.952	172.34
3349	3050	698	ENSGALT00000003599	ENSGALG00000002288	LIG3	57.1161	41.7043	81.4249	54.9795	46.7862	50.336	33.186	25.6341	60.5212	44.469	42.1123	54.6771
1540	1241	697	ENSGALT00000023361	ENSGALG00000014468	MLF2	142.309	142.285	175.155	134.929	127.361	92.3264	139.058	117.997	116.086	110.446	131.414	135.858
1227	928	697	ENSGALT00000024525	ENSGALG00000015200	DAZAP1	178.09	128.24	231.808	180.439	145.368	146.054	120.334	100.824	180.715	117.163	124.624	166.892
4587	4288	696.714	ENSGALT00000006272	ENSGALG00000003937	GEMIN5	44.2505	28.6888	52.4894	39.0342	31.6331	31.483	18.6301	13.4009	38.2446	27.2111	21.7508	29.6227
6043	5744	696.181	ENSGALT00000013259	ENSGALG00000008167	KMT2E	28.1851	25.3526	35.6381	29.1175	30.6646	22.9318	9.28348	5.07673	24.0209	9.07383	6.49685	22.6738
6916	6617	695.804	ENSGALT00000022916	ENSGALG00000014168	NOL6	25.232	18.8005	2.5967	25.2622	18.6755	27.7181	17.1674	13.1267	30.1508	13.8207	11.4273	27.887
1854	1555	695	ENSGALT00000044163	ENSGALG00000027238	PAF1	88.9536	75.2146	48.6358	107.374	115.621	105.242	66.6005	49.5923	101.705	61.6288	47.2977	105.048
6719	6420	694	ENSGALT00000006037	ENSGALG00000003805	PRKG1	17.2032	15.2052	29.1943	25.9699	22.9631	31.006	10.865	8.2519	23.1461	10.1912	7.55436	23.8383
4688	4389	694	ENSGALT00000014039	ENSGALG00000008616	GTF2H4	34.3118	38.6242	36.4738	37.9874	31.1131	29.284	18.5416	12.5085	28.8004	14.9071	12.993	24.2501
1271	972	694	ENSGALT00000004991	ENSGALG00000003153	COPE	172.361	159.423	219.534	171.529	162.608	141.628	152.194	164.828	146.128	192.273	187.522	198.96
4246	3947	693	ENSGALT00000033880	ENSGALG00000006648	SPECC1L	40.9591	19.4858	62.3063	42.1805	17.3585	31.1819	7.78241	2.38135	55.6902	13.5516	8.50677	28.4879
2763	2464	693	ENSGALT00000002236	ENSGALG00000001474	RAB14	67.7764	66.306	123.125	67.5675	61.6526	59.0596	56.4017	41.8306	71.2335	70.0981	63.5914	88.47
771	472	692	ENSGALT00000043654	ENSGALG00000026714	SHISA2	196.125	118.112	304.694	352.216	295.319	413.182	101.686	61.5508	347.331	93.7606	41.7783	321.964
1154	855	692	ENSGALT00000044751	ENSGALG00000026517	RFC5	170.986	160.214	328.517	194.44	211.939	237.455	231.651	224.986	235.87	184.512	223.779	261.69
7689	7390	692	ENSGALT00000024188	ENSGALG00000014999	MAP1B	13.5914	9.48365	0.374697	22.4961	16.4643	12.553	6.78332	4.89962	15.8905	14.605	44.0644	10.7483
4811	4512	692	ENSGALT00000002498	ENSGALG00000001636	EDC4	36.3623	24.56	57.0357	36.8453	31.574	30.1179	15.2232	8.97175	43.5627	15.5592	10.6308	32.9237
3743	3444	691	ENSGALT00000030973	ENSGALG00000013628	C6orf62	51.9375	41.2939	55.6275	48.2015	49.6657	43.9606	35.4903	20.8097	41.662	39.0581	33.4258	41.6829
10445	10146	691	ENSGALT00000001808	ENSGALG00000001192	ARHGAP32	17.7876	15.3662	32.6135	16.3617	14.4603	15.0417	7.78954	5.02147	21.2338	8.17448	5.77816	17.6353
4844	4545	690	ENSGALT00000008191	ENSGALG00000005108	CUL3	40.9994	33.2433	2.09428	36.4721	37.2186	38.4375	23.7485	17.3902	46.7706	39.8589	32.9506	50.2863
3510	3211	690	ENSGALT00000009586	ENSGALG00000005962	ARHGAP17	53.6707	40.6763	94.5893	51.6243	39.5843	51.3187	35.6076	27.6419	63.8874	28.2091	21.7432	60.4044
3990	3691	689	ENSGALT00000027475	ENSGALG00000017009	KPNA3	48.7509	37.1743	91.9003	44.8457	46.022	47.1198	28.0585	19.7933	67.4478	36.013	38.1199	55.2048
3390	3091	688	ENSGALT00000012101	ENSGALG00000007485	TFRC	52.9925	56.316	2.51952	53.473	36.0765	55.3958	11.2143	2.59161	72.7672	16.3259	11.3798	60.0284
1997	1698	686.526	ENSGALT00000011138	ENSGALG00000006876	CTSA	89.9023	119.805	133.801	97.1326	88.33	114.044	94.385	76.6557	97.9358	61.2605	57.6488	100.008
3639	3340	686	ENSGALT00000005132	ENSGALG00000003246	TXLNA	39.9364	36.5845	58.9141	49.3427	47.9583	44.7358	32.6038	23.952	48.8817	31.7905	28.5626	40.5951
7690	7391	686	ENSGALT00000023102	ENSGALG00000014286	PDS5A	21.9996	16.3479	35.7085	22.298	18.348	18.4053	8.83155	6.32963	22.1941	15.3784	10.3837	19.9365
1503	1204	686	ENSGALT00000015410	ENSGALG00000009464	GOLIM4	102.256	82.7784	3.59351	136.881	88.3013	125.395	19.4888	11.5325	129.351	43.632	28.3299	111.091
5357	5058	686	ENSGALT00000023830	ENSGALG00000014770	EPB41L3	41.7199	37.6094	58.9538	32.583	36.7601	29.9189	18.7672	13.7048	39.2036	18.0026	19.9147	37.0966
779	480	686	ENSGALT00000005077	ENSGALG00000003205	EIF4EBP1	356.256	322.831	455.733	343.343	333.71	261.569	425.516	321.317	282.24	391.012	498.536	337.283
5775	5476	684.48	ENSGALT00000009290	ENSGALG00000013809		27.2119	20.766	1.03227	30.0291	26.1351	27.7211	17.8346	12.9281	32.6809	12.4526	12.6992	22.106
2626	2327	684	ENSGALT00000042638	ENSGALG00000006403	MESDC2	59.9585	75.099	114.161	70.6163	67.4144	67.071	39.4177	31.9004	76.6713	52.7443	42.1399	83.7862
3414	3115	683.487	ENSGALT00000032015	ENSGALG00000015961	SUCLG1	58.5932	48.7399	88.0541	52.713	48.0712	48.0563	45.1798	34.7522	57.6541	46.6949	44.1421	62.7919
706	407	683	ENSGALT00000004378	ENSGALG00000002773	SNRPC	370.011	321.472	505.583	403.155	370.926	382.083	396.229	391.282	365.817	559.318	510.695	467.234
2745	2446	683	ENSGALT00000020962	ENSGALG00000012852	MKRN1	68.9841	62.0496	112.357	67.0826	66.6459	61.0865	54.0261	36.6364	73.7696	53.2371	48.3713	77.6933
1403	1104	682	ENSGALT00000011817	ENSGALG00000007299	THOC7	152.961	132.117	244.389	148.409	175.479	150.48	159.309	117.935	155.664	256.81	274.685	210.458
2019	1720	682	ENSGALT00000021374	ENSGALG00000013092	STRAP	93.9141	73.8202	230.416	95.258	96.6997	118.737	75.962	56.3851	142.831	122.262	104.112	170.161
11556	11257	682	ENSGALT00000004648	ENSGALG00000002942	JMJD1C	11.636	8.02485	23.9524	14.5548	11.3961	13.9716	4.22572	2.23922	16.2178	6.87276	4.11896	15.8424
7541	7242	681.949	ENSGALT00000016462	ENSGALG00000010120	KIF2C	22.7825	14.987	39.4299	22.6224	18.7876	22.1273	12.5175	11.7546	26.2349	21.2562	14.6449	29.3494
1957	1658	681	ENSGALT00000002304	ENSGALG00000001515		82.623	63.5427	138.513	98.6752	71.3895	90.3754	57.0595	45.4163	108.19	65.1933	52.0741	98.9039
1194	895	680.12	ENSGALT00000000074	ENSGALG00000000059	TUBB3	133.73	113.974	121.768	182.561	193.189	120.734	175.894	176.459	126.558	155.787	150.89	141.028
4177	3878	680	ENSGALT00000022069	ENSGALG00000013559	AKAP8L	33.1577	26.8737	22.6705	42.1256	37.0405	43.6425	20.6548	17.1037	44.3645	26.6002	25.837	33.887
1966	1667	679	ENSGALT00000023326	ENSGALG00000014445	NOP2	100.261	61.0157	132.678	97.8542	80.9248	84.4076	64.1093	50.361	95.103	57.4882	56.5886	101.291
3193	2894	679	ENSGALT00000005221	ENSGALG00000003297	HDAC1	61.762	49.4563	70.2061	56.3659	54.288	55.5942	44.0779	31.4078	55.2813	36.1397	30.9387	50.0417
7939	7640	678	ENSGALT00000002195	ENSGALG00000001443	PTPRU	25.9617	34.4893	35.3602	21.3197	14.8432	19.1958	15.2726	10.9325	26.5859	15.1689	9.6267	20.28
1006	707	678	ENSGALT00000036237	ENSGALG00000006910	IMPDH2	221.306	152.877	269.998	230.386	156.389	201.124	149.953	98.6509	238.706	140.727	127.397	225.322
2944	2645	678	ENSGALT00000012259	ENSGALG00000007581	FYTTD1	65.6095	51.5312	3.99125	61.5814	64.0434	62.6483	44.5176	28.6708	78.9084	55.3105	48.9635	83.97
2430	2131	677	ENSGALT00000013978	ENSGALG00000008584	NUSAP1	71.1692	54.8844	92.9068	76.3222	65.2999	54.3982	42.5426	40.5483	56.9626	80.2303	68.7766	64.6353
1598	1299	676	ENSGALT00000009279	ENSGALG00000005777	STK25	100.939	77.9507	7.99369	125.021	97.4847	124.02	41.9566	20.7204	165.649	59.4361	55.3881	136.656
745	446	676	ENSGALT00000039081	ENSGALG00000017370	ARPP19	324.796	229.077	444.299	364.131	233.077	301.198	129.375	113.754	336.641	161.689	120.692	317.479
2573	2274	675	ENSGALT00000001485	ENSGALG00000001005	STT3A	79.4811	86.4555	100.992	71.3114	68.7778	61.8455	64.0222	54.6256	77.9491	36.0524	34.6867	69.5534
3079	2780	675	ENSGALT00000028102	ENSGALG00000017414	JUP	62.0396	55.0858	86.2204	58.3317	56.9391	57.772	45.6553	36.4226	70.4949	46.3829	28.7566	60.3287
2725	2426	674.5	ENSGALT00000004585	ENSGALG00000002906	TARDBP	74.5172	85.9768	128.536	66.7939	65.3797	64.6184	57.461	42.794	68.2887	64.8937	60.1937	81.602
2156	1857	674	ENSGALT00000007523	ENSGALG00000004725		89.7151	79.6473	135.878	87.1954	75.4438	70.6615	75.2399	58.6097	105.534	66.0937	80.0726	88.0667
5825	5526	673	ENSGALT00000025788	ENSGALG00000016006	ITSN1	23.5347	16.1003	38.4585	29.2583	19.1962	25.5525	6.3886	2.60934	32.4435	12.5601	15.1419	21.7554
3888	3589	672.573	ENSGALT00000007216	ENSGALG00000004531	PLOD1	40.1474	43.2188	46.9233	45.0206	40.5942	41.231	25.4042	17.4691	43.8137	23.9193	21.9776	41.5117
2075	1776	672	ENSGALT00000017577	ENSGALG00000010811	LGMN	77.8845	90.4547	122.197	90.9016	80.2149	76.3563	58.1928	43.8421	83.8331	88.2898	72.6213	92.8311
2999	2700	672	ENSGALT00000006770	ENSGALG00000004256	DHRS3	43.9685	50.5658	90.3134	59.7931	59.5012	68.0864	29.7059	20.0563	51.2124	31.7792	28.8191	74.5535
1040	741	672	ENSGALT00000015018	ENSGALG00000009229	ATP6V0C	234.373	291.112	378.123	217.87	223.82	154.721	259.805	173.258	187.125	242.116	262.522	285.649
2935	2636	671	ENSGALT00000009287	ENSGALG00000005782	GCLM	63.4046	52.1388	154.877	61.1537	63.7243	70.5723	54.34	38.4933	85.9498	75.9718	69.5512	100.835
1179	880	670	ENSGALT00000025884	ENSGALG00000016067	HMGN1	176.738	144.802	300.304	182.91	180.681	155.469	153.562	122.952	197.151	278.222	224.689	227.594
1863	1564	669	ENSGALT00000042820	ENSGALG00000026456	UBE2Q1	87.4183	75.3637	70.9294	102.763	85.1968	89.1061	84.2207	55.9312	115.248	94.7612	87.2358	99.066
6331	6032	669	ENSGALT00000001793	ENSGALG00000001182	NCOA6	23.1084	16.8245	36.8104	26.6447	18.4085	22.6459	7.79769	5.06421	27.3864	10.5036	6.36155	23.149
4751	4452	669	ENSGALT00000015995	ENSGALG00000009838	AQR	35.7438	20.5466	64.7627	36.1008	27.1704	30.667	13.6316	7.84512	44.5616	27.2469	19.9918	33.3675
3169	2870	668	ENSGALT00000008145	ENSGALG00000005079	VCL	47.2201	31.0002	67.5369	55.9165	37.2904	42.8339	11.7062	2.71674	61.6273	12.9793	9.28495	42.9242
7212	6913	668	ENSGALT00000010817	ENSGALG00000006694	UPF2	22.1509	16.6553	39.229	23.2143	20.5736	19.5653	12.0959	8.08057	27.2881	15.6128	23.7452	23.4465
1712	1413	668	ENSGALT00000015187	ENSGALG00000009325	OLA1	111.77	85.833	187.761	113.574	108.012	102.888	93.4474	78.2358	115.067	117.731	118.812	146.308
1038	739	668	ENSGALT00000027520	ENSGALG00000017033	MRPS31	222.553	164.424	277.979	217.159	193.416	192.127	165.686	143.231	200.035	265.605	287.032	214.624
540	241	668	ENSGALT00000011661	ENSGALG00000007205	COX6A1	756.601	794.995	651.321	665.894	633.281	404.316	856.795	843.834	438.019	883.805	933.226	519.307
4046	3747	667	ENSGALT00000003255	ENSGALG00000002087	NCBP1	49.3395	38.8656	2.40173	42.7649	39.8487	37.5142	27.0983	17.2741	48.671	33.9029	30.8651	41.0464
2759	2460	666	ENSGALT00000019660	ENSGALG00000012043	PDCD6IP	64.3622	43.5667	125.506	65.0406	44.754	59.9329	26.6209	16.6292	83.3913	34.6854	23.6147	70.9271
3929	3630	665.701	ENSGALT00000039784	ENSGALG00000008537	EPHB3	38.876	37.4827	1.04887	44.0573	37.7487	38.8794	19.7995	11.5636	45.8163	16.7084	10.5575	39.1108
5986	5687	665	ENSGALT00000006310	ENSGALG00000003959	AP1M1	32.7195	26.3677	53.6201	28.0921	28.3739	26.809	26.5564	20.2837	31.4232	32.2188	24.7407	36.7077
796	497	663	ENSGALT00000002423	ENSGALG00000001597	PSMB3	339.239	288.897	649.074	320.481	326.098	407.786	464.826	407.464	373.155	580.389	603.731	548.042
3625	3326	663	ENSGALT00000021621	ENSGALG00000013243	PRCC	46.6816	37.8331	73.2111	47.8891	44.1824	35.3644	37.5512	24.7272	51.4664	35.9926	30.9262	42.4772
2125	1826	661	ENSGALT00000034558	ENSGALG00000004237	PRKAR1A	90.2155	65.7965	159.794	86.9653	72.9725	90.5535	25.1747	10.7628	120.166	41.8464	26.2684	112.212
3279	2980	661	ENSGALT00000038026	ENSGALG00000008149	EWSR1	51.6988	45.2038	67.7735	53.2881	51.3736	58.6236	34.6098	24.8743	59.3524	37.2335	33.265	52.2053
4044	3745	660	ENSGALT00000004175	ENSGALG00000002649	UBE4B	41.4231	29.104	68.5321	42.3387	35.8956	44.6251	14.838	5.67556	42.7452	20.021	15.3696	42.8921
4389	4090	659	ENSGALT00000019131	ENSGALG00000011704	PTPLB	35.4504	37.7204	57.039	38.7086	32.9255	35.7706	21.879	15.7471	31.0474	27.2453	23.9765	40.5729
1545	1246	659	ENSGALT00000001768	ENSGALG00000001168	POLR2C	113.904	100.259	188.897	127.061	124.005	123.953	142.78	121.81	154.031	125.717	121.049	157.847
624	325	659	ENSGALT00000017388	ENSGALG00000010689	MAGOH2	555.713	462.794	26.0926	487.133	421.624	556.489	552.975	515.64	579.844	981.594	824.852	749.546
1944	1645	659	ENSGALT00000039554	ENSGALG00000003941	FUBP3	84.6544	58.2352	126.457	96.2421	69.6557	83.1688	32.3537	22.5954	95.671	42.1928	52.4857	87.9216
11755	11456	659	ENSGALT00000026250	ENSGALG00000016281	DMD	12.6099	8.38202	18.8231	13.8197	11.0745	11.6643	9.08669	5.90171	14.2094	8.43477	12.0027	13.6793
2286	1987	659	ENSGALT00000024624	ENSGALG00000015258	DCBLD2	104.924	89.2091	203.199	79.677	52.9106	79.3673	22.5445	6.2892	133.156	32.9277	24.4082	93.9219
3027	2728	658.481	ENSGALT00000009889	ENSGALG00000006127	FAM122A	67.7993	63.1907	104.679	57.9889	65.4067	51.3098	43.462	29.2372	57.6415	47.5976	35.5565	69.6837
2052	1753	658	ENSGALT00000025223	ENSGALG00000015644	STAU2	87.1242	62.176	138.806	90.1757	76.8199	95.9403	34.9236	22.2391	108.547	48.4927	62.6292	91.5959
1700	1401	658	ENSGALT00000004426	ENSGALG00000002797	PGD	115.203	100.861	163.305	112.832	93.4227	83.2482	104.525	77.9148	90.7757	104.309	115.265	110.186
780	481	658	ENSGALT00000001798	ENSGALG00000021473	FAM192A	236.548	176.928	395.779	328.644	263.761	325.215	180.053	143.226	309.538	248.88	219.387	313.704
5631	5332	658	ENSGALT00000038956	ENSGALG00000002719	CSNK1D	34.0724	29.0194	56.5734	29.647	27.1613	31.436	18.4429	13.4613	33.8049	19.3166	14.0936	36.1866
14698	14399	657	ENSGALT00000018367	ENSGALG00000011256	WDFY3	10.6903	7.96467	17.596	10.9617	8.84377	8.82286	4.5036	2.72975	11.6134	4.24538	3.44225	9.68438
3697	3398	657	ENSGALT00000023902	ENSGALG00000014805	NAA50	47.6945	37.0984	72.271	46.4502	42.829	40.3669	27.496	14.8677	45.6904	33.2623	28.8593	40.7769
2532	2233	657	ENSGALT00000002422	ENSGALG00000001596	MLLT1	54.2391	33.0161	72.9299	70.6842	50.0442	57.907	13.1351	3.73089	55.1816	20.2464	16.7071	53.5831
1990	1691	656	ENSGALT00000001110	ENSGALG00000012833	VPS33B	81.1684	68.6271	127.827	93.1978	85.0853	85.7223	69.5067	48.7619	94.2668	65.3331	69.0227	104.566
3771	3472	655	ENSGALT00000005241	ENSGALG00000003308	ERLIN1	49.4056	45.0242	89.2732	45.3218	39.9429	51.6828	30.6884	22.5492	63.6148	27.189	19.4947	58.5412
7171	6872	654	ENSGALT00000008407	ENSGALG00000005232	USP54	13.9172	9.40382	28.3822	22.8634	15.8145	24.2058	8.08618	4.83375	22.7611	9.54402	7.60036	21.3869
7356	7057	654	ENSGALT00000009103	ENSGALG00000005676	TTC28	17.5972	11.7368	25.897	22.264	11.1147	16.0553	2.47863	0.560001	20.7423	2.36857	1.43491	16.5786
4076	3777	654	ENSGALT00000020182	ENSGALG00000012356	TAB2	37.6819	30.725	69.3719	41.5984	37.2178	44.3408	19.8799	14.4787	43.7115	25.162	22.4358	44.0691
8058	7759	654	ENSGALT00000004933	ENSGALG00000003120	NCOR2	20.8015	13.6076	25.1376	20.2496	16.8688	12.5583	4.74244	2.32642	18.6294	4.43165	6.52543	9.57696
5942	5643	653	ENSGALT00000016049	ENSGALG00000009871	RCOR3	25.5523	23.7909	51.002	27.8002	26.2087	27.1686	13.6274	8.91493	27.8037	17.8289	15.3002	30.9534
2989	2690	653	ENSGALT00000025659	ENSGALG00000015920	OTUD6B	59.355	42.5486	131.502	58.3185	53.9259	57.1514	35.4862	23.2279	76.2612	47.047	44.38	81.1547
2706	2407	653	ENSGALT00000000614	ENSGALG00000000453	NUP160	58.7969	43.3916	93.9733	65.1752	43.1874	57.4573	26.3208	11.7148	63.7803	19.7087	12.8423	61.1649
1369	1070	653	ENSGALT00000043519	ENSGALG00000028356	LMAN2	136.379	180.336	197.648	146.614	121.881	138.451	141.246	111.301	148.526	144.015	103.105	156.565
3879	3580	652.7	ENSGALT00000045583	ENSGALG00000026802		35.9132	32.2949	41.7819	43.8002	38.7191	26.6977	35.442	29.0622	28.5236	36.5889	33.9521	32.256
4989	4690	652	ENSGALT00000000103	ENSGALG00000000075	SCRIB	25.9665	19.3584	36.8267	33.398	20.8045	24.5207	4.57101	2.36847	33.6591	5.2611	3.29546	23.8939
998	699	652	ENSGALT00000012869	ENSGALG00000007926	ATP5H	248.647	246.101	302.799	224.087	244.705	155.912	306.848	276.725	160.268	361.424	378.94	234.958
3317	3018	651.411	ENSGALT00000045084	ENSGALG00000028906	FEM1B	49.9167	38.0177	78.7525	51.8539	41.3192	49.3205	31.5256	21.0888	58.419	31.5923	28.8754	61.6136
2578	2279	651	ENSGALT00000039716	ENSGALG00000002805	LMAN1	64.8501	67.0956	3.03753	68.625	57.8457	51.7356	37.6271	27.745	68.1246	50.5023	47.2388	58.9116
3176	2877	651	ENSGALT00000022629	ENSGALG00000006523	IGF2BP2	50.907	44.9239	1.56401	54.3609	47.8751	47.2832	31.8451	21.7553	48.0617	30.654	22.6002	44.5783
6807	6508	651	ENSGALT00000007198	ENSGALG00000004522	CASC5	24.3287	18.1463	43.7179	24.0314	17.2799	21.7404	11.5212	6.43348	27.1329	17.147	11.8744	24.3905
6368	6069	651	ENSGALT00000022247	ENSGALG00000013683	ARID1B	23.4511	17.1719	31.5386	25.7697	26.3154	15.5653	6.99447	3.7486	19.6514	9.25923	5.4446	16.5369
1753	1454	651	ENSGALT00000004384	ENSGALG00000002777	ACAA2	110.361	107.983	3.57077	107.563	95.2169	123.657	107.097	92.264	167.966	113.864	105.931	151.186
10937	10638	650	ENSGALT00000011022	ENSGALG00000006818	KMT2A	11.9495	8.74848	16.5124	14.6791	8.10613	9.70548	1.21315	0.351411	13.6058	2.03515	2.20437	9.4938
6818	6519	649.287	ENSGALT00000005121	ENSGALG00000003235		19.9182	15.5579	2.24174	23.9277	18.7922	21.0215	9.32008	5.25504	25.965	13.8158	10.825	22.5469
3296	2997	648.999	ENSGALT00000005046	ENSGALG00000003180	TSR1	47.5299	39.2678	58.0881	52.0239	41.6553	39.238	39.5859	27.8178	45.2624	31.1304	33.3752	41.7609
9420	9121	648.446	ENSGALT00000044494	ENSGALG00000025779		11.3094	10.9318	22.9296	17.0796	12.8396	9.6588	3.56395	1.98957	9.80263	3.51922	0.672213	9.21211
4451	4152	648	ENSGALT00000023839	ENSGALG00000014775	SREK1	33.379	29.2653	2.33419	37.4941	35.1082	29.0454	15.3871	13.171	42.9474	26.4934	63.6672	32.0924
6614	6315	648	ENSGALT00000009025	ENSGALG00000005624	MED12	26.0438	18.0884	33.1328	24.6517	22.896	21.732	11.6537	8.00009	25.6243	10.3858	8.18634	22.2318
5275	4976	648	ENSGALT00000016025	ENSGALG00000009856	GNS	35.5182	41.8418	63.751	31.2853	29.8167	31.4508	17.2974	11.5695	38.2983	25.4334	23.0276	35.6109
1514	1215	648	ENSGALT00000045264	ENSGALG00000027963	COX7C	127.13	146.266	7.26439	128.128	129.114	126.999	180.219	162.631	153.832	332.138	372.411	158.283
2689	2390	648	ENSGALT00000040562	ENSGALG00000024039		54.3596	42.1769	85.3731	65.1362	52.4901	60.5327	46.7683	36.5563	62.9824	34.1694	32.1112	60.2505
1022	723	647	ENSGALT00000002156	ENSGALG00000001415	UBE2L3	247.034	180.652	389.213	214.987	199.657	208.622	158.436	153.787	263.986	223.263	227.041	278.066
6974	6675	647	ENSGALT00000023829	ENSGALG00000001026	EPB41L1	22.0014	20.3513	36.0127	23.2862	19.9268	25.3021	16.9692	12.081	35.3877	13.3553	10.3797	24.832
1985	1686	647	ENSGALT00000001304	ENSGALG00000000889	CSNK2A2	91.694	72.3397	146.991	92.1918	80.4332	93.9147	64.9683	44.2186	118.412	57.3124	45.8355	111.477
6813	6514	647	ENSGALT00000020542	ENSGALG00000012579	BAZ2B	16.996	12.5405	37.5404	23.8617	16.6836	19.7853	4.35534	1.80365	27.9226	5.98737	6.62718	22.7371
2622	2323	646	ENSGALT00000027865	ENSGALG00000017237	TYR	62.1288	78.6567	102.065	66.808	46.4781	69.0765	67.9059	55.5424	74.9757	70.1727	58.2742	69.1208
3059	2760	646	ENSGALT00000015972	ENSGALG00000015995	PTPA	44.6075	43.8809	68.7463	56.2301	46.2238	56.8229	34.2384	23.9933	60.9434	37.1445	30.3167	51.3726
1828	1529	646	ENSGALT00000005175	ENSGALG00000003272	KHDRBS1	102.156	83.1905	199.436	101.501	101.362	118.934	54.8979	35.4167	136.945	86.4148	72.153	150.47
910	611	646	ENSGALT00000039377	ENSGALG00000020927	ARPC5	305.853	252.498	357.173	254.002	260.228	187.524	215.059	187.921	196.775	185.505	159.625	251.306
2776	2477	645.243	ENSGALT00000002040	ENSGALG00000001334	GNB1	44.7338	52.6822	143.18	62.581	72.584	46.828	36.7295	26.6626	88.3063	80.9393	51.025	79.4142
5446	5147	645	ENSGALT00000005363	ENSGALG00000003392	SBNO1	31.5652	21.6626	58.2706	30.1059	23.4098	29.6354	12.5576	8.50818	39.6505	17.8769	15.0143	33.6414
3746	3447	645	ENSGALT00000007530	ENSGALG00000004728	RGL1	50.1896	38.2874	82.0883	44.9535	40.3011	46.1411	25.4343	15.8648	55.8183	29.1411	21.0276	46.8937
507	208	644	ENSGALT00000046192	ENSGALG00000026108	ATP5D	587.418	627.94	144.774	743.82	674.69	514.083	731.727	639.826	501.945	785.238	696.943	501.972
2354	2055	643.911	ENSGALT00000044354	ENSGALG00000004690	MAPK6	85.5955	32.6829	103.71	75.2766	49.3372	75.25	0	0	87.7003	1.28187	0	76.4995
2200	1901	643	ENSGALT00000024064	ENSGALG00000014920	USP14	87.2878	74.2128	142.839	81.2595	70.4664	73.2353	66.6535	45.6789	97.812	78.1298	85.2281	95.7091
1263	964	643	ENSGALT00000003212	ENSGALG00000002064	STOML2	148.608	138.794	5.20626	160.243	158.32	163.813	181.007	170.517	178.471	139.209	152.036	194.642
1502	1203	643	ENSGALT00000031499	ENSGALG00000000235	PPP2R2A	148.578	94.3853	269.881	128.408	130.402	182.303	71.6268	40.2198	198.268	113.14	100.566	203.863
2340	2041	642	ENSGALT00000002637	ENSGALG00000001719	NUP88	77.3791	59.0884	112.436	75.5679	66.2116	74.6306	57.9009	47.0461	75.5013	75.1105	77.8153	76.1923
2382	2083	642	ENSGALT00000017469	ENSGALG00000010735	NDC1	78.5084	81.7112	6.72978	74.0442	59.3189	68.1963	67.3838	56.6092	82.8268	66.4122	54.754	107.172
3040	2741	642	ENSGALT00000043529	ENSGALG00000028110	CCDC124	43.9434	34.7836	37.757	56.2693	43.0965	50.1459	35.4485	30.0047	55.7268	29.3292	28.5825	49.0743
5079	4780	641	ENSGALT00000021199	ENSGALG00000012986	KDM5A	29.9703	18.4703	45.402	32.2163	20.2645	24.6368	6.58238	1.43008	34.7816	10.2575	5.68635	24.5421
2438	2139	641	ENSGALT00000012477	ENSGALG00000007700	CTTN	63.1704	45.105	95.553	71.9934	56.4405	64.0935	16.6542	10.3863	82.7334	34.9788	18.4379	65.9901
1677	1378	639.524	ENSGALT00000012315	ENSGALG00000007616	MGRN1	106.336	100.067	190.25	111.494	120.647	142.095	92.5604	69.7526	138.602	87.9955	102.847	141.205
984	685	639	ENSGALT00000019041	ENSGALG00000011652	TSN	213.225	177.718	347.39	224.107	195.212	242.318	139.666	105.405	288.632	151.057	123.708	270.596
6104	5805	639	ENSGALT00000000884	ENSGALG00000000623	PIK3C2B	22.7253	20.8535	31.6016	26.445	23.9714	23.0435	12.6776	8.86854	27.4766	10.8321	8.99737	23.8255
2868	2569	638	ENSGALT00000006336	ENSGALG00000003977	TWF2	45.7432	39.7696	71.0038	59.6626	52.8792	69.1877	38.5692	25.4861	65.9558	33.8334	24.4799	60.3357
2546	2247	638	ENSGALT00000001308	ENSGALG00000000890	SRPK1	64.8238	42.1269	85.877	68.2124	50.5735	91.3933	17.8473	7.89064	74.7632	30.1095	28.9366	61.6363
1557	1258	637.427	ENSGALT00000033617	ENSGALG00000008146	MORF4L1	157.705	139.658	336.604	121.729	161.231	208.06	145.77	92.6901	249.599	141.969	128.566	256.133
2078	1779	637	ENSGALT00000032448	ENSGALG00000012244	KLHDC2	77.9781	66.8952	137.361	86.0219	95.8831	84.746	80.9968	60.9393	85.2647	68.9915	54.5239	105.792
2752	2453	637	ENSGALT00000014399	ENSGALG00000008864	FXR1	64.8721	49.6279	3.38648	62.386	59.136	57.015	34.4798	25.5157	59.5947	52.8905	50.8405	65.1741
2988	2689	637	ENSGALT00000006362	ENSGALG00000003993	DNMT3A	52.3827	47.6417	74.4642	56.9107	57.636	45.559	40.5764	15.9677	48.6229	34.9876	111.189	36.4062
3252	2953	635	ENSGALT00000000806	ENSGALG00000000577	RANBP3	47.1577	36.1392	63.0014	51.6602	39.3625	39.3278	31.3505	27.5251	46.0732	30.8354	29.5986	40.6041
1008	709	635	ENSGALT00000039703	ENSGALG00000007463	HBAD	374.576	424.603	577.529	215.166	169.277	371.249	526.063	463.541	460.822	524.274	506.647	310.405
1011	712	634.991	ENSGALT00000041028	ENSGALG00000001364	CSNK1A1	206.87	150.824	243.79	214.256	143.991	147.881	68.7664	47.6123	178.059	113.378	76.7918	168.522
15285	14986	634	ENSGALT00000017651	ENSGALG00000010858	LRP2	5.474	4.91959	8.89222	10.1636	4.06738	7.07384	1.7081	0.869523	7.17285	2.97433	1.74262	6.88277
4326	4027	633	ENSGALT00000009993	ENSGALG00000006193	TXNRD3	42.0335	33.8466	56.5991	37.7631	34.0273	33.7804	27.8362	16.8422	34.5522	36.566	31.6306	40.1869
1641	1342	633	ENSGALT00000016282	ENSGALG00000010025	SNX6	124.84	103.939	207.882	113.317	102.459	111.498	76.0586	49.8229	136.47	116.724	93.724	140.854
4660	4361	633	ENSGALT00000003221	ENSGALG00000002070	SAP130	35.0521	31.463	2.46043	34.8709	37.3262	35.5288	24.5548	17.3892	41.8848	22.0845	25.664	40.5894
2602	2303	633	ENSGALT00000024849	ENSGALG00000015405	PREP	71.2404	54.4411	133.16	66.0321	57.8584	61.8969	45.2933	32.6502	69.5515	50.9438	54.3833	83.9179
1789	1490	633	ENSGALT00000012100	ENSGALG00000007484	GOT1	108.859	93.0037	140.541	102.062	104.808	99.2822	114.746	72.3289	101.284	111.22	111.599	108.23
5735	5436	632	ENSGALT00000010839	ENSGALG00000006704	VPS8	28.7338	22.1853	1.3053	27.9308	25.9463	25.9235	16.9913	12.7911	33.4954	17.19	14.5102	27.7113
996	697	632	ENSGALT00000006247	ENSGALG00000003921	DBNDD2	126.689	98.9189	317.821	217.836	220.663	325.623	187.3	183.736	206.275	215.147	202.63	297.512
1217	918	631.643	ENSGALT00000042974	ENSGALG00000028505	PSMD4	118.41	112.784	152.756	165.301	118.646	186.786	108.564	64.3612	173.331	167.547	160.084	152.039
5776	5477	630.937	ENSGALT00000012598	ENSGALG00000007766	KIAA1217	23.6675	13.6968	42.3179	27.6751	15.9045	24.778	7.59246	2.91264	30.808	7.88295	6.56621	19.8145
4848	4549	630.861	ENSGALT00000044185	ENSGALG00000026999	SNRPB2	34.454	28.8989	57.3335	33.3168	31.7713	40.0172	32.7983	30.3058	39.4151	47.0889	45.1397	44.1226
9056	8757	630.831	ENSGALT00000042839	ENSGALG00000027774	ALMS1	16.4895	11.2282	24.1421	17.3063	11.7256	14.7008	5.83713	2.16969	18.254	7.04849	5.45672	12.7114
2061	1762	630	ENSGALT00000014333	ENSGALG00000008818	IDH1	95.9906	99.051	133.677	85.8974	88.2269	80.5399	68.9456	61.406	83.2944	95.948	81.6675	103.188
2136	1837	629	ENSGALT00000036280	ENSGALG00000025904	WDR82	89.7479	77.2938	184.934	82.2597	78.5802	96.102	54.6348	37.0371	113.196	69.5863	63.537	121.179
7418	7119	629	ENSGALT00000013650	ENSGALG00000008378	SRGAP3	17.7625	15.598	37.4861	21.2264	19.6796	25.6339	11.8807	6.75151	28.8433	12.2764	8.38476	25.1399
1874	1575	629	ENSGALT00000005511	ENSGALG00000003483	GOLGA7	104	80.4718	208.555	95.9435	95.852	100.533	90.0658	69.2392	129.637	101.579	100.162	154.909
2352	2053	629	ENSGALT00000036606	ENSGALG00000016056	AZIN1	89.2066	67.2774	179.639	73.605	82.0506	107.687	74.9143	51.9737	107.772	93.0486	86.4464	137.663
2736	2437	628.45	ENSGALT00000001896	ENSGALG00000015770	APP	45.3317	81.1155	95.0814	61.9528	46.916	73.8841	25.0969	31.3163	105.279	77.4798	44.2142	93.7691
3994	3695	628	ENSGALT00000016124	ENSGALG00000009915	EML4	42.092	35.6561	60.1858	40.8311	38.4913	32.676	9.87189	4.91407	39.9287	16.0699	12.4044	31.3892
6225	5926	627	ENSGALT00000043188	ENSGALG00000029011	SLC35F1	14.4057	13.5545	29.7297	25.4186	20.2926	26.146	13.3546	8.50722	28.6253	16.091	15.6487	25.0678
8997	8698	627	ENSGALT00000014094	ENSGALG00000008653	MGA	13.9399	6.72331	21.1106	17.3178	8.01279	12.5948	1.81481	0.171916	16.8068	3.07473	2.26712	12.0912
6973	6674	626	ENSGALT00000041238	ENSGALG00000002302	YEATS2	20.3059	17.0813	0.829791	22.5338	17.2749	21.0405	9.89221	5.79335	25.3881	8.08595	7.187	20.818
4899	4600	626	ENSGALT00000003210	ENSGALG00000002062	SRP68	31.926	27.8991	42.25	32.6935	28.0938	27.5713	22.4907	17.6699	30.0175	21.6984	22.361	31.4553
2964	2665	626	ENSGALT00000023157	ENSGALG00000014330	NECAP1	59.4613	48.0707	108.319	56.4316	51.9495	50.2474	46.0645	30.0588	63.6523	37.5128	35.5971	70.8104
7978	7679	625.095	ENSGALT00000016203	ENSGALG00000009968	OTUD4	19.7403	16.5225	43.4432	19.5563	19.3289	22.9534	13.6299	11.6226	23.8955	19.167	19.9036	24.83
3492	3193	625	ENSGALT00000004817	ENSGALG00000003047	SUGP2	42.4434	28.2206	65.6372	47.0248	33.0742	40.2307	9.55335	4.34862	52.9755	19.4937	15.0223	39.9883
3303	3004	625	ENSGALT00000002579	ENSGALG00000013978	PPP2R4	46.9787	34.7682	62.6231	49.9834	37.0426	40.7346	35.1499	23.68	50.7516	24.0058	23.7737	42.5463
1244	945	625	ENSGALT00000017035	ENSGALG00000010464	GLRX3	161.477	140.139	226.356	158.889	139.753	125.967	150.561	127.832	138.459	199.115	237.997	176.471
4853	4554	623.87	ENSGALT00000043888	ENSGALG00000027627	RIL	22.2145	20.1518	35.0576	32.9114	32.2258	36.3899	30.8897	31.2366	34.9482	22.9857	17.9907	36.2853
7673	7374	623.118	ENSGALT00000013255	ENSGALG00000008156	SPTBN1	12.0072	2.90526	12.7406	20.3008	1.6616	14.5118	0	0	25.462	0.39071	0	6.90819
1324	1025	623	ENSGALT00000029612	ENSGALG00000003755	VDAC3	176.982	153.843	273.187	146.019	157.196	164.219	143.805	143.176	184.324	210.442	214.742	208.108
2296	1997	622	ENSGALT00000021576	ENSGALG00000013207	CTNNAL1	58.6451	43.6405	143.945	74.8269	56.4315	99.324	28.7338	18.8801	126.643	92.3098	65.6521	121.731
4181	3882	622	ENSGALT00000010888	ENSGALG00000006730		40.8203	40.7965	62.5471	38.4929	26.778	35.1699	18.4081	10.7304	46.7547	21.6929	17.7103	40.0425
1557	1258	621	ENSGALT00000010377	ENSGALG00000006428	UBE2I	124.693	98.0365	232.218	118.592	105.357	184.634	108.013	91.8658	189.226	169.694	152.092	183.588
3111	2812	621	ENSGALT00000019356	ENSGALG00000011863	POLDIP3	48.7633	44.8295	84.5007	53.0544	45.5371	43.6418	37.8154	23.8914	52.8099	41.4394	39.4221	50.8263
2091	1792	621	ENSGALT00000018869	ENSGALG00000011568	GRSF1	86.8656	65.0132	137.234	83.2528	72.1158	85.9094	54.5188	42.3182	76.3538	76.7526	79.1107	96.5194
11311	11012	621	ENSGALT00000015914	ENSGALG00000009783	GOLGB1	11.907	9.85647	14.4272	13.5479	8.62464	9.45302	4.85244	2.8322	11.0057	4.62595	3.48464	6.55836
1844	1545	620	ENSGALT00000019061	ENSGALG00000011660	WTAP	93.1554	85.2745	154.693	96.407	86.2445	82.8226	66.9625	49.3602	96.0551	91.1869	70.3709	102.945
3498	3199	620	ENSGALT00000018131	ENSGALG00000011123	TAX1BP1	45.4076	34.925	85.8013	46.5611	45.5671	47.6595	24.3387	20.0997	64.3081	35.7793	27.4891	53.4154
7040	6741	620	ENSGALT00000012422	ENSGALG00000007665	POLE	19.2137	15.6288	27.4704	22.096	17.5588	18.3207	11.6925	7.47868	19.8395	8.38343	6.87838	17.3463
1977	1678	620	ENSGALT00000026714	ENSGALG00000016555	HADHB	89.1105	87.7368	99.2175	88.7657	66.3147	64.315	65.0238	60.7881	82.0587	59.1984	58.441	79.9363
3924	3625	620	ENSGALT00000002657	ENSGALG00000001731	CDK12	35.7663	23.4137	52.5158	41.0893	29.3934	35.8856	12.534	6.77684	45.7573	13.7014	10.1445	34.7169
13113	12814	619	ENSGALT00000027346	ENSGALG00000016915	MYCBP2	10.2117	6.51704	16.6932	11.6052	6.56366	9.06314	2.26398	1.09193	11.702	3.39153	2.95301	9.38688
5594	5295	619	ENSGALT00000020879	ENSGALG00000012796	KIAA1549	28.6172	27.9329	52.7851	28.0847	20.4353	25.798	8.84275	3.75192	35.1527	9.68071	6.34112	27.4699
4023	3724	619	ENSGALT00000017413	ENSGALG00000010704	GLCCI1	33.8842	29.4515	60.0887	39.9325	39.0163	37.917	26.3197	19.7614	36.2235	27.4004	52.3778	39.5167
2410	2111	619	ENSGALT00000010597	ENSGALG00000006564	DNAJB11	74.2446	88.8195	4.18107	70.4446	72.074	153.101	68.7636	48.8254	161.856	82.3478	65.6412	118.602
6651	6352	619	ENSGALT00000009699	ENSGALG00000006026	CNOT6	27.6351	23.1415	41.6583	23.4113	22.1303	21.2598	15.5653	8.94557	23.9863	20.7259	18.3749	22.5205
2458	2159	619	ENSGALT00000013124	ENSGALG00000008086	ACTR1A	75.9302	63.7635	113.185	68.8785	61.8268	52.2495	42.1885	18.997	75.3078	48.3692	36.2874	71.5593
6146	5847	618.905	ENSGALT00000016306	ENSGALG00000010039	BRE	31.1399	25.8357	59.3484	25.4294	27.5343	31.5676	21.929	15.3169	38.1989	25.5005	21.8071	35.6751
4706	4407	618	ENSGALT00000004968	ENSGALG00000003143	ZC3H7A	32.3859	26.2295	71.1181	33.6892	31.7365	35.9132	17.038	10.2034	43.0898	25.1411	19.8332	45.7335
6053	5754	617	ENSGALT00000007633	ENSGALG00000004780	NAA25	25.9171	21.1965	40.3634	25.7609	22.0488	23.937	14.4952	8.33458	30.5207	15.6313	13.8009	24.1795
12021	11722	617	ENSGALT00000023447	ENSGALG00000014531	HECTD4	11.8003	7.26004	15.6498	12.6453	6.97357	8.12531	2.54768	1.01141	12.257	2.66178	2.31878	9.5492
6126	5827	617	ENSGALT00000013157	ENSGALG00000008104	CCDC88A	24.2419	11.637	41.5803	25.4382	15.0827	20.0034	4.2282	1.22811	29.4262	6.82987	8.04876	21.8905
1811	1512	616.466	ENSGALT00000045166	ENSGALG00000002060	TAF15	76.7471	63.6824	148.697	97.9497	93.7934	114.218	55.8459	70.0233	118.773	105.948	81.6801	116.518
2493	2194	616	ENSGALT00000003881	ENSGALG00000002460	WDR75	69.2472	57.4569	108.618	67.4512	55.7794	66.9086	42.0502	33.5421	72.6551	56.4495	46.8827	73.4731
9003	8704	616	ENSGALT00000021178	ENSGALG00000012979	TRIO	14.5126	9.77737	27.1207	17.0023	11.5359	14.3516	3.02668	1.48482	21.7174	4.38945	2.20432	16.6602
4756	4457	616	ENSGALT00000024342	ENSGALG00000015091	HAUS6	35.3745	27.4669	1.94148	33.2035	31.2745	30.8232	17.3494	14.4265	39.7054	32.8596	25.2308	34.5361
1627	1328	616	ENSGALT00000003268	ENSGALG00000002095	CHMP4B	88.6906	64.597	166.417	111.437	103.539	122.378	69.5518	54.2891	120.107	103.33	98.324	130.243
3471	3172	615	ENSGALT00000023879	ENSGALG00000014791	WDR3	45.1213	32.9267	76.6018	46.5787	38.06	51.771	27.9419	19.5973	59.5928	28.1043	27.0511	53.4913
2444	2145	615	ENSGALT00000011255	ENSGALG00000006947	BDH1	91.1015	69.4838	2.33978	68.88	70.491	51.7652	57.4306	44.4165	63.2935	58.407	60.6253	64.6262
7085	6786	615	ENSGALT00000003054	ENSGALG00000001967	ABCA3	19.1845	17.9395	29.2519	21.7724	16.189	19.2427	9.52462	5.93382	23.6041	5.74738	3.37712	19.1884
3529	3230	614	ENSGALT00000023500	ENSGALG00000014573	NAT10	47.2844	34.308	71.4221	45.6679	37.1571	40.603	29.2563	20.3036	47.9474	31.7888	34.3204	47.3814
1787	1488	614	ENSGALT00000010265	ENSGALG00000006350	DDT	106.764	91.5995	200.977	99.1313	98.2808	113.598	116.047	84.2699	128.851	103.453	109.6	148.071
4204	3905	613	ENSGALT00000008413	ENSGALG00000005237	FGD3	31.8695	24.0074	60.2287	37.7125	34.1224	39.3512	17.2617	10.2296	41.5621	26.1717	23.4746	46.6409
3845	3546	613	ENSGALT00000007367	ENSGALG00000004625	ATXN2	44.6882	31.8924	56.7605	41.5305	31.6472	37.1644	23.6113	18.2232	44.763	24.1973	26.1518	38.1476
579	280	613	ENSGALT00000033786	ENSGALG00000021021	ARL4C	217.707	131.652	482.723	525.954	387.289	494.687	121.132	90.406	376.664	133.038	100.881	511.571
5619	5320	612.778	ENSGALT00000026651	ENSGALG00000016517	SNX17	26.9726	24.2365	36.8497	27.6718	28.0579	25.5014	23.7199	18.9124	30.0079	17.5899	16.8192	28.6885
1075	776	611	ENSGALT00000034804	ENSGALG00000005090	SKA2	180.829	155.118	248.221	189.158	156.793	166.906	176.479	154.57	168.24	222.375	179.255	186.706
918	619	611	ENSGALT00000018234	ENSGALG00000011184	HNRNPD	234.452	209.166	453.487	237.135	247.323	327.415	219.517	145.805	340.918	279.805	280.685	359.214
2367	2068	611	ENSGALT00000003067	ENSGALG00000001973	GNL2	62.1787	43.4626	97.8293	70.98	49.81	60.507	37.6497	29.5945	71.2027	63.276	68.5524	72.0171
3463	3164	611	ENSGALT00000007219	ENSGALG00000004534	DCTN4	46.5001	38.9791	81.3354	46.3928	44.8765	47.7167	28.2148	22.2462	60.7499	26.3137	24.9297	56.6446
3144	2845	611	ENSGALT00000019608	ENSGALG00000012017	DAAM1	21.8484	19.4354	38.0192	51.5946	30.3934	43.036	6.14823	1.95222	36.0532	15.4434	8.80455	39.5225
2548	2249	610	ENSGALT00000003018	ENSGALG00000001950	PMPCA	68.6806	59.1883	112.041	65.1607	73.114	65.1149	54.9645	38.6582	74.139	53.1579	55.6891	81.0682
4368	4069	609	ENSGALT00000013539	ENSGALG00000008318	SLK	28.2903	16.6088	53.9733	35.9563	18.0573	30.334	4.87544	0.708734	43.7049	9.97631	8.64466	30.8354
6712	6413	609	ENSGALT00000026230	ENSGALG00000016267	PHF3	18.8028	12.5961	32.4376	22.814	16.9096	17.9878	5.95402	3.33101	22.8855	11.3442	10.8868	17.8983
2136	1837	609	ENSGALT00000040755	ENSGALG00000024128	NCAPH	86.1174	63.2967	111.45	79.6441	73.3072	74.746	58.8732	54.6545	79.9462	55.721	44.0987	74.9798
1073	774	608	ENSGALT00000031107	ENSGALG00000019598	PSMA2	224.553	199.323	357.754	188.716	204.205	171.363	193.471	156.763	212.308	319.615	294.021	278.618
4386	4087	608	ENSGALT00000027571	ENSGALG00000017070	PDS5B	29.8629	19.5978	45.1396	35.7392	21.0415	24.3786	8.4553	5.06996	32.7701	16.6319	19.5604	24.6185
1655	1356	607	ENSGALT00000015342	ENSGALG00000009421	SRSF5	113.911	111.759	200.631	107.541	133.285	138.077	82.4309	61.1236	151.925	119.628	73.4976	177.922
5234	4935	607	ENSGALT00000015998	ENSGALG00000005282	NKTR	27.1911	20.3339	41.8017	29.5493	25.5165	22.098	4.66826	2.25088	25.9268	13.2578	12.8514	21.4262
986	687	607	ENSGALT00000027813	ENSGALG00000017207	CWC15	168.336	125.531	255.438	212.265	158.535	217.184	146.867	151.429	225.71	218.511	221.871	198.098
3798	3499	606	ENSGALT00000015126	ENSGALG00000009298	TNIK	29.5061	21.3304	1.08814	41.6077	33.8279	35.3564	10.0896	4.88408	34.9953	17.5615	13.8608	29.4785
1553	1254	606	ENSGALT00000021786	ENSGALG00000013352	SF3B4	99.8811	85.103	153.19	116.097	90.8093	96.9034	103.68	73.5056	97.1078	66.0121	67.5758	103.837
3468	3169	606	ENSGALT00000025294	ENSGALG00000015681	NRIP1	35.9881	19.1716	46.5289	45.9405	21.0236	27.6642	6.6976	3.03338	39.553	9.3937	14.2951	27.2399
1729	1430	606	ENSGALT00000008924	ENSGALG00000007227	MSI1	91.0393	66.5135	129.374	101.808	64.1027	76.7069	29.0882	11.0543	91.9713	24.0456	16.7713	75.2252
5216	4917	604.685	ENSGALT00000015581	ENSGALG00000009566	IARS2	28.7826	28.2164	55.7519	29.5443	25.6931	34.5748	21.9283	17.682	34.8988	26.543	20.1439	36.1815
6636	6337	604	ENSGALT00000004699	ENSGALG00000002971	NSD1	18.9231	12.5317	29.4402	22.8981	15.3228	17.0414	3.68595	1.21355	24.7436	3.51691	2.35486	19.1508
1987	1688	604	ENSGALT00000016469	ENSGALG00000010127	GLO1	100.989	93.9571	184.854	85.9627	103.711	78.1555	96.4208	81.8783	93.8056	156.267	158.498	124.608
2713	2414	604	ENSGALT00000043674	ENSGALG00000027526	COL9A2	41.2208	59.6672	54.9157	60.1098	69.8782	87.6522	42.7246	37.3875	70.5105	60.2735	39.0776	64.8124
10033	9734	604	ENSGALT00000006250	ENSGALG00000003923	COL6A3	16.6906	13.5583	18.1704	14.907	9.15021	10.3813	3.58299	2.89681	15.8507	1.89707	1.97107	10.8887
2889	2590	603	ENSGALT00000015988	ENSGALG00000009835	XPOT	69.7838	55.0855	115.131	55.9323	47.3422	47.7926	34.0149	21.8979	62.1052	49.1094	42.3896	61.5313
3433	3134	603	ENSGALT00000019543	ENSGALG00000011980	UBP1	53.5848	38.9166	94.2074	46.2236	43.7984	46.7499	28.3148	17.3811	58.6528	35.1499	26.8689	57.429
939	640	603	ENSGALT00000026387	ENSGALG00000016357	PRDX4	294.703	366.563	520.272	226.351	274.646	227.822	293.973	263.851	244.698	398.971	408.045	407.407
3083	2784	602	ENSGALT00000001567	ENSGALG00000001046	DLGAP4	42.4502	30.977	65.2096	51.9485	41.1579	48.2014	20.8027	13.7731	52.128	26.6461	27.5667	44.182
5208	4909	601	ENSGALT00000027208	ENSGALG00000016843	COL4A2	27.3351	31.5663	41.9879	29.4122	24.1116	27.062	11.689	4.80846	42.7915	7.52337	4.88552	25.5461
4474	4175	600	ENSGALT00000009244	ENSGALG00000005758	SPPL2A	39.8405	45.5637	64.334	34.5255	40.0643	27.9016	28.8421	19.3919	31.1318	30.5417	23.4884	35.8085
4265	3966	600	ENSGALT00000000811	ENSGALG00000000581	DDX42	35.3817	30.0641	61.0478	36.3449	34.5506	34.1214	22.1059	13.3309	42.1637	23.6016	17.8727	38.3653
6242	5943	600	ENSGALT00000011292	ENSGALG00000006971	CDK5RAP2	20.7162	15.2004	37.3034	24.2544	17.5313	20.03	8.05804	6.43405	24.0459	11.2234	8.34005	22.5912
2876	2577	599	ENSGALT00000022912	ENSGALG00000014167	TTLL12	55.6428	42.8249	92.6765	55.8416	50.8815	56.1401	37.5803	30.1319	60.6212	43.2415	35.365	63.8295
1285	986	598.644	ENSGALT00000026339	ENSGALG00000016328	GSTA	191.257	141.515	310.09	145.86	111.956	220.773	154.966	117.375	285.475	211.744	148.644	186.942
3901	3602	598	ENSGALT00000023118	ENSGALG00000014298	RFC1	38.9572	25.7742	63.0369	39.8844	27.679	34.8762	18.2696	11.95	41.8972	23.8211	22.934	39.6263
2257	1958	598	ENSGALT00000010135	ENSGALG00000006271	RACGAP1	73.3018	62.1742	60.2805	73.3726	68.2943	82.3512	58.6122	54.059	87.8188	68.6194	66.9598	93.3104
786	487	598	ENSGALT00000045469	ENSGALG00000027648	MRPS15	232.538	186.429	423.241	294.997	249.353	332.84	243.099	177.868	315.234	353.031	456.351	357.497
6438	6139	598	ENSGALT00000011945	ENSGALG00000007387	GTF3C1	20.7067	19.8301	35.7459	23.4018	20.1658	22.2743	12.509	8.50782	24.7871	13.2508	11.8936	19.068
1887	1588	598	ENSGALT00000008412	ENSGALG00000005236	FARSB	101.133	75.5143	5.01317	90.4682	87.4798	87.7149	89.4628	82.8643	93.9402	83.5049	85.5818	98.9228
747	448	598	ENSGALT00000009809	ENSGALG00000006077	C5H11ORF58	321.261	279.353	518.417	320.678	323.269	296.218	265.928	239.128	308.861	414.322	448.492	407.675
1832	1533	597	ENSGALT00000034726	ENSGALG00000002189	SNX1	95.7118	75.255	128.132	93.5573	100.79	111.603	69.1565	57.0622	109.081	98.9619	87.9569	103.008
4687	4388	597	ENSGALT00000001018	ENSGALG00000000721	SLC41A1	35.11	36.2477	55.8472	32.6854	28.3743	33.0186	28.5115	17.842	39.626	20.2798	15.911	37.0104
3529	3230	597	ENSGALT00000045048	ENSGALG00000025764	FKBP10	33.9044	46.0023	45.543	44.4035	40.5217	39.5945	30.5772	22.8829	39.7321	17.4962	16.0052	38.4534
423	124	597	ENSGALT00000045513	ENSGALG00000028664	CKS1B	1550.09	1178.1	1730.63	1156.64	1632.83	754.398	2161.52	2003.53	765.713	1048.86	911.183	1016.95
3365	3066	597	ENSGALT00000024267	ENSGALG00000015049	AMD1	62.9523	54.7714	97.8208	46.7786	51.5507	49.3804	36.9785	22.4696	52.7466	36.3968	37.5468	65.695
3538	3239	596	ENSGALT00000031983	ENSGALG00000008605		36.6929	28.0305	48.1948	44.206	36.1057	35.8552	18.8683	13.7509	41.7666	23.7385	19.5807	34.422
2093	1794	595	ENSGALT00000019216	ENSGALG00000011770	UMPS	92.0478	64.5602	135.634	79.6783	73.7474	75.3929	71.8774	43.1641	88.1016	68.326	65.0599	89.5731
6728	6429	595	ENSGALT00000004696	ENSGALG00000002969	MAU2	21.8267	19.6789	33.9061	22.2341	21.755	20.4214	14.2674	10.9151	23.2038	13.0245	13.6783	23.6279
5315	5016	595	ENSGALT00000016730	ENSGALG00000010284	GMPS	28.0284	23.5439	1.41459	28.4974	26.4233	26.0329	16.2027	10.732	30.8367	19.0102	17.0002	30.246
2753	2454	595	ENSGALT00000013228	ENSGALG00000008144	COPG2	57.1272	47.1968	88.3653	58.2489	47.3665	50.5567	32.5534	23.2855	62.1262	37.4948	29.7535	60.1223
7001	6702	594.279	ENSGALT00000002560	ENSGALG00000001672	NEK4	18.4884	17.0378	31.8422	21.3026	18.4502	21.3003	13.6985	10.3281	21.7615	20.73	20.6394	23.6738
2369	2070	594	ENSGALT00000021508	ENSGALG00000013167	SDHA	63.9229	71.2318	95.9791	68.9385	62.8872	63.63	55.5955	39.834	74.3969	49.6029	50.4635	81.4489
2551	2252	594	ENSGALT00000040616	ENSGALG00000028205	PRPF3	55.3807	42.5386	85.0715	63.3671	46.055	48.2994	29.6953	24.3308	57.9296	41.4235	35.4989	56.2762
2611	2312	594	ENSGALT00000026894	ENSGALG00000016665	FDFT1	81.6363	63.6709	107.861	61.7226	64.3774	69.4648	60.1559	49.8472	86.2974	59.4211	50.7138	73.632
5048	4749	594	ENSGALT00000027300	ENSGALG00000016894	DNAJC3	31.6827	30.1861	47.1196	30.049	25.2224	28.1676	18.9328	12.4149	32.5095	22.1908	16.6093	33.0252
1152	853	594	ENSGALT00000001320	ENSGALG00000000898	C11H16ORF80	162.16	134.714	242.045	167.295	160.919	148.269	187.681	180.436	151.922	192.783	171.196	198.396
3184	2885	593	ENSGALT00000000423	ENSGALG00000000317	NEFM	21.0831	16.9575	43.7307	49.3804	31.6098	36.5238	21.7011	19.2885	46.8247	70.9047	75.556	54.8011
4490	4191	593	ENSGALT00000017959	ENSGALG00000011024	CACHD1	35.9328	31.7077	1.11494	33.9925	23.8453	26.2744	10.3069	4.74026	34.1902	9.57195	8.26584	28.0063
4485	4186	592.651	ENSGALT00000009016	ENSGALG00000005618	CTR9	28.838	19.5692	48.041	34.013	26.6958	30.4978	16.103	11.329	34.8764	22.2852	23.9359	28.29
3071	2772	592	ENSGALT00000021740	ENSGALG00000013310	MAEA	50.4293	44.2451	85.72	51.3067	44.7453	49.9939	39.8616	22.772	56.3568	52.6812	39.0296	57.0351
1465	1166	592	ENSGALT00000016649	ENSGALG00000010244	AKR1A1	125.494	87.0373	130.762	121.974	103.741	121.465	77.7515	68.4273	134.973	85.466	74.5042	101.369
3317	3018	591	ENSGALT00000045111	ENSGALG00000027376	FUNDC2	50.8269	48.706	82.0015	47.045	42.1157	72.5034	37.708	26.9676	94.6379	34.5493	22.7804	62.2556
2909	2610	591	ENSGALT00000004879	ENSGALG00000003086	EXOSC10	49.011	38.7962	86.4653	54.3992	46.0742	45.3644	26.0717	22.4258	60.1505	37.3884	37.3682	53.0881
6726	6427	590	ENSGALT00000003726	ENSGALG00000002364	SEC16A	19.7995	12.2146	28.4624	22.0541	14.1525	20.0311	5.70872	2.35986	23.8866	6.29134	4.31208	18.3709
2554	2255	590	ENSGALT00000003227	ENSGALG00000002076	DGCR8	50.4566	30.8776	91.6353	62.8566	46.0985	50.7474	11.3042	0.899941	64.699	21.3195	14.417	48.1525
2130	1831	589.319	ENSGALT00000002586	ENSGALG00000001691	CPSF3L	65.8229	52.5349	110.704	77.3228	70.0982	79.9503	58.6371	49.3237	80.9344	69.1342	65.4263	80.6335
3806	3507	589	ENSGALT00000002948	ENSGALG00000001907	WAPAL	36.8936	23.1634	65.9782	40.3483	24.252	31.3787	8.45469	3.04559	46.6365	16.0235	12.1575	36.6964
6331	6032	588	ENSGALT00000016526	ENSGALG00000010163	LGR5	19.6145	21.4268	43.8396	23.4186	16.1368	22.869	9.8311	6.69326	25.8187	14.5942	11.4861	26.8814
1290	991	588	ENSGALT00000037566	ENSGALG00000023066	DNAJA1	149.943	113.888	3.66734	142.544	118.962	144.272	81.903	63.9128	163.579	121.441	94.6522	132.033
1830	1531	587.878	ENSGALT00000045497	ENSGALG00000026944	ARF6	108.818	97.3499	138.451	92.2482	97.9895	72.7034	78.7825	62.7179	74.4963	78.3657	93.2934	95.6249
6465	6166	587.846	ENSGALT00000002010	ENSGALG00000001318	CSK	18.507	15.167	29.519	22.9037	20.8288	20.0461	13.6733	9.87952	22.4067	14.1352	13.2831	20.8923
1486	1187	587	ENSGALT00000022506	ENSGALG00000013879	TIA1	103.271	108.501	172.043	118.804	118.824	118.958	77.7238	55.9689	127.545	87.7091	150.862	119.022
1389	1090	587	ENSGALT00000032744	ENSGALG00000004516	RAD51	137.793	88.0958	162.743	129.377	109.674	114.537	63.1134	64.8692	115.26	80.4716	77.2542	120.447
4112	3813	587	ENSGALT00000006417	ENSGALG00000004029	PHF12	33.688	28.8237	56.4169	36.9842	29.2453	34.0977	21.2866	14.202	41.4261	19.9562	16.7728	38.6608
2436	2137	586.382	ENSGALT00000002870	ENSGALG00000001852	LRWD1	58.2793	44.6485	81.956	65.9207	53.0662	58.4539	39.5905	30.2474	51.4746	44.3976	36.1981	62.1456
1352	1053	586	ENSGALT00000019461	ENSGALG00000011931	SNU13	128.953	93.3475	187.033	133.695	98.72	130.666	122.964	90.0724	143.685	106.278	98.6934	140.414
2385	2086	585.495	ENSGALT00000012696	ENSGALG00000007821	DNAJA3	69.6976	55.202	115.549	67.4301	62.8148	68.8284	54.1266	40.643	77.1115	52.9922	51.8292	86.5057
3348	3049	585.109	ENSGALT00000027285	ENSGALG00000016886	FARP1	30.1821	18.1603	30.7853	46.1025	21.1764	28.9069	2.96765	0.845044	32.2121	5.7503	0.622761	27.2225
8548	8249	585	ENSGALT00000009081	ENSGALG00000005660	NF1	17.011	8.88227	21.8821	17.0373	11.5421	11.7694	2.59886	0.479079	15.6395	4.28419	1.87365	11.5457
7423	7124	585	ENSGALT00000039566	ENSGALG00000007762	CREBBP	17.3381	14.0539	21.1349	19.7277	17.0791	13.1211	6.13831	3.02855	12.9758	6.32383	5.46123	11.1141
3870	3571	584	ENSGALT00000003062	ENSGALG00000001971	UBE2O	31.7127	20.7729	45.5557	39.2888	26.2653	31.3914	10.364	2.75173	42.1799	9.04948	10.7457	30.6374
1977	1678	584	ENSGALT00000007773	ENSGALG00000004869	ISCU	93.3236	75.1255	222.878	83.6116	89.8276	259.497	90.385	74.537	382.346	208.523	89.5671	204.194
1365	1066	583	ENSGALT00000009071	ENSGALG00000005654	PITPNB	119.373	91.36	210.079	131.388	111.922	154.848	77.041	73.0428	166.644	129.921	119.49	174.356
1823	1524	582	ENSGALT00000013007	ENSGALG00000008015	UBE2V1	95.4018	83.3141	197.365	91.7452	84.4875	109.334	91.6101	68.5427	128.72	101.635	112.257	141.046
2463	2164	582	ENSGALT00000005203	ENSGALG00000003288	TARS	76.8026	51.8393	3.11898	64.6117	60.7014	103.178	56.2856	46.6918	110.984	82.9792	81.7659	72.6798
7530	7231	582	ENSGALT00000018050	ENSGALG00000011078	PTPN13	15.0709	10.7306	26.1593	19.3362	12.7423	16.0215	5.76723	2.59969	16.0932	5.856	3.98003	15.8998
6917	6618	582	ENSGALT00000039066	ENSGALG00000004624	MYO5A	18.0188	10.3149	29.0269	21.1272	12.4946	15.1515	3.884	1.24271	19.0564	5.50841	3.78497	16.5889
6697	6398	582	ENSGALT00000009395	ENSGALG00000005846	MPDZ	16.3406	12.3998	0.266334	21.8537	12.8032	15.5287	6.17093	2.46816	20.3714	8.69873	6.69928	14.4769
4100	3801	582	ENSGALT00000018427	ENSGALG00000011296	FRMD1	38.4266	24.2452	82.0469	36.785	26.0434	41.7134	18.4075	8.48626	65.5975	20.2705	12.3389	45.3049
24381	24082	581.523	ENSGALT00000026264	ENSGALG00000016289	DST	4.34288	3.69448	6.88112	5.80122	4.14	4.12689	1.75529	1.16646	5.86429	2.64177	1.72621	4.24158
4646	4347	580	ENSGALT00000038810	ENSGALG00000007287	ZFP91	31.6362	26.3822	41.1657	32.0541	27.9354	28.4103	21.8368	15.4304	30.3439	12.4511	15.0802	26.8558
1483	1184	579	ENSGALT00000017033	ENSGALG00000010463	AHSA1	117.953	97.8217	151.723	117.482	98.5726	101.556	104.135	93.6381	111.488	139.157	114.784	115.638
4093	3794	578.994	ENSGALT00000001255	ENSGALG00000000856	EIF2D	36.2122	30.2275	42.0109	36.6625	30.8863	24.6929	25.9755	20.6073	28.8661	34.3221	36.2421	30.7533
2012	1713	578.851	ENSGALT00000025522	ENSGALG00000000814	HNRNPR	38.949	9.71606	40.2263	81.1811	20.2865	35.8879	2.95378	0.193419	85.9733	2.59887	0	19.9372
6581	6282	578.326	ENSGALT00000025624	ENSGALG00000015901	SENP6	23.4257	17.8541	50.6629	22.1167	23.4825	24.0244	15.6517	9.09963	28.6457	19.6294	15.1518	28.8491
3236	2937	578	ENSGALT00000044655	ENSGALG00000027720	OTX2	34.7434	31.6101	61.1644	47.2791	39.8183	39.8555	37.4043	29.3479	34.431	42.6026	48.4506	36.5835
949	650	578	ENSGALT00000020212	ENSGALG00000012379	C5H14ORF166	231.068	183.087	330.418	213.629	204.27	250.9	221.354	209.51	264.24	280.665	307.475	269.794
4643	4344	578	ENSGALT00000013587	ENSGALG00000008347	ATG13	32.2722	27.2909	56.0942	31.9656	27.7371	30.3209	22.5148	12.4905	37.2508	22.7206	17.1763	38.9721
5756	5457	577.817	ENSGALT00000022837	ENSGALG00000014106	PPFIBP1	28.7434	26.8913	47.5085	25.4379	30.1159	24.2189	17.9221	12.1849	26.9183	18.1118	14.9587	29.0384
2331	2032	577	ENSGALT00000015276	ENSGALG00000009379	SEC62	47.0664	55.4308	3.32159	68.2178	59.7613	67.9912	34.3275	34.9021	69.2351	57.973	75.5371	65.0767
2347	2048	577	ENSGALT00000036155	ENSGALG00000011937	NFE2L1	53.342	60.6641	87.0387	67.6848	53.2958	60.7867	27.185	14.342	72.275	20.987	15.0935	57.1264
4048	3749	577	ENSGALT00000023897	ENSGALG00000014801	NDC80	32.7687	23.6711	57.8416	36.9748	26.6567	31.5065	15.4765	10.0854	37.0114	25.6471	21.0396	37.4484
4113	3814	576	ENSGALT00000003002	ENSGALG00000001939	HIPK1	35.5677	19.3897	55.54	36.2817	20.0699	27.9431	6.57167	1.42822	41.7948	6.26077	4.33184	29.1331
5817	5518	575	ENSGALT00000010711	ENSGALG00000006631	TICRR	24.0039	17.6495	46.7628	25.0341	16.0129	23.0742	11.6747	7.62644	29.5527	16.7038	11.4936	27.3568
4017	3718	575	ENSGALT00000018144	ENSGALG00000011130	COPS4	38.9615	32.4366	58.8825	37.1539	31.8989	35.5022	31.2684	26.6591	34.1538	33.2254	27.6656	42.9654
2923	2624	575	ENSGALT00000020629	ENSGALG00000012640	C1H12ORF23	58.052	48.5617	80.7937	52.6441	49.88	49.6832	33.4522	28.4118	60.0502	39.555	31.888	61.1919
743	444	575	ENSGALT00000029963	ENSGALG00000018992		307.032	246.508	87.3112	311.122	289.466	312.443	217.157	197.981	279.914	221.218	188.455	277.033
4561	4262	574.231	ENSGALT00000012830	ENSGALG00000007904	DLAT	30.5927	24.4486	52.6846	32.3682	26.6003	24.3835	25.3533	13.0541	29.2374	24.0196	23.1532	33.4705
4599	4300	574	ENSGALT00000039127	ENSGALG00000006902	ZNF335	33.9052	31.9094	50.6713	32.0693	36.4822	43.8388	21.1577	16.1952	44.1396	18.3625	12.5183	34.1793
4573	4274	574	ENSGALT00000005597	ENSGALG00000021316	SLC12A4	31.1154	35.3511	48.5905	32.2643	29.4075	29.5252	16.4452	9.02152	32.736	20.4855	13.9661	32.5228
1545	1246	574	ENSGALT00000012860	ENSGALG00000007919	EIF4E2	112.726	96.0588	4.72243	110.672	91.582	116.849	110.252	96.1794	146.365	130.189	145.002	132.622
7743	7444	574	ENSGALT00000010286	ENSGALG00000006363	CABIN1	15.6252	11.7074	26.4338	18.5247	14.2819	16.0007	7.035	4.04622	18.1733	7.69863	6.72997	15.3429
5106	4807	573	ENSGALT00000004401	ENSGALG00000002787	MED23	32.6601	22.7215	55.0836	28.6369	26.3434	24.6752	14.4886	10.1543	35.4093	19.6049	15.411	32.9161
5098	4799	573	ENSGALT00000002721	ENSGALG00000001772	MAPK8IP3	24.6406	24.9405	31.6628	28.6846	23.4335	23.2197	7.53421	2.47047	27.2044	7.52996	4.99751	23.1403
1376	1077	572	ENSGALT00000016285	ENSGALG00000010027	CFL2	132.397	103.737	220.467	127.593	144.341	130.187	91.7031	59.4043	170.317	163.181	114.806	164.531
1456	1157	572	ENSGALT00000037877	ENSGALG00000010908	CDCA7L	135.232	100.695	252.191	118.77	117.413	120.145	70.4285	45.7884	169.966	125.344	95.3517	164.906
2013	1714	571.668	ENSGALT00000011818	ENSGALG00000007300		97.3369	91.972	164.512	80.127	84.2112	108.875	99.0292	75.7027	103.069	67.7244	69.6512	115.214
2847	2548	571	ENSGALT00000015293	ENSGALG00000009385	CAPZA2	63.9716	52.332	114.787	53.8372	54.4277	53.8887	50.1471	36.9723	63.1668	72.5979	62.5408	74.1115
2343	2044	570	ENSGALT00000019246	ENSGALG00000011795	YTHDC1	63.4961	53.1015	109.477	66.9945	58.8326	64.474	23.8465	18.2892	75.5321	35.3584	25.0312	67.3555
1078	779	570	ENSGALT00000023065	ENSGALG00000014261	UCH-L1	160.784	190.157	309.026	175.785	184.697	200.17	217.147	219.65	221.474	311.842	265.452	298.505
714	415	570	ENSGALT00000023589	ENSGALG00000014636	SARNP	220.17	174.361	196.416	329.968	216.899	349.122	122.848	84.6749	313.658	155.355	147.687	307.669
1490	1191	570	ENSGALT00000005624	ENSGALG00000003554	OPTC	146.939	215.128	153.301	114.976	84.901	117.191	154.567	169.226	156.04	104.389	98.8945	82.4091
3961	3662	569.961	ENSGALT00000015688	ENSGALG00000009634	GFM1	37.006	35.0981	2.17392	37.3914	30.3748	35.637	27.6103	19.6876	41.2335	35.8511	33.328	45.1903
3244	2945	569.618	ENSGALT00000021913	ENSGALG00000013438	TEX10	55.5895	38.6089	85.1827	46.467	40.3418	40.6562	36.1146	29.7851	54.1521	35.5674	33.2483	53.1123
2449	2150	569	ENSGALT00000039050	ENSGALG00000020260	PGRMC1	75.6897	89.8542	134.265	63.5798	74.3928	54.8726	67.5659	42.5745	81.0984	62.2694	65.6899	93.0077
1895	1596	569	ENSGALT00000028108	ENSGALG00000006334	LAP3	81.236	64.0152	118.52	85.6495	69.5738	86.2991	66.8276	55.2113	100.301	68.9228	67.7883	96.9609
5751	5452	569	ENSGALT00000019030	ENSGALG00000011645	CLASP1	23.5116	14.2738	43.742	25.0727	17.2035	23.5354	8.1186	2.05703	31.1494	9.22675	7.03831	24.4402
5421	5122	568	ENSGALT00000044814	ENSGALG00000028227	SLC25A20	28.6463	29.0541	51.1216	26.6412	31.1347	27.803	27.4659	19.3515	31.2912	32.5094	24.6604	36.559
2088	1789	568	ENSGALT00000020376	ENSGALG00000012468	PRPF39	77.1694	60.6705	151.878	76.2752	67.3505	74.2578	22.5953	9.97042	97.3013	41.2881	33.0677	96.8227
5050	4751	568	ENSGALT00000040160	ENSGALG00000006409	PODXL	29.311	35.2023	44.222	28.7216	17.5041	22.447	17.4656	11.7577	36.1516	16.1503	13.3491	23.627
1688	1389	568	ENSGALT00000005348	ENSGALG00000003385	LSM4	103.618	91.5754	148.892	98.2407	89.9776	88.5048	97.6728	64.3621	106.426	79.538	82.8787	104.035
1536	1237	568	ENSGALT00000015544	ENSGALG00000009549	KPNA4	121.31	85.7207	9.51359	110.312	95.8771	134.587	39.4898	16.0602	180.348	70.1365	46.9622	145.09
5931	5632	567.94	ENSGALT00000000495	ENSGALG00000000363	SMARCD2	25.2789	19.5982	34.0258	24.2262	21.0949	21.2207	19.2427	14.8416	21.2625	16.4081	13.9248	19.6404
2527	2228	567.656	ENSGALT00000000123	ENSGALG00000000086	TIMM17A	55.2624	53.8314	96.2799	61.209	45.6991	81.0351	54.038	48.6025	66.2882	63.3051	69.4213	75.4851
1257	958	567.33	ENSGALT00000033927	ENSGALG00000027907	NR2F1	88.7894	79.3445	1.26455	142.271	94.797	101.506	67.3457	51.7265	70.7548	44.3787	50.069	60.695
3455	3156	567.005	ENSGALT00000005609	ENSGALG00000003547	SKP2	42.7431	31.8709	2.61117	43.1613	36.2905	34.8424	30.9614	21.309	44.3221	40.3541	37.5455	45.774
2290	1991	567	ENSGALT00000038908	ENSGALG00000010411	RNF13	72.4888	84.4583	5.30229	68.4159	74.7567	80.7728	51.1053	39.9125	102.55	78.6758	57.0164	110.472
1550	1251	567	ENSGALT00000013981	ENSGALG00000008587	NDUFAF1	126.35	102.041	199.21	108.886	122.754	171.459	112.454	78.5485	157.504	140.612	137.18	171.826
10837	10538	567	ENSGALT00000045755	ENSGALG00000026470	BOD1L1	10.5439	7.36318	20.8241	12.9262	8.58661	9.8715	2.81368	1.80413	15.2091	6.31445	7.7885	11.5523
11225	10926	567	ENSGALT00000017299	ENSGALG00000010630	AHCTF1	12.2449	8.97605	22.5239	12.4672	9.16823	10.9857	4.65635	2.48302	15.2695	6.90613	5.65833	12.5022
2276	1977	566	ENSGALT00000009090	ENSGALG00000005668	SWiP-1	80.9636	85.747	145.314	68.7789	81.1417	74.8974	49.3632	35.4409	82.4357	53.3856	40.9759	104.857
3994	3695	566	ENSGALT00000017953	ENSGALG00000011019	ROR1	38.5181	41.3832	1.77981	36.8	38.875	40.0162	15.1831	8.06486	43.0363	15.8114	11.2505	45.184
2510	2211	566	ENSGALT00000018997	ENSGALG00000026493	RALB	74.0237	62.7784	132.361	61.4997	68.6005	63.5757	49.7828	35.2165	77.6826	70.8474	66.2881	85.1502
5490	5191	566	ENSGALT00000044269	ENSGALG00000026981	NHSL1	16.3683	15.4298	38.0399	26.1945	19.9344	26.5604	5.30099	2.46909	25.6334	9.53733	6.16016	26.4852
351	52	566	ENSGALT00000035078	ENSGALG00000002595		1790.47	1829.12	3987.11	2614.92	2694.22	2940.14	5146.19	4229.22	2774.15	4772.66	5186.07	3661.87
3343	3044	565	ENSGALT00000006663	ENSGALG00000004192	SLTM	39.7007	26.7613	58.3321	44.5912	33.8394	37.1518	14.9964	9.2984	44.7909	26.2529	39.7441	36.1909
4759	4460	565	ENSGALT00000016139	ENSGALG00000009927	RAP1B	37.9825	34.5401	86.2988	30.434	37.822	37.614	28.7926	19.4938	47.4024	38.7983	35.2516	55.144
988	689	565	ENSGALT00000012485	ENSGALG00000007704	NPM3	221.861	175.366	338.842	197.004	144.359	141.217	271.983	237.801	200.127	157.342	168.628	214.412
4661	4362	564.751	ENSGALT00000045705	ENSGALG00000026111	SAAL1	36.0241	32.4572	66.586	31.104	30.623	30.2916	21.4604	15.6955	38.0668	28.8874	22.5198	40.8532
2164	1865	564	ENSGALT00000004199	ENSGALG00000002666	RAB11FIP3	50.1365	39.0428	69.5037	72.6517	52.6982	59.9166	16.7563	10.0795	62.3966	18.181	14.2884	51.6775
1445	1146	564	ENSGALT00000021998	ENSGALG00000013507	MSL1	104.871	90.939	170.043	118.233	110.706	150.588	83.1104	58.6237	154.169	86.9575	59.9924	123.17
1513	1214	564	ENSGALT00000007708	ENSGALG00000004825	HDAC8	115.917	101.59	226.807	111.611	135.837	159.069	125.194	103.378	166.119	125.097	118.971	184.825
8220	7921	564	ENSGALT00000021113	ENSGALG00000012944	DENND5B	16.4693	9.88207	35.1108	17.1058	11.4533	16.6821	9.93722	7.48376	21.2573	16.6004	13.9278	22.5705
3512	3213	564	ENSGALT00000011020	ENSGALG00000006817	CTNNBL1	45.708	32.5066	67.9757	42.171	41.1773	38.0628	30.407	29.6193	47.8107	38.5466	30.521	44.0105
8550	8251	564	ENSGALT00000000296	ENSGALG00000000220	APC	14.1778	9.79019	0.755094	16.4217	13.0569	12.6077	3.51602	2.21359	17.6823	5.57582	4.45691	12.5316
5188	4889	563.719	ENSGALT00000015067	ENSGALG00000009257	PLRG1	26.6124	20.9911	45.3285	27.7005	22.0312	23.2405	17.9028	14.441	27.2415	24.39	21.6184	29.7546
4888	4589	563	ENSGALT00000000498	ENSGALG00000000366	RPS6KA1	32.7292	24.3959	49.5921	29.4738	31.1471	30.1835	21.336	14.6632	43.3153	19.669	17.1884	33.9699
2993	2694	562.774	ENSGALT00000000552	ENSGALG00000000405	R3HCC1	47.4959	44.603	73.5717	50.186	46.5018	44.7238	35.8863	25.1976	57.7031	32.2076	31.4461	49.5519
2574	2275	562	ENSGALT00000017589	ENSGALG00000010818	PPAP2B	61.3876	73.3148	3.65145	59.3472	62.5167	60.7289	55.8835	41.6437	66.4206	49.0517	44.0421	72.7196
6953	6654	562	ENSGALT00000025304	ENSGALG00000015689	KIAA0368	17.5204	12.1057	0.936321	20.2908	13.2081	19.4116	5.80249	2.40777	26.088	7.75139	5.04602	18.9227
1172	873	562	ENSGALT00000014724	ENSGALG00000009045	EBNA1BP2	129.568	105.563	213.108	154.656	129.088	113.4	117.286	113.171	141.256	160.832	169.105	150.676
6923	6624	561	ENSGALT00000027040	ENSGALG00000016747	UBE3A	21.3757	15.0804	39.0711	20.3464	17.1022	19.2594	11.7606	7.37073	24.1522	15.3567	14.1607	24.7624
6485	6186	561	ENSGALT00000005933	ENSGALG00000003739	SALL1	7.97824	8.0557	10.3793	21.787	15.0476	7.83007	5.34491	5.78418	8.37639	7.95181	30.3266	6.93131
1717	1418	561	ENSGALT00000001256	ENSGALG00000000857	NMT1	88.5174	68.5206	99.9569	95.0456	77.3077	78.1551	68.2213	56.1914	83.6312	69.9406	68.7807	67.5665
848	549	561	ENSGALT00000026468	ENSGALG00000016410	EIF1AY	292.772	200.605	534.636	245.491	235.825	259.651	162.219	134.63	307.229	265.028	223.279	351.567
1581	1282	560	ENSGALT00000010024	ENSGALG00000006209	SMARCD1	88.8556	58.2177	68.9823	104.941	82.0074	76.7796	31.1152	17.496	87.8365	39.9839	27.022	82.1831
4906	4607	560	ENSGALT00000019996	ENSGALG00000012246	R3HDM1	28.0557	22.1767	49.774	29.2022	26.6152	34.1082	15.789	11.4761	34.0142	18.9011	12.0311	31.0506
924	625	560	ENSGALT00000006360	ENSGALG00000003991	MRTO4	200.828	198.784	276.071	215.255	193.918	188.195	205.634	237.201	176.311	185.68	201.244	225.339
1302	1003	560	ENSGALT00000025421	ENSGALG00000015764	FABP5	46.413	63.0686	126.476	134.132	132.849	211.736	97.6181	104.786	151.521	203.789	217.858	203.467
2133	1834	560	ENSGALT00000045530	ENSGALG00000026833	BOP1	60.5844	46.2785	33.971	73.3557	56.1653	84.6371	37.6846	27.6631	82.655	35.9351	29.3504	59.2061
4226	3927	560	ENSGALT00000005373	ENSGALG00000003398	ADAM9	30.638	34.8823	54.4707	34.2588	27.2532	34.857	18.0885	14.3608	39.7567	18.6878	16.9645	37.6995
1348	1049	559	ENSGALT00000019519	ENSGALG00000011967	MAD2L1	137.202	116.701	220.247	128.021	104.051	125.427	135.227	117.907	138.069	185.141	153.943	159.94
2081	1782	559	ENSGALT00000040739	ENSGALG00000004713	LAS1L	71.3346	61.9303	107.121	75.3615	62.9748	69.2642	50.5154	39.8585	70.122	64.8554	68.1897	77.8618
1485	1186	559	ENSGALT00000018464	ENSGALG00000011318	DNPEP	111.681	107.634	160.806	113.233	116.135	103.833	127.7	122.119	103.815	80.5349	72.7984	135.866
3344	3045	559	ENSGALT00000044645	ENSGALG00000028291	BCAR1	43.2793	40.2035	66.0426	44.1032	46.0096	44.4652	43.6435	34.5156	50.5119	26.767	29.2295	45.7833
2579	2280	558	ENSGALT00000007178	ENSGALG00000004506	URI1	58.0938	48.0042	92.0727	58.7956	56.4732	51.0917	45.0953	30.0283	58.3609	55.1582	43.0105	58.331
1589	1290	558	ENSGALT00000041219	ENSGALG00000000615	SNRNP40	110.536	98.0741	183.393	103.918	100.363	116.541	97.2313	72.1167	131.873	133.276	91.718	153.689
2581	2282	558	ENSGALT00000006179	ENSGALG00000003883	MTMR10	48.5152	39.8854	92.7504	58.7441	40.9978	51.5434	12.1052	3.7912	67.4431	11.9986	6.53934	58.0582
1912	1613	558	ENSGALT00000015895	ENSGALG00000009774	ELF2	70.3737	53.3245	116.091	83.1085	70.1588	90.57	31.673	20.1301	97.8083	54.0834	32.0501	90.45
1805	1506	558	ENSGALT00000038359	ENSGALG00000023314		77.0565	63.7613	68.7197	89.0133	71.8491	78.3374	74.6456	57.9434	67.4677	62.9997	82.8099	58.0335
1299	1000	557.759	ENSGALT00000015382	ENSGALG00000009451	PPID	120.338	97.7369	220.722	133.996	132.172	163.942	109.534	88.9458	165.096	189.692	182.363	181.722
7005	6706	557	ENSGALT00000045512	ENSGALG00000029100	TRMT1L	22.3373	17.5088	21.0587	19.9543	15.8184	16.7584	10.5289	6.37094	21.6554	10.6111	13.5107	17.418
3221	2922	557	ENSGALT00000010668	ENSGALG00000006609	EPHB1	28.9376	30.6042	1.00815	45.7952	42.8948	46.3544	9.85535	5.70232	36.5335	11.7132	9.4845	44.6383
7257	6958	557	ENSGALT00000010400	ENSGALG00000006445	ARNT2	20.2478	13.9968	36.8024	19.2316	17.9772	20.0658	8.18551	4.4056	22.403	11.508	9.11494	22.2933
6973	6674	556.037	ENSGALT00000019841	ENSGALG00000012147	DDX18	21.3114	14.8622	39.1328	20.0153	17.6008	23.7309	15.885	10.3844	23.2867	20.1083	17.4085	27.0389
7215	6916	556	ENSGALT00000008180	ENSGALG00000005102	CDH4	9.70126	11.625	15.4546	19.3137	16.6704	10.9175	5.01207	5.82229	8.32936	5.43218	10.9427	7.97364
4159	3860	555.446	ENSGALT00000043771	ENSGALG00000028683	SSR3	50.323	54.909	2.19425	34.5701	44.3314	46.8423	51.7101	45.1712	52.1282	61.8651	55.0706	55.4451
3753	3454	555	ENSGALT00000024382	ENSGALG00000015112	ZNF521	38.0776	24.1776	84.4272	38.6026	32.6954	53.3463	14.6368	6.55572	62.6054	21.6156	14.8129	50.8817
3648	3349	555	ENSGALT00000015190	ENSGALG00000009327	SP3	39.6299	32.0019	83.8703	39.8129	39.8579	39.3082	19.3632	11.1625	50.0757	29.4709	42.9675	53.4778
3370	3071	555	ENSGALT00000040594	ENSGALG00000021251	DDX6	42.2618	25.2664	61.6513	43.4169	27.1566	30.9221	11.7041	2.36503	45.214	16.1731	10.7598	28.5416
4712	4413	554.698	ENSGALT00000001634	ENSGALG00000001688	38596	25.5849	22.8433	35.4588	30.1973	30.652	28.4944	15.6098	9.85071	30.3438	13.6844	9.32426	27.8056
6186	5887	554	ENSGALT00000016545	ENSGALG00000010177	ZFC3H1	18.5116	13.2191	25.8992	22.6079	13.5645	15.3729	6.50413	3.08434	17.3414	6.94955	4.70761	17.5531
2091	1792	553	ENSGALT00000040026	ENSGALG00000002147	SIKE1	81.4319	69.3304	156.935	74.1366	86.4862	81.6811	70.6482	47.3845	100.638	98.0728	106.175	112.083
1404	1105	553	ENSGALT00000014159	ENSGALG00000008700	PDCD4	114.436	90.4007	184.81	120.229	104.765	106.509	66.0211	54.226	122.602	94.9381	85.3694	136.096
2350	2051	553	ENSGALT00000040414	ENSGALG00000023981	LMF2	64.6451	82.4314	82.7767	64.7746	65.428	53.6543	59.8027	45.2024	63.4656	31.5121	32.2216	57.7829
3956	3657	553	ENSGALT00000026845	ENSGALG00000016630	EXTL3	32.1341	28.7466	53.6652	36.3283	31.2035	33.9644	16.8283	11.5074	35.3304	15.1921	11.9503	38.8055
2615	2316	553	ENSGALT00000024965	ENSGALG00000015479	ASPH	51.8345	43.4263	91.7235	57.363	38.6618	57.0854	12.4341	5.76472	77.7438	31.3432	22.3216	57.5882
2982	2683	552	ENSGALT00000010574	ENSGALG00000006546	TAPA1	42.0099	52.752	51.3449	49.427	45.9654	38.3235	34.4657	28.4638	34.9933	31.6245	31.5841	37.8783
1702	1403	552	ENSGALT00000004257	ENSGALG00000002701	DNAJC9	64.0792	54.4943	130.753	94.5207	71.0617	126.335	75.9445	58.9999	105.777	93.6082	80.9121	103.628
1906	1607	551.814	ENSGALT00000039585	ENSGALG00000001756	ATP5A1W	95.6184	87.6878	16.9636	82.494	83.9311	83.3234	70.6215	45.9499	60.5347	67.8754	63.6947	118.273
4205	3906	551.579	ENSGALT00000004975	ENSGALG00000003147	TRPC4AP	37.6495	31.0684	72.2656	33.9251	34.9754	37.4791	23.2273	16.8078	49.9566	19.7246	13.4871	45.4321
3659	3360	551	ENSGALT00000026630	ENSGALG00000016506	ZNF512	37.7137	29.7977	65.9804	39.3965	35.4382	39.2006	17.3635	10.2358	45.4605	19.9936	16.0204	39.9206
7219	6920	551	ENSGALT00000044548	ENSGALG00000026822	WDR81	17.8685	14.9615	25.5093	19.1289	15.7048	15.9332	10.1108	7.88718	17.7088	6.2342	7.39361	14.6586
2714	2415	551	ENSGALT00000046149	ENSGALG00000026940	TTYH2	47.7212	57.3812	82.8411	54.8125	47.7401	50.3762	47.3883	34.5415	59.3337	30.7175	27.1444	65.9901
7239	6940	550	ENSGALT00000027884	ENSGALG00000017249	PCF11	16.9714	14.7544	31.2462	19.0392	16.9191	17.8157	7.26926	4.64788	20.7723	10.9185	9.06179	21.1591
3171	2872	550	ENSGALT00000013309	ENSGALG00000008179	NT5C2	42.8679	37.6338	61.705	46.007	38.5806	46.182	37.2111	26.0328	53.8569	24.0005	22.2684	44.0614
2405	2106	550	ENSGALT00000001181	ENSGALG00000000811	IST1	72.5841	65.044	82.8337	62.7408	62.8218	55.0776	57.0254	42.8047	57.7762	46.0338	42.262	62.3096
3716	3417	550	ENSGALT00000036762	ENSGALG00000015983	GART	36.421	23.041	70.1978	38.669	32.0123	35.4381	23.7535	13.5035	38.9132	24.5052	20.9002	42.3084
1274	975	550	ENSGALT00000008812	ENSGALG00000005487	CCDC12	123.674	105.955	192.056	135.52	116.795	154.193	121.972	109.986	167.352	122.618	101.125	150.415
1467	1168	549	ENSGALT00000007055	ENSGALG00000004431	SAR1A	127.449	125.462	170.1	112.921	128.646	112.466	148.845	121.806	123.837	121.301	115.443	129.242
2667	2368	549	ENSGALT00000001298	ENSGALG00000000884	CXXC5	42.4159	28.9237	63.5101	55.6975	47.8895	66.6872	34.9067	29.9047	41.6449	50.0832	45.6884	50.3147
1447	1148	549	ENSGALT00000004582	ENSGALG00000002903		111.776	94.3484	235.173	114.888	114.217	193.628	112.231	77.9667	195.59	168.62	142.524	198.976
2526	2227	548.922	ENSGALT00000015253	ENSGALG00000009365	CYP51A1	60.8786	75.8392	89.5727	59.2156	49.7468	44.5758	43.6869	37.738	51.0545	71.1571	59.889	52.8773
1471	1172	548	ENSGALT00000018142	ENSGALG00000011128	PSMD14	130.884	112.026	207.765	112.331	127.199	93.6534	130.591	88.1264	118.475	122.517	136.422	156.105
2962	2663	548	ENSGALT00000009960	ENSGALG00000006169	LIMA1	42.676	31.8718	34.8336	49.4373	36.5516	38.0795	12.6963	7.33985	42.6479	20.7432	16.6111	37.8778
4559	4260	547.122	ENSGALT00000006432	ENSGALG00000004040	MFAP3	31.2287	38.2527	53.1853	30.8546	28.347	30.3598	19.5251	12.6564	36.5847	20.5177	15.6384	30.8582
1992	1693	547	ENSGALT00000013886	ENSGALG00000008523	XPNPEP1	81.8604	56.4497	124.099	77.6204	72.2859	67.7188	48.824	33.7523	89.0259	58.2978	51.3124	82.5526
2700	2401	547	ENSGALT00000006635	ENSGALG00000004174	VPS26A	57.4438	44.353	115.039	54.7319	54.2176	61.3466	45.0437	31.8958	73.9466	63.2519	55.4931	81.1775
387	88	547	ENSGALT00000040525	ENSGALG00000028409	SNRPG	1632.48	1652.29	1398.27	1493.31	1132.95	1099.23	1736.81	1514.74	798.254	2404.14	2561.82	1089.46
7225	6926	546.563	ENSGALT00000007191	ENSGALG00000004515	KNTC1	19.1581	13.5787	32.0501	18.9585	13.1803	14.4771	8.43121	5.01223	18.4724	12.4422	9.13766	18.7356
1744	1445	546.441	ENSGALT00000037849	ENSGALG00000020590	CCDC101	76.847	74.2741	2.86608	90.8492	88.0855	132.471	82.7501	63.5039	122.588	94.2477	81.8307	109.642
3793	3494	546	ENSGALT00000017964	ENSGALG00000011026	RAVER2	32.9842	27.2873	2.22892	37.5418	34.6201	39.4807	20.0859	13.7561	46.3682	21.8693	19.3719	38.6611
2583	2284	546	ENSGALT00000019958	ENSGALG00000012222	RAP1GDS1	51.5095	43.1381	93.5785	57.4304	54.409	52.9865	41.8409	36.9903	55.4281	48.6493	42.0018	67.2276
1254	955	546	ENSGALT00000026351	ENSGALG00000016336	NDUFB9	107.688	94.1159	155.666	137.352	111.324	93.8749	119.612	128.282	93.8652	181.361	153.469	128.07
3562	3263	545	ENSGALT00000007232	ENSGALG00000004542	ZMYND8	38.2626	21.4087	47.0448	40.1259	24.9071	28.9723	8.56393	2.7496	33.8891	18.1486	12.4133	25.8544
4677	4378	545	ENSGALT00000005391	ENSGALG00000003409	SOGA1	21.6625	17.6715	39.4907	29.9065	21.2079	25.5565	5.79816	2.17131	35.9697	4.32702	2.19123	23.5455
3339	3040	545	ENSGALT00000011246	ENSGALG00000006939	PFKP	47.256	46.0332	62.5647	43.0694	48.2613	50.2454	35.8914	28.6697	55.8639	39.3787	40.673	50.0099
2847	2548	545	ENSGALT00000027144	ENSGALG00000016813	CHAMP1	56.3285	48.7599	92.7804	51.3857	48.0299	53.9165	28.3804	15.5938	65.8935	30.9884	20.7075	59.0956
3457	3158	544	ENSGALT00000027267	ENSGALG00000016878	TM9SF2	48.996	62.1104	102.205	41.384	43.69	44.4213	35.7662	24.5884	55.8848	38.2098	30.04	65.7437
7548	7249	544	ENSGALT00000038202	ENSGALG00000008180	SPG11	17.7936	12.8699	29.4845	18.0288	14.5358	15.337	8.07761	6.15893	20.0732	8.01553	6.32283	17.0904
1880	1581	544	ENSGALT00000007158	ENSGALG00000004493	RSRC2	70.7013	53.1085	92.388	82.6632	69.9351	66.5141	39.8698	31.0766	69.3328	56.8898	52.9248	64.1605
5184	4885	544	ENSGALT00000010237	ENSGALG00000006332	RBM17	26.5956	18.9117	42.4421	26.7534	23.2628	27.7023	16.8118	15.0866	29.4711	21.6382	20.9473	30.6687
3857	3558	543	ENSGALT00000002511	ENSGALG00000001644	SIN3A	33.853	21.7441	39.3503	36.664	24.9004	30.8891	10.5218	4.89315	35.3913	11.5881	8.08871	26.7501
4413	4114	543	ENSGALT00000032683	ENSGALG00000007037	PPP6R3	28.5645	19.3586	56.7483	31.7089	27.3353	31.5341	14.2589	10.0993	39.5914	24.3391	23.8366	35.3403
1067	768	543	ENSGALT00000021968	ENSGALG00000013483	NAA40	151.971	132.439	55.4343	169.857	111.36	157.487	157.902	131.842	124.51	138.255	111.033	140.397
11335	11036	542	ENSGALT00000007092	ENSGALG00000004455	USP34	12.0503	10.3711	22.7071	11.7987	9.505	10.6452	4.44565	3.07767	13.5523	5.76987	3.62194	13.0366
2171	1872	542	ENSGALT00000005530	ENSGALG00000003495	ALDH9A1	72.3941	56.0357	98.6424	69.5567	57.0445	90.2955	39.2556	26.3028	105.461	52.2982	41.566	77.1588
6066	5767	541.412	ENSGALT00000027564	ENSGALG00000017064	RFC3	28.2817	17.785	60.5578	22.554	19.1498	22.1933	18.9607	12.4217	28.2061	25.6552	23.1896	32.9574
2691	2392	541	ENSGALT00000014296	ENSGALG00000008793	SEC23B	55.5967	51.1788	91.4515	54.3352	49.6807	67.5871	45.6591	34.4271	83.5029	43.7907	46.5668	68.1052
3323	3024	541	ENSGALT00000015980	ENSGALG00000009828	PPP2R5A	40.7132	34.5382	71.0796	42.9795	46.0166	43.6031	37.1394	23.4527	43.3003	43.0615	36.4821	47.4513
3556	3257	541	ENSGALT00000012473	ENSGALG00000007697	MGEA5	42.6332	32.5565	113.339	39.9048	36.704	46.0715	13.4917	5.93565	71.5174	18.0354	11.4544	63.8813
577	278	541	ENSGALT00000025402	ENSGALG00000015751	ATP5J	511.479	504.203	862.204	467.518	579.59	642.166	935.357	1132.25	486.279	903.035	1058.24	757.976
1798	1499	540	ENSGALT00000001434	ENSGALG00000000970	STT3A	78.2172	59.9604	131.847	86.5441	75.0216	125.141	73.4289	66.4082	111.684	80.2856	61.5086	107.834
4987	4688	540	ENSGALT00000019569	ENSGALG00000011995	CLASP2	20.9129	15.1439	28.7208	27.6727	17.3361	13.5948	8.66814	2.80236	17.3307	11.7831	10.0043	12.6805
718	419	540	ENSGALT00000043683	ENSGALG00000026300		306.887	331.272	7.02166	309.617	306.737	501.952	594.885	585.282	553.161	436.919	445.19	514.074
2436	2137	540	ENSGALT00000027160	ENSGALG00000016823		71.2815	57.7117	138.888	60.7064	71.0865	77.806	46.7154	28.9388	93.9637	72.2578	58.3583	96.1481
1678	1379	539.874	ENSGALT00000023607	ENSGALG00000014646	SYT11	88.2157	93.8896	126.378	94.0532	71.2705	94.4358	43.2351	33.2277	110.837	55.2859	44.029	92.0862
6176	5877	539.806	ENSGALT00000022129	ENSGALG00000013602	PCM1	21.6583	13.9732	47.6791	22.0662	16.6734	22.3828	8.24163	6.04693	36.0313	18.9454	14.4661	25.2782
2505	2206	539	ENSGALT00000040187	ENSGALG00000006309	SMAD5	49.3401	34.8643	78.1374	58.6987	44.5522	42.3729	10.8301	2.95346	50.5206	24.9682	20.0523	43.9473
2743	2444	539	ENSGALT00000017158	ENSGALG00000010542	PAPSS1	57.6339	53.4417	85.1154	52.9826	58.5804	56.2977	37.007	27.4014	56.8925	40.6444	31.6197	60.2389
1517	1218	539	ENSGALT00000018940	ENSGALG00000011603	MRPL3	107.98	98.267	173.063	106.313	100.282	101.163	83.1888	74.0997	109.643	130.176	134.771	131.829
3291	2992	539	ENSGALT00000020826	ENSGALG00000012763	GNPTAB	34.8626	20.5339	65.188	43.2785	29.9267	39.3122	8.12759	2.35608	47.4721	16.6001	9.61886	35.8898
3199	2900	538.147	ENSGALT00000043417	ENSGALG00000006197	CSNK2A1	48.5495	40.2764	83.0829	44.5809	47.1531	37.3187	53.0892	43.138	50.6325	56.8905	56.0842	55.9813
3052	2753	538.012	ENSGALT00000031605	ENSGALG00000023536	FZD7	28.9271	39.7297	43.224	46.9495	42.9229	42.0083	21.1643	11.678	41.627	14.8292	14.242	37.9215
5428	5129	538	ENSGALT00000043568	ENSGALG00000027283	SLC12A9	34.8748	40.2387	1.45091	25.1997	20.636	27.8617	25.744	17.1177	43.1196	14.7738	12.3653	36.0652
9089	8790	538	ENSGALT00000011986	ENSGALG00000007410	IGDCC4	15.1597	13.9272	17.0898	14.7041	9.00403	9.9333	5.60585	3.53599	12.5692	5.65045	3.51666	8.85655
6389	6090	538	ENSGALT00000002396	ENSGALG00000001577	FOXK2	20.7776	15.8638	32.2824	21.2232	21.6858	19.0116	12.9706	9.29535	20.0748	17.0692	15.3148	19.3979
3064	2765	537	ENSGALT00000002628	ENSGALG00000001712	VATB	53.4997	47.402	80.1787	46.6578	46.0548	47.0984	34.2536	24.0658	52.0674	45.886	38.7429	54.1604
6278	5979	537	ENSGALT00000010359	ENSGALG00000006418	PDPK1	22.0193	18.6863	42.4626	21.577	19.0458	22.3729	10.6318	6.52036	29.6626	13.419	11.1423	25.0572
7318	7019	536	ENSGALT00000027245	ENSGALG00000016865	TPP2	21.2986	15.5933	32.8423	18.3457	15.8536	14.9215	10.4848	7.01727	19.1775	14.6889	13.2066	18.0829
5397	5098	535	ENSGALT00000007290	ENSGALG00000004581	NDST1	23.3389	21.6923	33.2344	25.2115	22.5689	29.5869	11.1092	7.77287	32.0821	9.43028	7.21341	24.2145
2680	2381	535	ENSGALT00000024727	ENSGALG00000015320	NANS	55.9096	38.8959	2.03518	53.9809	43.1629	53.1477	35.6568	28.5751	47.699	40.3827	39.843	61.0625
4258	3959	535	ENSGALT00000018404	ENSGALG00000011280	EEA1	24.2921	15.9208	30.862	32.4649	17.6639	20.0512	4.17575	2.40111	27.712	9.73077	10.7695	17.2677
2804	2505	535	ENSGALT00000005424	ENSGALG00000003428		42.7586	30.4303	49.3973	51.3088	39.2344	41.2163	11.7514	5.58561	48.1113	11.0576	8.72304	33.602
6991	6692	534.708	ENSGALT00000017434	ENSGALG00000010714	PHF14	15.7665	12.105	30.9988	19.1958	14.5356	17.0157	8.74775	6.51195	21.6847	16.1108	22.8163	19.0598
9125	8826	534	ENSGALT00000026856	ENSGALG00000016635	MXRA5	26.8709	36.8157	30.8635	14.5353	16.6497	13.8403	9.09955	4.17506	19.6789	6.43905	2.83809	12.7541
7923	7624	534	ENSGALT00000024844	ENSGALG00000015403	EPHA3	37.4234	29.2193	88.7108	16.8269	16.1759	17.9755	17.0394	9.70862	49.8988	17.5602	17.4064	34.3908
7762	7463	534	ENSGALT00000006053	ENSGALG00000003818	CYFIP2	12.9759	7.98835	21.9373	17.1899	11.5547	16.1213	5.51649	3.83556	16.9893	10.9	7.28414	16.3207
5962	5663	533.36	ENSGALT00000005468	ENSGALG00000005870		21.1988	13.7475	26.7395	22.6266	15.5853	21.0981	12.5811	9.54357	23.5554	15.6608	10.9614	20.523
6925	6626	533	ENSGALT00000011523	ENSGALG00000007113	TNC	26.1702	44.4378	31.2642	19.3251	27.7758	19.5364	14.5675	10.3327	27.771	10.6191	6.59559	20.043
1863	1564	533	ENSGALT00000010020	ENSGALG00000006207	HM13	103.367	115.664	195.747	81.8721	79.7587	185.411	103.179	82.5651	199.277	62.8009	70.1976	150.378
1841	1542	533	ENSGALT00000029695	ENSGALG00000018810	ABHD17A	84.4269	75.406	115.937	83.0402	83.5013	75.7278	88.0507	73.9073	77.8446	48.8308	58.7565	81.8189
3136	2837	532	ENSGALT00000040347	ENSGALG00000001737	RABEP1	38.7421	30.2379	56.9761	45.0503	35.0593	36.9671	15.8651	13.5158	46.7326	32.7135	26.8638	40.3696
10024	9725	532	ENSGALT00000023835	ENSGALG00000014773	ERBB2IP	13.1124	10.3185	0.889786	13.1422	11.3694	10.6822	5.3301	2.85556	16.937	8.3483	6.35711	12.8497
2268	1969	532	ENSGALT00000022384	ENSGALG00000013784	CDT1	49.7917	38.8296	97.826	64.91	50.0347	61.4633	50.6471	48.8207	63.4134	45.6794	38.165	71.6233
4635	4336	532	ENSGALT00000010780	ENSGALG00000006663	ARHGEF12	27.9326	14.589	39.3943	29.4759	21.5223	22.309	5.09178	0.81289	33.2026	7.74659	6.14571	21.0753
2125	1826	531.761	ENSGALT00000007543	ENSGALG00000004736	STAU1	72.3018	54.1283	105.724	69.9619	58.8932	56.2062	22.9665	10.6774	55.2601	35.0697	32.8828	74.4058
4422	4123	531	ENSGALT00000005170	ENSGALG00000003267	STAT3	29.1816	26.6013	45.1652	30.9404	29.1093	29.9538	18.9101	12.357	36.4859	14.0156	10.5997	30.2935
2349	2050	531	ENSGALT00000014982	ENSGALG00000009201	CCNF	59.5364	43.1783	86.9538	62.228	44.1393	53.0933	26.8983	16.0474	63.9202	39.4482	31.4574	53.1529
4475	4176	531	ENSGALT00000006984	ENSGALG00000004379	BCL7A	33.1233	25.2829	61.3347	30.5478	32.304	26.7757	18.5934	14.2207	33.2963	34.7276	33.6926	37.2689
5177	4878	530	ENSGALT00000016143	ENSGALG00000009930	STRN3	26.0322	22.4841	53.4658	26.1023	22.5212	24.4757	14.5839	8.71462	32.1839	18.6669	13.7664	31.8536
1374	1075	529	ENSGALT00000015842	ENSGALG00000009733	SHFM1	122.717	98.6386	219.106	118.22	126.808	105.464	118.166	108.796	144.245	282.841	312.337	155.542
3367	3068	529	ENSGALT00000003918	ENSGALG00000002487	SFSWAP	40.9988	38.1221	60.3014	41.4234	40.5823	42.4238	24.5436	16.3973	48.2776	23.6607	20.8457	42.2153
3356	3057	529	ENSGALT00000003564	ENSGALG00000002272	NOC4L	45.6406	38.4826	75.1243	41.5725	48.5339	42.3911	35.7267	21.8719	44.7898	31.5569	24.0589	48.1389
2640	2341	529	ENSGALT00000012759	ENSGALG00000007861	MAGT1	57.5486	72.5115	96.1791	54.2875	50.4603	55.5683	34.1247	25.7327	64.3007	39.5767	29.1407	66.5633
4039	3740	529	ENSGALT00000026163	ENSGALG00000016226	CASK	35.2015	28.352	67.7908	33.9805	28.3001	31.0521	18.6222	12.4515	40.2997	24.0488	25.9353	36.879
5331	5032	528.451	ENSGALT00000009616	ENSGALG00000005979	OXSR1	18.5084	15.8593	29.2304	25.2296	21.0018	19.3333	13.4955	7.71663	23.0838	13.2847	10.1339	19.6034
1284	985	528	ENSGALT00000009608	ENSGALG00000005976	TCEA2	115.783	102.569	158.129	128.778	117.528	128.4	93.0134	88.2664	114.517	137.049	142.843	125.646
2736	2437	528	ENSGALT00000019110	ENSGALG00000011689	PDIA5	43.8969	43.9779	58.5163	52.0504	42.7527	43.674	27.3098	19.8979	52.0274	37.3644	28.6489	53.3016
3831	3532	528	ENSGALT00000007603	ENSGALG00000004767	ODF2	34.2155	21.8398	54.5845	35.9136	27.7593	36.8305	18.4807	12.7614	43.8204	25.1947	18.8617	36.8127
4272	3973	528	ENSGALT00000043255	ENSGALG00000028290	C1H21ORF91	51.1996	32.1875	93.2181	31.9272	26.6404	44.7021	29.0199	26.3998	62.6605	30.6922	33.2678	37.0402
1223	924	528	ENSGALT00000008350	ENSGALG00000005200	ADRM1	131.655	117.959	210.148	137.28	124.008	157.646	132.628	120.911	189.956	152.988	130.932	164.466
964	665	528	ENSGALT00000042715	ENSGALG00000027754		148.832	129	95.7704	190.747	170.53	230.864	195.511	168.324	231.436	157.276	133.84	205.223
716	417	527.168	ENSGALT00000044067	ENSGALG00000010570	BTF3L4	262.956	145.175	16.3028	303.71	247.384	280.085	74.6969	52.4039	288.678	287.647	290.593	364.046
2919	2620	527	ENSGALT00000000932	ENSGALG00000000657	TERF2	47.1947	43.9459	66.451	48.3231	43.2834	40.6235	28.5368	24.6231	42.3166	31.9596	27.6649	46.1752
1340	1041	527	ENSGALT00000001690	ENSGALG00000001121	SH3GL1	107.504	72.5699	152.116	121.62	89.6453	109.996	34.4253	20.11	125.412	43.4295	34.8137	117.065
1008	709	527	ENSGALT00000008293	ENSGALG00000005163	Mtch2	162.548	143.46	285.103	178.571	177.275	203.153	211.96	198.704	201.014	216.67	186.422	207.739
4616	4317	526	ENSGALT00000008981	ENSGALG00000005598	ZNF598	30.8673	23.6138	59.5719	29.2718	24.9554	28.0336	19.9626	12.4449	39.2049	17.0733	15.6788	34.9236
2173	1874	526	ENSGALT00000015379	ENSGALG00000009448	IFRD1	75.8757	62.4112	92.2573	67.4313	61.1439	60.6492	51.621	34.539	71.4681	85.1169	59.4385	70.1922
2582	2283	525	ENSGALT00000002203	ENSGALG00000001449	STRA6	50.0714	54.619	72.773	55.2457	53.191	57.1041	49.7078	35.4626	60.7356	22.1737	21.7104	46.8971
5564	5265	525	ENSGALT00000043862	ENSGALG00000028530	PRKACB	28.6789	25.8447	55.354	23.9556	26.8788	23.6181	17.3001	10.3056	27.0691	26.1841	22.371	35.6261
4673	4374	525	ENSGALT00000043897	ENSGALG00000027262	CAB39	32.3863	23.5141	2.13658	28.8354	30.1935	31.1653	18.7271	13.6747	43.2384	29.9165	22.7853	44.7909
2523	2224	525	ENSGALT00000044788	ENSGALG00000028635	AIF1L	66.3339	55.1472	93.9242	56.7113	67.031	56.6767	56.6854	42.3105	71.675	39.225	34.7476	71.3446
3834	3535	525	ENSGALT00000040574	ENSGALG00000024051		28.8114	21.3967	51.493	35.6792	27.2679	38.5398	11.5305	4.52254	40.999	11.6166	4.32127	36.1748
1805	1506	524.534	ENSGALT00000003204	ENSGALG00000002060	TAF15	119.043	92.143	169.488	83.6746	90.162	140.512	64.9652	39.9817	120.126	90.2403	92.8154	144.756
5378	5079	524	ENSGALT00000027647	ENSGALG00000017111	NUPL1	22.3494	16.7109	50.0551	24.7855	18.839	25.2499	13.7127	7.00282	31.4232	16.8625	14.5857	32.0249
9858	9559	524	ENSGALT00000028013	ENSGALG00000017334	DCHS1	14.0099	10.0454	17.1814	13.1693	7.88423	8.72674	1.31661	0.558682	12.6685	0.682793	0.278772	9.40768
2158	1859	524	ENSGALT00000010875	ENSGALG00000006723		90.4079	71.3606	131.078	67.7169	63.1623	64.1478	65.9218	58.7764	84.7616	100.447	95.181	78.3788
4532	4233	523.891	ENSGALT00000043098	ENSGALG00000016886	FARP1	25.5586	30.246	43.1587	29.7329	36.5968	27.5255	21.1188	16.9278	30.7086	21.807	15.4155	27.0043
1971	1672	523	ENSGALT00000007832	ENSGALG00000004899	PEPD	63.5027	53.4842	120.275	75.1469	68.8135	83.1387	54.7318	47.9745	99.3201	73.4067	65.0258	97.1302
5980	5681	523	ENSGALT00000025319	ENSGALG00000015699	NELFA	22.1882	19.8267	38.9324	22.1168	17.5081	19.7073	11.0581	7.1068	21.9787	12.4416	9.28757	21.9633
5548	5249	523	ENSGALT00000017211	ENSGALG00000010576	GTF2A1	24.1922	19.0742	37.158	23.937	22.6848	21.0594	12.3745	7.7324	25.6626	18.1664	13.6057	21.9878
2421	2122	522.911	ENSGALT00000038756	ENSGALG00000009303	avenaII	37.3862	18.0544	73.0022	59.2008	28.4798	49.1048	6.503	2.90571	61.6336	20.4134	12.3702	40.3666
3738	3439	522.332	ENSGALT00000042736	ENSGALG00000028295	MFAP1	28.202	22.4006	42.5721	36.4888	27.615	39.7446	25.9643	20.2802	36.6318	23.1279	18.6965	36.0775
3810	3511	522	ENSGALT00000018652	ENSGALG00000011438	TNKS	30.1271	16.9801	63.6849	35.7178	24.4262	41.2258	7.74637	3.07254	53.4266	12.8767	9.71495	43.6974
4331	4032	521.433	ENSGALT00000033133	ENSGALG00000008542	ADD3	40.1129	46.3143	85.5913	31.0687	40.6429	33.1831	26.7645	12.7651	46.7747	34.627	33.696	56.9013
2080	1781	521.263	ENSGALT00000009080	ENSGALG00000005659	SNX12	82.5938	75.4992	112.934	70.3134	82.8405	86.1862	70.8018	54.8022	92.651	68.5563	61.8413	91.4223
4164	3865	521.143	ENSGALT00000020029	ENSGALG00000012263	NEMF	30.2101	21.8943	44.8764	32.3931	26.9272	32.2777	17.7416	17.2138	33.9974	25.3435	26.5405	31.2198
4050	3751	521	ENSGALT00000004462	ENSGALG00000002827	GPS1	29.4085	25.1144	43.8772	33.3685	24.501	25.9582	21.8091	17.7682	32.8243	22.9173	18.7551	30.9543
3407	3108	520	ENSGALT00000000326	ENSGALG00000000247	WDR36	40.9004	38.8761	2.50574	40.1946	37.0954	42.9031	33.5962	29.4858	59.9506	38.4147	34.6387	48.0815
2120	1821	520	ENSGALT00000005068	ENSGALG00000003199	Mlx	69.8801	62.8532	129.536	68.6023	69.4104	82.908	56.6962	34.4299	91.7763	61.3684	46.2422	99.5665
588	289	520	ENSGALT00000042625	ENSGALG00000025711	H3F3C	390.932	330.69	460.504	432.266	426.73	478.056	435.422	307.861	461.093	426.895	359.607	422.114
3182	2883	520	ENSGALT00000010782	ENSGALG00000006665	GALNT6	4.53416	4.49883	2.52121	43.3315	33.1888	38.7844	5.2533	4.70507	9.20408	10.933	9.42794	20.466
2082	1783	520	ENSGALT00000013905	ENSGALG00000008532	COBRA1	68.5266	61.5127	116.864	70.0644	60.5544	68.1928	57.3662	45.2275	70.5156	68.7475	64.8634	83.4576
14579	14280	519	ENSGALT00000006827	ENSGALG00000004291	VPS13D	11.3118	6.80407	12.6525	8.73141	5.75747	5.45982	2.75605	1.92974	6.68283	3.79025	2.64985	6.46134
1304	1005	519	ENSGALT00000018851	ENSGALG00000011559	ACTR6	130.392	116.15	287.569	124.064	134.303	110.835	137.115	111.804	123.794	212.091	194.091	200.972
2707	2408	518	ENSGALT00000023672	ENSGALG00000014688	ZYX	62.7054	70.5884	82.2913	51.6795	69.4637	44.1411	50.2279	42.2711	54.2168	41.6487	37.4043	55.5718
945	646	518	ENSGALT00000011612	ENSGALG00000007170	SNRPA1	206.482	158.86	326.838	192.638	197.489	171.335	228.833	164.677	211.357	273.532	401.78	251.396
3127	2828	518	ENSGALT00000003959	ENSGALG00000002510	IP6K1	36.1297	31.3801	59.0545	44.0044	40.5176	42.243	27.9088	19.7151	44.4246	24.7117	18.6572	43.763
2358	2059	518	ENSGALT00000031736	ENSGALG00000014870	HSF2	57.9805	46.8575	97.0802	60.4392	46.7002	56.0941	35.7422	24.0696	77.3719	48.4762	35.2025	66.2198
1115	816	518	ENSGALT00000018395	ENSGALG00000011274	DCN	239.476	238.143	228.63	152.505	203.828	116.375	92.5405	86.2586	166.733	151.387	131.933	161.666
2690	2391	517.045	ENSGALT00000017313	ENSGALG00000010641	SCCPDH	50.623	55.5156	93.3111	51.951	42.8914	49.9361	43.6008	28.1966	53.5043	44.3363	36.4745	61.886
4306	4007	517	ENSGALT00000007743	ENSGALG00000004850	ZMIZ1	25.4658	15.2757	46.8182	30.9968	20.6952	25.1834	4.47176	1.38609	33.1835	6.39623	4.92123	28.9293
3105	2806	517	ENSGALT00000033324	ENSGALG00000020793	UBE2E3	45.6351	39.0867	75.0599	44.2638	43.9009	42.0114	37.9654	26.1883	44.1345	44.1377	31.1493	56.1862
1209	910	517	ENSGALT00000008017	ENSGALG00000005006	UBA2	120.928	81.2665	245.522	136.488	109.56	162.872	50.6327	20.0707	190.44	90.0914	68.5229	170.193
3594	3295	517	ENSGALT00000023719	ENSGALG00000014709	SKIV2L2	39.1741	27.3821	2.46858	37.6947	30.0996	32.8718	23.5938	20.0651	43.8445	34.0605	33.1581	39.2686
4417	4118	517	ENSGALT00000005216	ENSGALG00000003293	MBTPS1	36.0516	32.8776	57.3656	30.1613	27.8824	32.8276	19.4769	15.3029	42.7631	23.0784	16.9542	36.2735
1440	1141	517	ENSGALT00000018495	ENSGALG00000011334	FAM134A	102.291	111.28	154.255	108.855	106.636	113.265	77.6791	58.1317	132.857	84.2692	75.2024	115.008
3003	2704	517	ENSGALT00000000557	ENSGALG00000000409	CHMP7	46.1726	42.16	94.532	45.9335	47.5306	49.2084	48.0035	32.3507	61.4853	49.5116	48.6835	65.9067
2064	1765	516	ENSGALT00000016546	ENSGALG00000010178	PUM3	56.9825	41.6416	5.0007	70.2345	53.1406	62.3083	42.9044	37.5192	88.1824	66.5624	67.3367	75.4945
908	609	515.098	ENSGALT00000039129	ENSGALG00000005446	GCSH	193.808	166.836	335.173	203.197	199.914	248.109	218.475	198.908	164.811	328.457	332.102	302.004
1823	1524	515	ENSGALT00000008561	ENSGALG00000005337	SNX2	70.7199	60.1713	3.86099	81.1835	70.8455	90.9338	46.9598	34.6918	94.2762	80.6399	73.7886	99.7573
2328	2029	515	ENSGALT00000002104	ENSGALG00000001382	CDC2L1	44.7693	35.2141	60.4741	60.9776	38.8907	46.8371	20.9739	14.0025	49.8868	29.3432	26.7923	40.4253
384	85	515	ENSGALT00000012762	ENSGALG00000007863		1539.45	1453.62	2139.88	1455.57	1487.02	1446.27	1624.95	1843.39	1240.78	2601.36	3135.04	1748.41
3511	3212	514	ENSGALT00000005134	ENSGALG00000003247	NFYA	40.8634	34.9253	58.4601	38.4444	36.1885	36.9062	23.41	14.9971	37.0408	25.3258	19.9112	41.0512
1395	1096	513	ENSGALT00000044607	ENSGALG00000028998	XPA	103.327	95.9181	3.94761	112.448	103.038	106.609	109.284	92.2883	133.029	106.321	89.4744	138.021
1500	1201	513	ENSGALT00000027390	ENSGALG00000016946	SUGT1	107.621	96.6266	187.761	102.617	113.505	98.9981	90.6716	73.3699	101.208	120.619	134.903	138.065
2533	2234	513	ENSGALT00000045229	ENSGALG00000026268	SEC22B	58.3944	48.9927	89.9402	55.167	56.367	52.2388	43.4935	34.3758	60.0809	41.8285	45.3275	56.0502
6019	5720	513	ENSGALT00000024811	ENSGALG00000015377	PHLDB2	17.8161	17.4638	26.8067	21.546	18.4213	16.1808	8.0552	5.63921	19.5178	14.0266	10.9014	17.9661
2467	2168	513	ENSGALT00000040382	ENSGALG00000001630		58.6339	47.9652	97.4679	56.8465	47.6215	52.2286	41.0786	36.1613	69.7432	42.1473	30.9744	64.8157
1359	1060	512	ENSGALT00000005085	ENSGALG00000003210	SURF6	83.6818	65.4732	177.961	116.04	100.743	126.931	73.8548	69.6273	131.266	126.602	172.457	134.714
1177	878	512	ENSGALT00000015631	ENSGALG00000009592	SRP14	154.505	119.215	259.595	140.094	137.771	142.677	144.072	128.219	164.191	195.453	179.675	204.055
2573	2274	512	ENSGALT00000022444	ENSGALG00000007439	SLMO2	56.0181	43.628	110.961	54.091	49.3497	56.645	38.6948	23.3908	71.3296	51.8035	46.1708	82.3183
5262	4963	512	ENSGALT00000008130	ENSGALG00000005072	SCAP	23.5437	24.9416	37.207	24.784	19.4697	28.2657	11.6048	7.61844	30.7189	7.05661	4.93975	25.9308
843	544	512	ENSGALT00000044493	ENSGALG00000028204	GPX1	262.852	267.283	239.553	226.108	224.963	175.213	350.164	267.807	175.424	230.007	263.539	144.965
3704	3405	512	ENSGALT00000045665	ENSGALG00000028997	DNMT1	32.2402	23.5899	20.5338	36.1242	29.3497	34.7519	13.3752	7.3088	34.1761	11.127	6.57391	28.4679
1782	1483	512	ENSGALT00000025898	ENSGALG00000016073	DCAF13	86.7064	65.2104	135.136	82.942	70.0959	74.0133	53.9397	39.6122	93.3691	65.909	65.4066	93.4748
7578	7279	512	ENSGALT00000045202	ENSGALG00000026930	BAHCC1	14.6379	14.7863	21.9687	16.8983	16.1961	16.6844	6.86916	5.17977	17.2862	5.03006	6.44321	13.6229
2253	1954	511	ENSGALT00000018639	ENSGALG00000011429	LTA4H	70.7896	56.9447	108.851	62.8263	61.9051	61.319	53.4376	42.6907	68.8384	57.7616	59.187	78.6137
6237	5938	510	ENSGALT00000021128	ENSGALG00000012954		14.9157	8.43047	25.6185	20.6336	14.4825	15.8968	3.68216	1.54691	19.5487	4.77197	4.12866	15.3362
2717	2418	509	ENSGALT00000036901	ENSGALG00000008405	RALBP1	52.2958	37.1715	79.5891	50.5716	45.9222	47.5315	25.2306	19.5242	52.955	39.3697	61.0541	48.8035
7910	7611	509	ENSGALT00000019632	ENSGALG00000012030	QSER1	13.4772	7.9825	23.398	16.0665	10.9576	10.8952	3.39127	1.05251	13.7683	5.01981	3.85135	12.3141
2191	1892	509	ENSGALT00000011339	ENSGALG00000007005	PPP1R2	57.3171	57.1271	3.38443	64.6312	65.8067	57.9762	48.5367	33.8717	69.9212	59.1496	51.5491	78.0813
1509	1210	509	ENSGALT00000010502	ENSGALG00000006500	NDE1	91.8279	59.8014	125.006	101.06	72.4385	73.9743	53.4166	46.3427	76.5558	84.5947	75.7591	79.2858
944	645	509	ENSGALT00000034620	ENSGALG00000003795	DENR	152.207	139.35	358.737	189.585	165.195	241.097	160.068	124.527	248.486	241.377	253.671	282.18
1916	1617	509	ENSGALT00000004557	ENSGALG00000002891	ACADL	70.777	72.8935	91.7225	75.6229	68.0858	66.3909	59.7595	47.7568	79.3659	64.8773	61.964	80.6052
2139	1840	508	ENSGALT00000011621	ENSGALG00000007178	FADS2	68.2161	71.6028	103.462	66.3271	62.7873	72.7768	38.779	24.6125	84.9027	41.1819	33.0201	63.9623
4313	4014	508	ENSGALT00000014169	ENSGALG00000008707	CSRP2BP	27.814	22.7886	46.2623	30.4041	23.1899	25.3159	16.8196	9.23335	28.1015	19.8294	18.854	27.8863
1438	1139	508	ENSGALT00000032863	ENSGALG00000014788	CENPH	97.9034	77.9131	3.03886	107.148	92.5107	109.236	96.7309	93.868	103.693	140.602	124.466	99.608
2280	1981	507	ENSGALT00000018517	ENSGALG00000011340	ZRANB2	54.7421	47.4389	4.19336	61.485	57.6028	65.1303	40.1107	26.4731	66.8773	61.5548	51.9235	69.7848
2595	2296	507	ENSGALT00000014542	ENSGALG00000008944	FBXO11	50.0784	37.7592	97.9888	53.0495	43.2174	51.2291	16.9555	6.88489	62.8292	28.4962	17.6414	62.1388
2486	2187	507	ENSGALT00000002357	ENSGALG00000001551	CCNL2	55.6239	64.4038	82.0607	55.6935	56.174	41.6077	41.5508	30.5726	43.2384	31.0083	20.7139	52.7438
2770	2471	506	ENSGALT00000012618	ENSGALG00000007777	SLC39A10	40.5939	33.7958	48.4661	49.1953	25.5282	34.0744	7.76942	2.16125	38.4641	21.1309	13.5881	28.6131
5749	5450	506	ENSGALT00000023059	ENSGALG00000014258	LIMCH1	19.8735	26.9298	40.6778	22.3049	24.7092	25.8699	8.18029	7.29044	22.0427	15.1012	11.8326	24.8088
3161	2862	506	ENSGALT00000011632	ENSGALG00000007183	ERGIC2	43.0643	42.0587	65.186	42.4743	40.8617	42.4835	31.9002	27.318	51.2805	33.0952	34.8228	48.723
2741	2442	506	ENSGALT00000026321	ENSGALG00000016314	ELOVL5	60.303	75.0101	96.7369	49.7795	49.244	60.5196	37.605	26.1117	58.8358	46.0884	34.2646	57.828
5031	4732	506	ENSGALT00000005397	ENSGALG00000003412		22.9735	22.1199	29.4412	25.6892	22.1676	20.2176	14.6281	13.0012	23.4705	8.54489	6.30717	19.9798
5363	5064	505	ENSGALT00000013458	ENSGALG00000008269	ZC3H6	22.1786	16.0864	43.3684	23.9576	19.8279	28.9045	10.7626	6.9392	32.4118	18.5157	17.0495	28.9852
5044	4745	505	ENSGALT00000015788	ENSGALG00000008497	SLC38A2	31.7375	45.5448	57.4488	25.5682	31.3679	26.0721	20.4323	15.104	36.9497	19.9282	13.9276	35.2145
2739	2440	505	ENSGALT00000014692	ENSGALG00000009031	SESTD1	41.3283	34.2252	87.8084	49.7218	48.2192	49.773	29.4181	20.3112	60.0308	46.2566	42.5928	69.098
1194	895	505	ENSGALT00000018225	ENSGALG00000011178	ENOPH1	119.378	99.4084	175.77	135.554	97.1417	128.098	93.429	61.5792	140.48	75.0597	70.2668	154.533
4423	4124	504.808	ENSGALT00000045826	ENSGALG00000014916	SPINZ	32.709	33.2364	1.97894	29.4072	37.6399	27.7144	20.2854	13.3151	36.9127	25.4345	23.5345	36.8447
4491	4192	504.241	ENSGALT00000015372	ENSGALG00000009442	ETFDH	29.8095	31.0745	52.7454	28.8976	23.1946	29.0705	18.7011	12.8477	33.7451	20.8254	18.9215	33.4229
6252	5953	504.14	ENSGALT00000004359	ENSGALG00000002761	SIRT1	22.3393	15.0229	34.9921	20.3451	20.7249	18.7102	9.54334	7.41617	20.222	13.997	11.7612	20.5906
3734	3435	504	ENSGALT00000023056	ENSGALG00000014256	M6PR	33.5896	35.3077	61.8191	35.2492	29.6436	32.4693	24.8711	15.3606	37.7542	28.455	23.118	38.1468
3027	2728	504	ENSGALT00000002395	ENSGALG00000001576	HIRA	44.3973	32.0299	78.6651	44.3845	36.1138	49.8657	19.9786	9.55328	66.25	27.2515	17.7782	55.0573
3188	2889	504	ENSGALT00000033368	ENSGALG00000020813	CCDC50	48.2947	26.4643	2.93531	41.911	20.935	33.3113	7.12522	0.998213	58.216	8.65106	6.82568	34.3456
3639	3340	504	ENSGALT00000005039	ENSGALG00000003177	BRD8	33.3469	26.706	51.0381	36.2518	34.5894	42.6156	18.2019	11.9281	41.197	22.83	19.7864	37.7739
8394	8095	504	ENSGALT00000004194	ENSGALG00000002663	ATR	13.6601	10.5129	0.705508	14.9575	10.3608	11.2848	6.02127	3.93194	16.8668	8.37742	7.57134	15.3199
3859	3560	503.036	ENSGALT00000023620	ENSGALG00000014656	RPRD2	33.4918	22.6137	50.0505	33.9465	24.3285	29.2136	14.402	8.22068	33.1611	12.5267	8.38358	31.6892
1933	1634	503	ENSGALT00000010016	ENSGALG00000006206	SPG7	63.8366	65.1723	77.7408	73.9539	50.75	67.0003	33.2895	19.2177	85.2722	36.534	28.7027	80.6181
3282	2983	503	ENSGALT00000043181	ENSGALG00000027936	DAPK3	39.5736	37.3777	49.3721	40.5098	40.3922	38.6474	27.138	20.6958	47.0331	21.0795	17.6878	33.2845
2263	1964	503	ENSGALT00000010111	ENSGALG00000006256		43.7381	34.1783	63.621	61.5279	45.7112	58.9877	11.9473	6.90668	60.0374	22.1278	19.8095	45.2408
2867	2568	503	ENSGALT00000007615	ENSGALG00000004773		45.1897	39.4307	64.0226	47.0564	50.5998	43.5142	30.9006	23.458	47.6825	38.3719	34.6588	46.2237
3139	2840	502	ENSGALT00000015273	ENSGALG00000008676	RRBP1	41.1435	43.9068	38.9392	42.465	34.2736	26.8794	18.8903	13.1631	34.4178	20.067	17.0771	24.45
1480	1181	502	ENSGALT00000039783	ENSGALG00000003438	NUF2	95.5511	71.8668	150.35	102.117	74.4173	90.961	46.6003	46.6667	106.378	95.2987	78.5219	107.846
5320	5021	502	ENSGALT00000000947	ENSGALG00000000671	NFAT5	23.8562	16.768	31.159	24.0192	15.01	17.9115	3.16508	0.574355	26.213	3.42414	2.22905	17.0917
1621	1322	502	ENSGALT00000039547	ENSGALG00000003887	EXOSC2	93.1291	78.66	157.485	91.2258	78.8112	92.9367	78.7421	61.8877	111.382	78.2707	82.2413	116.244
2306	2007	502	ENSGALT00000018952	ENSGALG00000011605	EPB41L5	29.8411	14.0587	44.4946	60.0899	28.7226	45.0923	6.69594	0.691836	40.8662	8.24904	5.04542	33.8732
7839	7540	501	ENSGALT00000023641	ENSGALG00000014670	TTC37	17.726	12.9164	0.757439	15.9629	12.5021	14.2379	10.2413	6.58702	19.4648	11.0842	7.56317	12.6397
4436	4137	501	ENSGALT00000024377	ENSGALG00000015109	TJP2	23.6338	17.6009	1.33866	29.0936	24.7277	26.8056	12.5554	9.24282	29.5284	20.3173	13.5268	28.3719
3546	3247	501	ENSGALT00000018070	ENSGALG00000011091	NUP133	35.5755	27.8213	69.769	37.0681	31.36	32.4083	20.0043	12.7302	36.8495	25.6411	23.4717	42.4979
3707	3408	501	ENSGALT00000014594	ENSGALG00000008972	MFN1	35.343	32.7832	2.08204	35.317	33.7606	40.5394	21.6881	19.1805	43.3196	27.1857	21.7374	46.7067
8264	7965	501	ENSGALT00000018998	ENSGALG00000011630	GLI2	15.9094	12.1701	20.446	15.1111	13.0511	12.0824	6.73552	5.36391	13.8469	5.29636	4.68386	12.2988
871	572	501	ENSGALT00000002351	ENSGALG00000001547	CAPZA1	245.554	165.09	350.06	210.42	208.169	211.204	101.809	87.9492	261.305	178.394	192.871	252.962
4310	4011	501	ENSGALT00000006958	ENSGALG00000004364	ABR	24.343	19.6288	34.5177	30.0075	27.8605	27.3299	15.1303	12.7553	26.5588	13.5338	8.23817	24.7381
2369	2070	500.113	ENSGALT00000041183	ENSGALG00000001093	TCF3	60.781	39.0747	82.9282	58.0421	36.5396	41.1658	8.56018	6.8488	60.2814	12.5187	9.48328	47.714
3025	2726	500	ENSGALT00000025629	ENSGALG00000015904	TMEM30A	46.2893	57.2621	94.7849	44.0646	38.4803	46.1616	25.7056	17.6317	45.3082	34.5711	26.3936	57.7423
773	474	500	ENSGALT00000015797	ENSGALG00000009703	NDUFS7	228.222	219.865	281.137	253.418	217.813	266.225	298.819	275.81	188.71	243.152	240.617	236.685
2044	1745	499	ENSGALT00000022417	ENSGALG00000013811	NCAPH2	68.7194	57.8971	85.7878	68.699	58.4883	64.6051	43.9463	42.1727	73.1572	46.7993	44.8966	65.8499
2953	2654	499	ENSGALT00000027426	ENSGALG00000016974	GTF2F2	48.0979	36.4382	79.4891	45.1695	47.7139	42.2376	44.0452	37.3066	51.9546	50.4444	55.8259	56.0443
1260	961	499	ENSGALT00000033524	ENSGALG00000007768	AURKA	132.277	95.6593	198.636	124.745	97.5996	104.121	79.4654	57.35	130.731	106.845	101.489	147.473
1317	1018	498	ENSGALT00000024692	ENSGALG00000015299	TFG	123.298	90.7502	165.583	117.524	107.684	111.508	75.4351	66.2047	127.298	94.2946	78.0064	114.181
1576	1277	498	ENSGALT00000001934	ENSGALG00000001267	MAP2K2	74.3711	68.0678	94.7308	93.688	81.9585	73.6976	67.4018	51.1043	71.3302	68.9369	61.3505	82.3068
1959	1660	498	ENSGALT00000006375	ENSGALG00000004002	LYPLA2	81.8003	57.709	122.083	72.072	70.0226	66.2922	47.9313	28.7612	82.4834	34.4274	26.6478	80.3078
1942	1643	498	ENSGALT00000000550	ENSGALG00000000404	COPS2	96.6106	68.2777	205.085	72.8177	76.6427	87.2784	72.6409	50.3815	114.933	126.636	114.83	116.666
2328	2029	497	ENSGALT00000005643	ENSGALG00000003563	YARS	52.4609	44.298	76.3389	58.8464	49.1373	60.1343	49.202	36.4276	65.1525	41.5041	30.995	58.2224
7677	7378	497	ENSGALT00000027676	ENSGALG00000017132	XPO4	17.8621	11.3804	26.2246	16.1832	12.2322	13.9747	7.2714	3.86527	17.3812	10.594	6.93464	14.7001
4161	3862	497	ENSGALT00000016022	ENSGALG00000009855	TBC1D9	30.2557	20.9163	42.8849	30.9164	24.3474	22.4984	9.44501	4.50798	24.9101	11.2118	9.522	21.6642
1670	1371	497	ENSGALT00000007186	ENSGALG00000006284	SH3GLB1	75.7906	74.023	160.819	87.0892	80.3026	119.315	79.5842	66.0641	117.958	128.885	127.505	132.708
2134	1835	497	ENSGALT00000010862	ENSGALG00000006715	OAF	57.0622	61.6296	91.9546	65.0677	68.7521	53.6026	63.006	49.5337	70.463	48.6681	43.2755	71.9598
624	325	497	ENSGALT00000046236	ENSGALG00000026530		370.612	417.284	205.013	367.382	325.668	274.758	615	510.382	242.27	331.116	277.137	312.116
1666	1367	496.928	ENSGALT00000018675	ENSGALG00000011452		103.641	95.2591	155.097	87.3314	104.527	85.4043	81.9832	75.9071	89.4729	135.299	93.1178	113.096
2464	2165	496	ENSGALT00000043506	ENSGALG00000025930	PHC2	53.2934	46.0347	58.194	55.0388	54.235	45.1705	46.4068	40.7995	44.3463	28.2352	28.8018	45.0424
1225	926	496	ENSGALT00000027078	ENSGALG00000016772	PDCL3	122.584	106.155	237.355	128.682	128.843	204.183	104.814	124.456	192.88	191.166	178.419	222.025
11595	11296	496	ENSGALT00000040276	ENSGALG00000003999	NAV2	10.8047	7.57413	23.3795	10.5488	9.3908	13.472	3.92787	2.76099	14.3081	5.01698	4.15192	13.4644
2457	2158	496	ENSGALT00000044786	ENSGALG00000027046	INTS3	47.2234	40.3847	77.8705	55.2174	53.754	89.0262	24.1189	12.9675	109.504	33.4905	17.7817	69.0429
4217	3918	495	ENSGALT00000025327	ENSGALG00000015705	WHSC1	25.3974	14.0547	36.4414	30.3519	19.3563	23.0805	6.50612	1.9628	26.5982	13.2862	8.70577	22.1778
4582	4283	495	ENSGALT00000005696	ENSGALG00000003601	ATP2B4	28.9011	24.8638	42.387	27.7653	20.9612	19.0469	9.03956	3.8903	29.9863	8.95749	4.72854	20.4206
1498	1199	494.853	ENSGALT00000009999	ENSGALG00000006197	CSNK2A1	110.19	87.8093	146.763	99.1522	93.4382	114.089	39.8966	21.268	104.08	27.698	7.47942	117.244
7069	6770	494.522	ENSGALT00000020527	ENSGALG00000012570	TANC1	17.4228	12.1702	27.4537	17.5486	13.7989	14.4849	5.828	4.31303	17.9401	8.7257	5.28771	15.1413
2494	2195	494	ENSGALT00000000748	ENSGALG00000000541	ZC3H11A	48.1289	35.5573	82.55	54.0677	47.5739	60.5871	19.0962	11.1432	53.5873	25.456	17.9675	56.6716
8351	8052	494	ENSGALT00000026815	ENSGALG00000016614	SHROOM2	13.9152	12.0103	28.7794	14.739	11.0616	13.3502	6.4508	3.93967	18.5866	7.9279	6.22179	15.763
2377	2078	494	ENSGALT00000005757	ENSGALG00000003634	PTEN	64.3187	45.2245	94.277	57.1119	49.0019	43.0746	21.9165	11.308	59.2048	45.2751	38.9843	54.2322
1263	964	494	ENSGALT00000008126	ENSGALG00000005070	AP3M1	143.765	118.494	237.693	123.111	117.637	131.491	76.3415	56.7283	143.537	107.173	92.8803	165.974
1275	976	493	ENSGALT00000004660	ENSGALG00000002948	TXNL1	120.131	102.582	4.43297	121.351	104.814	70.3787	107.75	102.65	70.3919	157.56	191.668	90.4547
1308	1009	493	ENSGALT00000001980	ENSGALG00000001298	RFC2	127.157	110.7	128.715	117.382	131.357	122.258	118.919	122.068	128.433	178.731	167.968	134.578
2687	2388	493	ENSGALT00000011121	ENSGALG00000006867	QRICH1	48.7635	30.0155	73.7041	49.5973	31.2632	48.3066	17.2402	8.99019	61.2168	23.8653	23.2108	50.264
1119	820	492.538	ENSGALT00000007496	ENSGALG00000004706	C15ORF23	141.89	111.748	173.974	144.302	114.557	188.221	129.905	127.474	161.534	196.262	163.066	161.078
2192	1893	492.239	ENSGALT00000007541	ENSGALG00000004736	STAU1	60.8262	36.2576	98.5997	62.4699	69.9927	85.3537	29.4563	20.2818	119.597	55.3956	32.7538	62.6263
3004	2705	492	ENSGALT00000016711	ENSGALG00000010276	GPBP1L1	41.4709	38.6955	78.4383	43.6962	43.146	49.1379	27.9555	21.1643	54.7919	36.3108	26.0075	48.2779
1146	847	492	ENSGALT00000000935	ENSGALG00000000660	CYB5B	158.112	109.609	302.605	139.549	154.528	202.493	137.004	116.14	208.25	160.694	166.745	245.869
2203	1904	492	ENSGALT00000001580	ENSGALG00000001054	C20H20ORF24	76.9921	68.957	127.616	62.0788	71.5962	65.6443	70.8058	57.9483	72.4199	64.4622	75.0169	96.2558
1122	823	492	ENSGALT00000044307	ENSGALG00000027182		113.128	87.9218	124.488	143.619	136.069	150.835	71.4069	39.9722	158.28	86.2685	87.4229	156.757
7391	7092	491	ENSGALT00000003495	ENSGALG00000002232	RERE	15.9117	12.5452	25.9888	16.6325	15.5904	13.9691	7.50448	5.58743	16.3133	6.95842	6.46281	14.4904
2843	2544	491	ENSGALT00000041182	ENSGALG00000006543	PFKL	32.4031	25.7599	1.15648	46.3671	41.6046	46.9032	40.5833	28.4236	53.7838	27.2827	29.7483	41.4643
3594	3295	491	ENSGALT00000003413	ENSGALG00000002179	FBF1	24.5724	24.4465	32.9844	35.7991	29.6842	25.3383	16.7349	13.6469	28.4059	14.1073	11.1605	22.7819
3124	2825	491	ENSGALT00000008510	ENSGALG00000005308	CHTF18	34.1378	24.3253	55.5028	41.755	33.7865	44.7194	26.8813	19.1689	39.7924	21.8641	18.4884	35.7505
6692	6393	491	ENSGALT00000024299	ENSGALG00000015061	CDC40	17.7767	12.5287	28.5867	18.4511	17.4059	19.9826	10.3103	7.63517	19.0479	15.3887	13.5886	19.3293
3545	3246	491	ENSGALT00000002223	ENSGALG00000001467	ANKFY1	31.2717	18.5766	42.1195	36.3395	21.3255	24.3028	7.68875	1.21748	30.6778	12.5057	7.55268	25.4248
2553	2254	491	ENSGALT00000043085	ENSGALG00000028484		55.2724	63.196	3.148	52.3327	54.6091	59.661	29.6216	16.4431	68.5806	44.2824	52.0188	67.3088
448	149	490.646	ENSGALT00000042817	ENSGALG00000026798	KIFC1	859.121	488.977	739.046	791.093	586.932	1106.04	763.807	620.121	597.893	276.779	181.64	649.103
5114	4815	490	ENSGALT00000010889	ENSGALG00000006731	TAF3	22.4113	18.0997	39.8603	24.4481	22.129	21.9134	15.9265	9.64939	28.0158	19.5723	37.4121	23.904
6784	6485	490	ENSGALT00000015976	ENSGALG00000009825	SRGAP1	22.8723	18.5265	46.8885	18.1523	18.0698	19.1422	12.5324	8.26801	26.0388	11.4146	9.69758	23.8237
1242	943	490	ENSGALT00000011836	ENSGALG00000007315	PSMD6	125.466	107.62	289.968	124.833	133.034	158.674	115.479	76.0008	174.361	172.358	127.729	206.823
3490	3191	490	ENSGALT00000023302	ENSGALG00000014425	NCAPG	36.367	30.3062	53.2044	36.8905	30.2075	28.2945	21.7592	14.2925	32.8697	30.1819	27.7251	33.5922
2123	1824	490	ENSGALT00000018720	ENSGALG00000011483	MPC1	67.0594	57.5103	147.066	64.5382	67.742	73.4929	65.5495	50.945	85.4887	106.476	106.942	110.359
1338	1039	490	ENSGALT00000025976	ENSGALG00000016124	HADH	129.536	122.862	195.05	113.299	114.148	103.12	97.418	79.8753	125.654	154.288	127.212	158.375
3188	2889	490	ENSGALT00000039051	ENSGALG00000006856	CD151	38.6911	42.7683	65.8347	40.7468	36.2274	50.7635	26.4335	17.9309	43.9542	25.2369	19.0012	53.2367
2833	2534	489	ENSGALT00000005191	ENSGALG00000003282	Stat5	49.6913	41.8455	66.7257	46.3605	36.7342	42.3934	26.559	20.9487	45.9614	23.3069	19.3496	44.7974
3042	2743	489	ENSGALT00000043545	ENSGALG00000025796	Fe	50.5735	43.8003	79.4968	42.8281	43.8402	42.0289	44.4825	39.7564	48.4044	40.7407	35.9449	51.1826
1978	1679	489	ENSGALT00000013704	ENSGALG00000008414	DVL3	64.1118	48.5179	1.33998	69.9687	67.5416	85.0696	36.971	26.4	95.113	33.6585	30.1554	100.567
2076	1777	488	ENSGALT00000040237	ENSGALG00000008444	TUBAL3	68.0855	76.4748	125.158	65.9748	91.477	74.2042	90.7025	68.9445	110.07	68.4465	69.5812	87.3694
3077	2778	488	ENSGALT00000025234	ENSGALG00000015649	NOP14	38.9887	26.375	74.3213	42.202	34.103	43.4367	28.6031	20.8389	53.0395	40.514	52.9503	48.1702
5275	4976	487.169	ENSGALT00000014170	ENSGALG00000008708	ESF1	21.5619	17.2311	28.468	23.5204	16.9449	21.924	10.9159	8.79644	22.737	17.1881	19.4253	19.7702
1618	1319	487.016	ENSGALT00000042675	ENSGALG00000028938		74.4122	102.122	138.039	88.7041	94.1311	92.1316	99.4651	90.0308	74.0195	126.298	139.336	111.967
1127	828	487	ENSGALT00000001207	ENSGALG00000021679	SF3A2	125.333	97.8338	244.546	141.301	120.125	157.878	156.507	114.42	147.768	137.465	151.905	175.592
2580	2281	487	ENSGALT00000040550	ENSGALG00000024034	PI4KB	43.3319	38.0075	79.4377	51.2919	49.9232	42.9665	21.2753	16.4826	52.836	17.7266	14.72	50.3484
15018	14719	487	ENSGALT00000019298	ENSGALG00000011823	FAT4	9.3432	9.18285	19.4239	7.9487	7.03035	6.35541	1.47098	0.943348	10.4234	2.09817	0.760383	8.55867
2458	2159	487	ENSGALT00000044790	ENSGALG00000026437	CHST2	51.2791	55.5427	1.3627	54.1903	48.2577	40.3105	59.2812	39.874	62.0339	44.1664	38.756	58.9346
1900	1601	486	ENSGALT00000008119	ENSGALG00000005064	PRPSAP2	82.9819	63.9574	170.685	72.9273	75.8495	102.262	74.8796	50.3022	126.266	88.1962	67.5766	123.005
4548	4249	486	ENSGALT00000003942	ENSGALG00000002499		26.3699	17.4047	44.5183	27.4786	18.5156	30.1989	6.2252	1.63393	35.2904	11.4644	6.8987	29.3654
3710	3411	485	ENSGALT00000020339	ENSGALG00000012440	ZEB2	29.407	17.8781	54.2377	34.159	28.0514	40.8982	8.97406	4.60302	41.9802	23.1015	14.3747	31.5183
3197	2898	485	ENSGALT00000040356	ENSGALG00000023958	YOD1	32.5414	29.3658	67.4218	40.2058	36.5225	34.2585	17.2609	11.3517	41.5203	23.5106	16.1836	47.114
1021	722	485	ENSGALT00000017523	ENSGALG00000010774	SSBP3	146.874	122.913	11.0262	161.38	145.614	119.854	118.475	87.5773	130.305	80.0363	76.7693	119.386
5184	4885	485	ENSGALT00000038693	ENSGALG00000009683	NEK1	21.4895	18.213	42.5484	23.8519	19.3937	23.2954	12.4669	7.52144	26.4885	17.6625	18.7653	25.0891
6630	6331	485	ENSGALT00000005665	ENSGALG00000003579	CTK-1	11.7143	11.5013	15.8001	18.4041	10.9712	14.2389	4.4307	2.66558	13.6104	5.43124	3.61983	11.6072
518	219	485	ENSGALT00000030826	ENSGALG00000019445	COX6C	639.529	844.726	588.731	532.038	535.08	402.25	726.143	719.862	390.375	1014.02	1253.3	458.855
2379	2080	485	ENSGALT00000041266	ENSGALG00000024391	CACTIN	55.1506	44.8528	90.5254	56.0175	58.3822	71.3588	41.9448	39.2831	88.6986	46.15	43.3027	68.5916
2316	2017	485	ENSGALT00000012247	ENSGALG00000007574		55.1538	43.9975	83.5715	57.7672	53.9978	65.8988	45.846	30.2369	67.4537	46.4076	40.1633	63.1778
2194	1895	484	ENSGALT00000007756	ENSGALG00000004856	NUP62CL	54.6924	48.7513	98.2671	61.3595	60.7157	60.8739	53.1877	45.5417	64.0057	48.5552	46.6864	68.6802
4031	3732	484	ENSGALT00000009407	ENSGALG00000005854	CLUH	28.8077	18.7183	38.2576	31.1565	22.2201	25.0468	10.3742	5.8098	28.4409	13.7778	10.9961	23.1814
2960	2661	484	ENSGALT00000001695	ENSGALG00000001126	CHAF1A	42.2569	31.3827	59.834	43.6964	36.3128	37.0969	23.2072	18.0624	43.659	33.8003	35.8509	43.6338
6335	6036	484	ENSGALT00000004555	ENSGALG00000002889	ASPSCR1	15.9773	13.6467	26.3781	19.2638	15.6173	16.4247	16.875	12.9883	17.7286	12.9494	14.1274	17.9265
2195	1896	483.005	ENSGALT00000043151	ENSGALG00000028009		66.195	64.7401	107.75	61.201	71.6821	77.5976	56.8647	50.8908	76.6803	48.3542	36.7257	83.8648
16596	16297	483	ENSGALT00000027658	ENSGALG00000017120	SACS	6.62149	5.62687	10.3857	7.12008	6.20465	4.54075	2.28405	1.63192	6.17546	3.10625	2.58351	5.07569
3078	2779	483	ENSGALT00000000633	ENSGALG00000000464	RHOBTB2	31.3909	27.2662	48.6994	41.7546	33.6657	40.8474	28.6312	18.6885	42.5344	21.6531	17.6437	38.3903
4361	4062	483	ENSGALT00000020241	ENSGALG00000012394	NID2	30.5064	38.2044	39.9639	28.5662	33.4433	29.4971	23.0013	15.5401	31.7365	11.6395	9.8404	29.4406
2717	2418	483	ENSGALT00000012929	ENSGALG00000007960	AHCYL2	56.3228	33.8778	64.9166	47.9884	34.8813	48.6737	33.2145	20.0101	68.5582	35.5513	22.0412	48.4896
1667	1368	482	ENSGALT00000009310	ENSGALG00000005796	XBP1	109.206	127.412	103.357	84.646	92.9131	89.2422	94.962	66.6774	82.9495	71.1005	72.8529	82.6565
6071	5772	482	ENSGALT00000025610	ENSGALG00000015889	PHIP	18.6955	10.2104	30.1332	20.0616	11.2561	14.5137	2.71631	0.740186	20.9468	6.56399	4.98608	16.5113
5058	4759	482	ENSGALT00000001297	ENSGALG00000000883	MAPKAPK2	25.2256	23.4766	34.0381	24.3319	22.3894	20.4154	17.369	12.2766	23.8848	15.0861	15.7905	22.378
3384	3085	482	ENSGALT00000038351	ENSGALG00000015053	GLDC	26.764	21.1688	0.841475	37.5351	31.6283	33.0083	14.9008	11.2521	37.4083	19.6086	14.8571	33.8444
3230	2931	482	ENSGALT00000022856	ENSGALG00000014122	CYB5R3	45.2362	42.1554	91.6391	39.5072	37.401	46.3396	32.2772	21.9011	53.6617	35.4119	28.1843	58.7095
1593	1294	481	ENSGALT00000004260	ENSGALG00000002703	TFAM	93.7011	79.1312	166.376	89.301	84.7158	108.027	70.3902	65.6206	119.981	117.978	102.555	117.098
3390	3091	481	ENSGALT00000004118	ENSGALG00000002616	LZIC	35.7743	23.4834	76.7055	37.3845	32.1019	42.3601	20.3583	15.9989	56.9401	40.7376	27.0702	55.4863
3458	3159	481	ENSGALT00000015752	ENSGALG00000009678	KCTD3	35.7642	27.4438	50.4015	36.5798	37.6183	37.4357	19.3123	13.423	46.3065	22.2736	20.0765	41.3396
2765	2466	481	ENSGALT00000011691	ENSGALG00000007224	HGS	41.8121	31.9266	60.4248	46.8595	35.2562	42.6722	30.3622	20.8334	45.9375	21.8839	21.6122	42.6732
2652	2353	481	ENSGALT00000000973	ENSGALG00000000690	GDPD4	43.65	54.1546	73.3294	49.1098	36.5477	42.2838	30.3698	22.1062	37.5635	19.2815	15.402	40.1536
2509	2210	481	ENSGALT00000045313	ENSGALG00000026531	CHST14	60.4167	68.4697	86.1894	52.2875	66.3866	57.8125	46.7003	31.6077	63.2221	56.257	43.6494	71.5963
3975	3676	480	ENSGALT00000040268	ENSGALG00000008736	PNPLA7	31.206	29.5265	45.5256	31.3698	22.9442	29.0692	15.9869	7.32204	37.6414	17.019	11.1637	30.9493
720	421	480	ENSGALT00000010814	ENSGALG00000006691	ARPC4	298.775	265.921	291.042	273.908	286.761	242.214	291.85	278.058	222.093	289.644	301.291	250.108
6712	6413	479.576	ENSGALT00000012496	ENSGALG00000007712	MYO1B	18.3442	14.9591	34.1668	17.9656	16.014	15.7931	9.27124	6.2623	25.2478	10.2271	9.72335	20.9309
2123	1824	479.046	ENSGALT00000007248	ENSGALG00000004554	CACYBP	50.5472	36.5859	91.686	63.0954	44.9661	69.4886	39.489	29.0914	72.6994	54.9271	53.3707	73.6907
1588	1289	479	ENSGALT00000003977	ENSGALG00000002524	UCHL5	92.4089	68.6698	193.337	89.2746	89.8099	90.042	74.8832	53.6116	117.078	119.424	124.866	141.641
3034	2735	479	ENSGALT00000025589	ENSGALG00000015874	TTK	43.4058	30.6168	93.9035	42.075	32.3069	44.2232	15.3648	8.47441	56.0255	34.1663	32.1527	52.6041
3032	2733	479	ENSGALT00000026589	ENSGALG00000016480	SDC1	51.3442	58.7807	82.9539	42.1057	37.863	43.6078	28.0594	18.9934	55.8546	23.2408	23.4009	53.9847
1724	1425	479	ENSGALT00000042898	ENSGALG00000026234	POLD2	82.5598	70.1002	61.6956	80.7544	81.5701	87.8591	89.5169	86.7213	99.6748	57.1969	49.7426	87.871
3617	3318	479	ENSGALT00000002857	ENSGALG00000001845	PHTF1	34.5328	37.0328	53.7759	34.682	31.401	33.2301	19.2548	13.2948	37.835	18.7594	16.5444	40.445
2286	1987	479	ENSGALT00000012758	ENSGALG00000007860	KLHDC4	50.4818	45.2344	91.4527	57.9139	58.7368	68.2124	41.5462	34.7787	72.0657	44.2241	35.9417	65.4684
6469	6170	479	ENSGALT00000011895	ENSGALG00000007354	CIT	15.0682	8.51915	25.8052	18.6507	8.88349	13.5775	3.30169	1.1079	18.3445	5.00535	4.31893	13.0171
4452	4153	478.287	ENSGALT00000045085	ENSGALG00000028700	IDH3B	25.5192	25.4041	17.0207	27.6676	25.7822	31.2316	20.1711	18.257	30.2667	22.2791	17.4732	29.2276
10834	10535	478	ENSGALT00000025275	ENSGALG00000015673	ZFHX4	12.9652	8.87721	16.2303	10.9003	8.25266	5.0279	1.87295	0.486647	10.7712	1.88883	0.910604	6.35106
10704	10405	478	ENSGALT00000008368	ENSGALG00000005210	WNK2	7.10204	3.9364	11.3269	11.0365	9.19589	9.18098	3.71069	2.6792	8.60594	4.77342	5.327	7.90126
318	19	478	ENSGALT00000017955	ENSGALG00000011020	Protein	6528.97	5532.96	7232.22	6043.93	5744.73	3894.77	4647.99	5317.95	4453.88	8688.46	8134.59	6527.09
7429	7130	478	ENSGALT00000012438	ENSGALG00000007672	PPFIA1	15.3031	10.021	24.2726	16.1059	11.6968	12.0374	6.25281	3.08592	15.2655	9.24333	7.17585	14.7502
3189	2890	478	ENSGALT00000045239	ENSGALG00000027076	MTURN	40.3855	29.6046	77.609	39.7352	34.6616	32.2461	25.8707	17.5181	41.9691	27.762	22.6829	46.0846
3005	2706	478	ENSGALT00000026992	ENSGALG00000016727	JADE3	35.5404	26.9927	65.6822	42.4371	34.9231	38.3118	9.06544	3.59187	47.1407	18.4722	9.05986	42.137
2281	1982	478	ENSGALT00000010517	ENSGALG00000006506	C13H5ORF15	62.8577	76.2314	140.145	57.9388	65.9178	67.4198	48.7543	37.2376	80.7185	72.3667	62.1155	100.668
2224	1925	477.48	ENSGALT00000006698	ENSGALG00000004212	ADAM10	56.7447	54.7521	77.9025	59.5895	37.4155	46.3223	10.0176	4.67903	58.7487	19.5677	11.0744	47.9363
4689	4390	477.153	ENSGALT00000046188	ENSGALG00000027204		23.4319	21.4498	27.6547	26.1119	25.9337	26.2862	16.7106	15.2293	22.2031	11.6752	7.98792	24.9622
7609	7310	477	ENSGALT00000005284	ENSGALG00000003339	MTOR	17.7181	11.0505	22.4675	15.6764	12.443	13.9981	6.23016	4.10578	17.7408	7.33888	5.10355	13.4873
1337	1038	477	ENSGALT00000027170	ENSGALG00000016829	LAMP1	92.6516	114.431	157.891	110.399	90.5872	84.7995	50.9651	33.2363	113.783	73.9209	51.858	101.745
1956	1657	477	ENSGALT00000018280	ENSGALG00000011209	EVL	67.9415	50.398	87.8372	69.1578	54.0378	47.2663	46.6664	31.9717	61.1448	50.4376	46.6377	57.0195
3908	3609	476.714	ENSGALT00000015838	ENSGALG00000009731	ARHGAP11A	29.5677	25.5112	56.6734	31.7334	22.0367	24.7479	14.5228	10.2695	28.2338	24.0659	19.24	31.8567
649	350	476	ENSGALT00000042637	ENSGALG00000028943	ZFR2	296.882	232.747	114.716	326.726	304.431	319.675	245.311	207.819	318.424	233.328	194.91	380.346
2737	2438	476	ENSGALT00000016606	ENSGALG00000010213	VSX2	55.4778	39.5732	114.5	46.905	39.8281	67.1252	54.6288	44.73	75.27	51.5182	44.3766	59.9721
2849	2550	476	ENSGALT00000002464	ENSGALG00000001616	CDC45	49.2226	41.8506	78.1839	44.8448	40.395	50.9306	29.5711	20.524	44.727	38.2057	32.1864	56.098
2190	1891	476	ENSGALT00000006965	ENSGALG00000004366	BAP1	49.4472	40.4312	84.747	60.4729	47.1011	57.4451	18.7256	12.7651	62.8654	19.4463	11.8372	56.8529
2013	1714	475	ENSGALT00000024055	ENSGALG00000014915	THOC1	69.8845	53.3684	124.194	66.5776	60.2354	63.6665	48.5369	39.1342	80.3351	79.038	74.9372	75.0843
3241	2942	474.804	ENSGALT00000038610	ENSGALG00000009913	SMARCA5	32.2684	39.1051	55.2632	38.7719	43.7551	15.9114	55.414	47.7172	19.6166	59.2281	82.2584	34.6592
4470	4171	474	ENSGALT00000002261	ENSGALG00000001491	NCAPD3	27.6945	17.8938	46.8445	27.3013	20.5611	23.4802	10.2028	7.32374	30.7221	13.8161	10.3499	29.5355
2752	2453	474	ENSGALT00000020309	ENSGALG00000012425	FERMT2	50.734	41.372	59.334	46.4223	47.3858	40.1847	22.5662	14.0641	46.417	23.6223	14.9914	38.3104
3946	3647	474	ENSGALT00000022900	ENSGALG00000005914	FAM21A	27.0652	21.0263	42.0914	31.224	23.0619	29.1256	12.6046	8.52245	33.0989	19.4241	11.6908	28.7157
3724	3425	473	ENSGALT00000023502	ENSGALG00000014575	SEPHS1	36.4528	28.9	58.7657	33.1777	32.9722	33.6186	19.6809	13.1289	42.9355	32.3494	24.586	37.9997
3237	2938	473	ENSGALT00000007292	ENSGALG00000004583	NPLOC4	34.5954	31.1346	52.0721	38.6772	32.5675	36.2265	26.1741	16.9047	45.5202	19.3976	17.7773	39.2186
4533	4234	473	ENSGALT00000035021	ENSGALG00000014426	KPNA1	28.1645	22.2494	51.5838	26.8383	24.775	30.4229	13.4014	9.20766	34.8685	15.3776	11.3288	33.3379
2979	2680	473	ENSGALT00000024042	ENSGALG00000014907	DCBLD1	31.5053	27.1697	46.5592	42.4006	26.2701	37.6794	10.7055	4.66292	43.8536	14.7311	10.1421	31.2191
941	642	473	ENSGALT00000007493	ENSGALG00000004705	BUD31	166.423	144.609	209.186	176.999	163.023	146.15	164.305	175.686	116.632	265.566	255.686	208.536
4185	3886	473	ENSGALT00000033235	ENSGALG00000007609	ARHGAP19	28.1466	24.5932	43.6889	29.2418	23.4674	24.2728	18.9929	12.8357	33.3477	13.8462	11.7947	28.5445
839	540	472.731	ENSGALT00000039119	ENSGALG00000008713	BIRC5	170.979	118.942	271.908	210.313	126.719	141.337	206.611	170.894	115.791	154.849	193.802	168.959
2557	2258	472.655	ENSGALT00000007650	ENSGALG00000004793	NXN	40.314	37.4045	41.9481	50.2882	43.2053	34.7672	35.1666	28.2733	36.2522	25.999	48.1547	33.295
4023	3724	472.578	ENSGALT00000045404	ENSGALG00000027143		25.0133	19.4109	38.6953	30.4866	26.2425	28.2572	10.8906	5.93701	34.4439	12.4822	8.72995	27.7751
3799	3500	472	ENSGALT00000002094	ENSGALG00000001374	SLC35E2B	37.0055	39.723	72.5877	32.3981	34.3582	37.1268	26.6947	15.5941	41.9052	31.0194	29.3887	48.6048
2642	2343	472	ENSGALT00000043998	ENSGALG00000028567	MYL9	50.3263	49.2385	71.2787	48.3966	52.7364	53.3448	48.5714	42.3041	53.044	60.1296	55.2746	49.7449
2704	2405	472	ENSGALT00000007812	ENSGALG00000000304	MTFR1	45.6457	39.2647	66.3469	47.149	41.4551	42.0762	33.5714	22.4276	54.4449	35.611	36.5646	47.9629
3651	3352	472	ENSGALT00000000128	ENSGALG00000000091	INTS4	30.8399	22.3337	43.5756	33.8286	27.065	32.893	19.0595	14.0203	31.5788	20.1838	18.2846	28.0168
3921	3622	472	ENSGALT00000025829	ENSGALG00000016034	ATRN	25.6684	18.847	37.556	31.3068	16.9592	24.2824	3.29806	1.29751	28.8784	4.79066	2.64859	23.3791
1339	1040	471	ENSGALT00000019039	ENSGALG00000011650	NIFK	115.816	95.1755	192.034	108.801	107.905	119.226	112.605	102.393	126.832	157.201	135.801	145.332
1303	1004	471	ENSGALT00000000556	ENSGALG00000000408	LSM7	134.716	121.705	248.735	112.702	135.776	148.822	137.358	101.064	154.157	167.436	165.089	191.926
8373	8074	471	ENSGALT00000003364	ENSGALG00000002145	CAMSAP2	11.8122	8.84933	25.6358	14.0145	11.3826	12.0596	4.17433	2.56637	16.9823	7.88658	6.60089	15.7435
2662	2363	471	ENSGALT00000002009	ENSGALG00000001317		43.5781	43.5255	71.6276	47.8853	41.5921	50.6157	30.2864	20.9278	54.3509	30.383	24.133	52.2678
5522	5223	470	ENSGALT00000041261	ENSGALG00000002141	UGGT1	22.8825	23.7871	1.25912	21.6184	15.0628	18.8865	10.1082	5.25557	24.1646	13.2583	11.4285	19.8573
2979	2680	470	ENSGALT00000026488	ENSGALG00000016420	SH3KBP1	44.6948	33.2829	72.3895	42.1317	40.8157	49.3584	22.6845	15.025	61.1718	29.3433	23.466	49.8845
3381	3082	470	ENSGALT00000024114	ENSGALG00000014948	HMGCR	43.2362	52.6413	2.91995	36.6362	35.1086	31.7767	18.8951	11.1938	41.7027	28.0469	28.0139	39.6228
2468	2169	470	ENSGALT00000019843	ENSGALG00000012149	HERPUD2	50.7352	48.5725	108.035	52.0576	60.2347	72.2832	34.913	26.0497	78.9644	49.1737	46.1944	83.5334
1713	1414	470	ENSGALT00000021930	ENSGALG00000013452	ERP44	83.5794	90.1173	130.103	79.8535	71.0102	81.5313	64.0394	46.2284	85.7102	74.6417	92.7208	92.1773
5590	5291	470	ENSGALT00000001236	ENSGALG00000000843	DOT1L	15.2018	11.1816	20.345	21.3405	12.2794	14.2404	3.66879	1.9985	15.4468	3.30958	3.72697	11.7254
2777	2478	470	ENSGALT00000004032	ENSGALG00000002552	COL3A1	25.5686	33.1494	35.339	45.5661	30.5091	39.865	6.19798	1.5517	31.6968	4.1757	1.7206	35.7546
2958	2659	470	ENSGALT00000004100	ENSGALG00000002603	COG4	38.727	33.2034	53.826	42.4644	32.0752	39.4417	28.6397	19.4819	36.9784	24.6659	21.647	37.2689
6671	6372	470	ENSGALT00000002593	ENSGALG00000001692	CAMSAP1	14.6743	10.606	25.5847	17.7202	13.5702	13.7361	7.86703	4.47551	18.0507	10.3429	6.77487	16.088
2538	2239	470	ENSGALT00000008433	ENSGALG00000005249	BICD2	40.1533	21.9517	63.3045	50.43	29.2285	43.2981	5.47813	2.33749	56.025	16.4239	9.04526	41.0117
2712	2413	470	ENSGALT00000014053	ENSGALG00000008625	ANAPC2	42.5646	32.6278	60.0307	46.7935	46.3111	45.7811	36.952	28.5502	43.3875	32.986	36.4433	45.8382
3088	2789	469	ENSGALT00000039413	ENSGALG00000028773	Gga.52643	40.8436	58.9058	51.255	40.3989	52.0964	21.5819	44.3224	29.2202	33.1097	19.9202	18.5359	21.836
6147	5848	469	ENSGALT00000026021	ENSGALG00000016148	C2CD2	15.7839	18.9103	26.575	19.2669	16.6445	17.3766	7.76946	5.82627	18.315	9.4186	6.83511	19.6383
1658	1359	468	ENSGALT00000015309	ENSGALG00000009398	TES	61.9334	55.7563	68.0028	82.7317	87.4439	56.3282	21.0331	14.7756	48.1396	35.9614	21.5692	57.796
3006	2707	468	ENSGALT00000013703	ENSGALG00000008413	PPP4R1	46.6635	32.8668	98.0074	41.5339	31.8556	44.4713	16.4694	9.46957	60.2052	26.0515	18.9006	63.6143
2903	2604	468	ENSGALT00000012260	ENSGALG00000007582	DPYSL3	29.3002	27.7005	45.1932	43.1768	41.1904	36.1685	25.6402	18.95	35.7585	25.1868	23.5369	40.3632
2216	1917	468	ENSGALT00000014723	ENSGALG00000009044		68.7464	73.4747	117.091	58.6502	63.3464	67.748	62.3695	41.4532	78.0193	64.3572	63.6656	78.3826
2247	1948	468	ENSGALT00000037124	ENSGALG00000022935		42.8885	26.1655	37.2246	57.7168	43.176	44.8949	27.0475	19.7388	21.8445	35.3721	27.6327	30.7113
2854	2555	467	ENSGALT00000020617	ENSGALG00000012631	PWP1	47.4035	39.4532	93.4068	43.9108	49.6552	54.8774	41.0764	33.9029	62.5406	34.9534	29.4117	68.9581
3381	3082	467	ENSGALT00000027586	ENSGALG00000017077	HSPH1	42.3274	25.6931	48.853	36.4024	32.4256	30.49	16.5072	10.7086	38.8223	24.1214	17.6384	32.954
1513	1214	467	ENSGALT00000015508	ENSGALG00000009525	HAT1	94.2722	88.8442	182.757	92.4152	91.8553	79.797	72.2174	71.7044	102.056	131.129	133.02	135.806
3745	3446	467	ENSGALT00000040721	ENSGALG00000021475	ADAR	29.9599	22.4509	43.8936	32.5572	30.646	31.0299	15.8778	10.7243	33.8255	14.3669	12.9914	29.8218
9321	9022	466.976	ENSGALT00000037435	ENSGALG00000012329	GLI3	10.9701	8.22514	15.0081	12.4347	11.4173	7.38674	7.02422	3.8691	7.28324	6.36932	5.9073	6.15442
4693	4394	466	ENSGALT00000000559	ENSGALG00000000410	TLK2	25.9247	19.8339	43.6006	25.4784	22.3673	22.208	13.4717	9.45576	29.2507	12.97	11.2801	29.9507
15257	14958	466	ENSGALT00000019352	ENSGALG00000011869	KIAA1109	6.88429	5.32432	8.48077	7.48441	4.83313	5.17447	2.02504	0.999681	5.92191	2.30942	1.1758	4.73522
1421	1122	466	ENSGALT00000019060	ENSGALG00000011659	ACAT2	104.261	94.7095	183.089	99.7789	93.7018	103.507	92.2078	82.5341	125.56	128.544	102.601	147.336
1357	1058	465	ENSGALT00000020821	ENSGALG00000012759	NUP37	111.577	96.3522	225.408	105.588	112.322	127.104	99.1969	104.891	157.416	175.29	153.64	170.235
3328	3029	465	ENSGALT00000038234	ENSGALG00000007512	MORC2	31.2221	26.1426	57.7068	36.8807	34.007	36.7513	19.4722	16.6437	48.3576	24.4383	21.1141	41.9028
1120	821	465	ENSGALT00000040496	ENSGALG00000000529	LIMD2	129.488	155.485	131.537	136.068	123.163	89.3585	118.479	119.298	105.425	104.899	116.199	105.529
1272	973	465	ENSGALT00000044140	ENSGALG00000028122	DDX23	81.5679	71.5613	50.1581	114.812	80.3704	91.8472	59.1929	35.5663	112.26	56.772	49.8448	88.7837
8478	8179	465	ENSGALT00000021853	ENSGALG00000013399	CELSR1	15.1669	15.4405	29.8349	13.6583	9.56112	13.8355	4.29027	1.82825	16.1509	7.64909	3.90969	13.9177
3380	3081	465	ENSGALT00000016557	ENSGALG00000010186	CAPN1	34.4184	30.7974	40.5556	36.2582	32.5895	35.9242	26.0671	17.4375	35.4838	17.1539	16.7792	32
4269	3970	465	ENSGALT00000009286	ENSGALG00000005781	ARFGAP1	26.0727	18.5132	38.8412	28.1389	18.6862	24.0982	12.412	6.18792	31.8643	17.9641	13.5588	26.0927
4085	3786	464.745	ENSGALT00000013813	ENSGALG00000008477	EXOC4	30.5081	19.7735	40.7746	29.4903	20.4679	24.2104	17.2239	11.1153	34.0183	16.6927	17.174	25.6339
5994	5695	464	ENSGALT00000015678	ENSGALG00000009626	THBS1	15.9971	15.7424	20.6339	19.5736	22.3187	17.8185	6.36757	4.46365	14.6899	7.2677	7.48665	17.4231
3301	3002	464	ENSGALT00000006491	ENSGALG00000004082	TAOK1	28.8814	18.8737	54.9975	37.1324	22.3506	26.1837	3.83709	1.0318	41.4962	9.65113	5.85861	31.1147
902	603	464	ENSGALT00000022512	ENSGALG00000013883	SNRNP27	159.269	136.603	286.143	184.861	175.918	243.68	178.823	178.723	224.348	230.998	193.561	241.426
3138	2839	464	ENSGALT00000023282	ENSGALG00000014408	LLGL1	35.4259	29.0945	60.1058	39.2643	37.3647	36.9161	18.2207	10.7975	42.961	14.7471	7.88452	38.5591
3056	2757	463	ENSGALT00000009872	ENSGALG00000006118	ZC3H18	36.2377	26.1633	46.4515	40.345	37.7048	39.2726	20.3487	14.799	43.7838	22.6343	28.03	34.132
3239	2940	463	ENSGALT00000002576	ENSGALG00000001684	SEC14L1	36.7042	21.9806	48.5048	37.8337	28.6077	30.9269	16.1074	4.94082	37.6123	16.0815	12.8707	31.19
1694	1395	463	ENSGALT00000046218	ENSGALG00000028201	rad9	69.2276	73.2388	63.0223	79.7356	69.0982	83.1494	96.9469	79.1687	74.7037	85.0158	103.153	74.5286
7050	6751	463	ENSGALT00000005975	ENSGALG00000003766	KIAA0100	14.0481	16.3472	23.8664	16.4762	14.4182	16.5208	7.45697	6.51833	18.5095	6.27236	5.36824	17.7422
3543	3244	463	ENSGALT00000024944	ENSGALG00000015469	IGSF3	28.2032	22.8668	34.0204	34.2883	16.8962	24.4259	5.65505	1.21823	28.6113	5.20167	1.6429	23.116
8485	8186	463	ENSGALT00000002797	ENSGALG00000001809	FAM65A	11.4551	12.7032	15.2429	13.588	12.6122	10.4586	9.57644	7.33283	12.7423	6.04792	4.55741	10.9392
2345	2046	463	ENSGALT00000023805	ENSGALG00000014758	ARHGAP28	78.4287	48.9346	79.7648	54.3652	42.2626	36.0646	9.85246	1.14848	57.1125	12.4489	16.6712	47.1677
3710	3411	462	ENSGALT00000017560	ENSGALG00000010798	DHCR24	33.865	39.492	1.06547	32.5391	23.7571	28.5457	23.1387	14.9363	37.5106	21.6548	13.4372	26.8832
7335	7036	462	ENSGALT00000005902	ENSGALG00000003719	CHD9	11.261	7.37358	23.5146	15.7747	9.93909	13.2147	1.30365	0.318787	17.9243	3.07702	3.40862	13.9945
4199	3900	461.891	ENSGALT00000021915	ENSGALG00000013439	ATP13A1	28.4945	32.3326	25.2335	28.4525	26.0637	26.9412	22.2977	15.4379	33.1351	15.4436	11.9208	32.2416
1864	1565	461	ENSGALT00000023982	ENSGALG00000014862	HMGCS1	86.1692	51.9067	3.20692	70.7672	62.3472	69.7733	39.5959	28.1184	98.9585	56.4542	35.7574	93.6687
2636	2337	461	ENSGALT00000018198	ENSGALG00000011163	GNPAT	54.6792	44.1071	108.192	47.3901	52.063	65.1477	41.9416	25.8224	83.8165	51.3606	39.6809	71.1692
2039	1740	461	ENSGALT00000002825	ENSGALG00000001827	GLYR1	62.0175	42.5014	87.1284	63.6498	41.9556	58.5233	17.5309	8.34828	70.7055	25.1594	18.0715	61.5323
2679	2380	460.886	ENSGALT00000022282	ENSGALG00000013702	NPEPPS	50.0125	39.214	66.1989	46.5224	63.2174	32.8125	64.2134	45.3717	41.7959	54.0961	61.8603	53.6622
1521	1222	460.852	ENSGALT00000045219	ENSGALG00000027904	USMG5	76.0811	88.2626	129.228	90.6015	88.8479	83.5629	91.0139	90.9613	93.8865	150.576	153.083	95.7405
1441	1142	460.628	ENSGALT00000045378	ENSGALG00000025842	BRT-1	80.136	81.9414	3.99997	96.9014	98.2577	108.612	68.5066	67.7485	107.665	87.4774	75.7187	82.9276
2497	2198	460.058	ENSGALT00000019945	ENSGALG00000012213	CNI	55.7806	65.1472	110.124	50.2841	55.436	59.0721	61.6674	48.4088	68.4583	77.2365	67.6253	82.1976
3886	3587	460	ENSGALT00000011918	ENSGALG00000007367	WFIKKN2	33.2074	75.9333	92.6832	30.8086	27.0043	40.2339	37.2273	41.062	37.5263	64.1733	50.9629	51.1284
3623	3324	460	ENSGALT00000006794	ENSGALG00000004273	RALGPS2	34.1896	23.7541	63.467	33.2462	29.9939	31.1036	15.0488	9.47912	37.5054	27.298	22.928	38.7548
3144	2845	459	ENSGALT00000016160	ENSGALG00000009940	SLC35E3	42.4308	41.6701	72.571	38.7593	36.7877	42.588	35.5023	25.942	46.7368	36.1466	31.4716	47.0581
2248	1949	459	ENSGALT00000025254	ENSGALG00000015663	HSDL2	59.1997	43.3143	2.84147	56.5778	46.4267	44.1452	49.3062	43.5675	52.2811	70.6516	44.5725	56.6212
1845	1546	459	ENSGALT00000004150	ENSGALG00000002634	HDAC3	67.2977	56.9601	107.465	71.3261	55.3197	76.8603	44.9118	26.5295	89.5643	47.16	42.0573	79.8074
3683	3384	459	ENSGALT00000043402	ENSGALG00000026254	ECE-1	31.1386	31.9363	33.8558	32.5858	30.4395	28.0201	19.8226	13.793	24.6933	13.8774	7.71715	23.5459
2475	2176	459	ENSGALT00000007942	ENSGALG00000004953	DRG2	48.3039	37.5409	82.555	50.6756	44.0807	44.4215	50.2405	39.0225	60.5737	51.2834	72.9876	56.6433
6887	6588	459	ENSGALT00000019087	ENSGALG00000011678	DNAJC13	16.0762	12.1234	24.6145	16.738	13.2687	16.6609	5.74729	3.64784	19.0553	6.47588	4.2067	14.447
4956	4657	459	ENSGALT00000015869	ENSGALG00000009752	C1GALT1	26.666	28.5837	55.4457	23.6784	22.3724	26.5039	14.566	9.99971	33.2346	15.314	13.6186	32.9986
865	566	459	ENSGALT00000044760	ENSGALG00000026226	ASNA1	166.381	147.543	102.431	194.824	171.139	209.69	156.405	122.283	163.321	149.628	112.994	181.006
2339	2040	458.4	ENSGALT00000003258	ENSGALG00000002090	GPSM2	57.5326	47.1856	97.781	53.9834	45.4567	61.8064	35.7737	29.3099	66.6999	44.7812	34.3701	65.2424
1749	1450	458	ENSGALT00000013668	ENSGALG00000008389	VBP1	81.0444	60.4174	186.55	75.8827	77.5568	92.5955	63.185	53.0361	113.462	91.3425	75.7165	129.927
[truncated: 14,398 more rows]
